# Supplementary material for: Direct synthesis of dialkyl ketones from deoxygenative cross-coupling of carboxylic acids and alcohols
Source: Royal Society of Chemistry journal article supplement (doi:10.1039/d4sc05420b), 2024-01-01

# Supporting Information

## Direct Synthesis of Dialkyl Ketones from Deoxygenative Cross-Coupling of Carboxylic Acids and Alcohols

Bo Yang<sup>a,b\*</sup>, Ri-Yuan Tang<sup>a,b\*</sup>

<sup>a</sup> Key Laboratory for Biobased Materials and Energy of Ministry of Education, College of Materials and Energy, South China Agricultural University, Guangzhou 510642, China

<sup>b</sup>State Key Laboratory of Green Pesticide, College of Materials and Energy, South China Agricultural University, Guangzhou, 510641, China

Corresponding author: Bo Yang, [boyang@scau.edu.cn](mailto:boyang@scau.edu.cn); Ri-Yuan Tang, [rytang@scau.edu.cn](mailto:rytang@scau.edu.cn)

### Table of Contents

|                                                                                                                            |    |
|----------------------------------------------------------------------------------------------------------------------------|----|
| I. General Information.....                                                                                                | 2  |
| II. Optimization of Reaction Conditions.....                                                                               | 2  |
| III. General Procedure for Direct Ketone Synthesis from Carboxylic Acids and Alcohols via Metallaphotoredox Catalysis..... | 5  |
| IV. Late-stage Functionalization of Complex Molecules.....                                                                 | 25 |
| V. Mechanistic Studies.....                                                                                                | 30 |
| VI. References.....                                                                                                        | 37 |
| VII.NMR Spectra.....                                                                                                       | 38 |

## I. General Information

Dry DMAc and 1,4-dioxane were purchased from suppliers and used directly. Unless stated otherwise, reactions were performed in flame-dried glassware. Analytical thin layer chromatography (TLC) was performed on precoated silica gel 60 F254 plates and visualization on TLC was achieved by UV light (254 and 365 nm) or by phosphomolybdic acid. Flash column chromatography was performed on silica gel (300-400 mesh). Unless otherwise noted, all the corresponding carboxylic acids and alcohols from suppliers were used directly without further purification. NMR spectra were recorded on a Bruker-500 instrument. <sup>1</sup>H NMR chemical shifts were referenced to the tetramethylsilane (0 ppm); <sup>13</sup>C NMR chemical shifts were referenced to the solvent resonance (77.00 ppm, CDCl<sub>3</sub>). The following abbreviations (or combinations thereof) were used to explain multiplicities: s = singlet, d = doublet, t = triplet, m = multiplet. Mass spectra (HRMS) were obtained using Waters G2-XS Q-TOF LC/MS (ESI) mass spectrometer. Melting points were determined using a hot stage apparatus. All manipulations were conducted under Schlenk tubes.

## II. Optimization of Reaction Conditions

### Screening of various bases, photocatalysts (PC) and ligands (L)

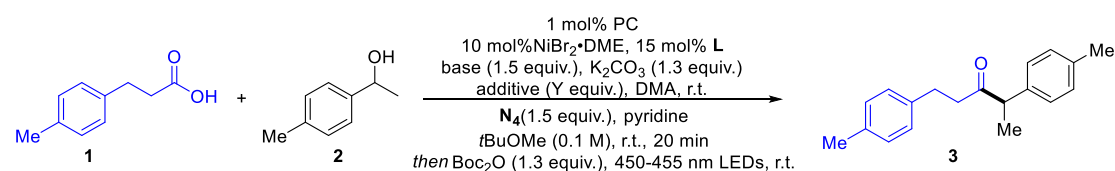

| Entry | Base                            | PC                                                               | [L]    | Yield (%) <sup>a</sup> |
|-------|---------------------------------|------------------------------------------------------------------|--------|------------------------|
| 1     | NaOAc                           | Ir(ppy) <sub>2</sub> (dtbbpy)PF <sub>6</sub>                     | dtbbpy | 60                     |
| 2     | quinuclidine                    | Ir(ppy) <sub>2</sub> (dtbbpy)PF <sub>6</sub>                     | dtbbpy | trace                  |
| 3     | 2,6-lutidine                    | Ir(ppy) <sub>2</sub> (dtbbpy)PF <sub>6</sub>                     | dtbbpy | 34                     |
| 4     | Cs <sub>2</sub> CO <sub>3</sub> | Ir(ppy) <sub>2</sub> (dtbbpy)PF <sub>6</sub>                     | dtbbpy | 42                     |
| 5     | DBU                             | Ir(ppy) <sub>2</sub> (dtbbpy)PF <sub>6</sub>                     | dtbbpy | 5                      |
| 6     | Na <sub>2</sub> CO <sub>3</sub> | Ir(ppy) <sub>2</sub> (dtbbpy)PF <sub>6</sub>                     | dtbbpy | trace                  |
| 7     | Cs <sub>2</sub> CO <sub>3</sub> | Ir(ppy) <sub>2</sub> (dtbbpy)PF <sub>6</sub>                     | dtbbpy | 48                     |
| 8     | NaOAc                           | Ir[dF(CF <sub>3</sub> )ppy] <sub>2</sub> (dtbbpy)PF <sub>6</sub> | dtbbpy | 50                     |

|    |       |                                                    |        |    |
|----|-------|----------------------------------------------------|--------|----|
| 9  | NaOAc | Ir[dF(Me)ppy] <sub>2</sub> (dtbbpy)PF <sub>6</sub> | dtbbpy | 38 |
| 10 | NaOAc | 4CzIPN                                             | dtbbpy | 62 |
| 11 | NaOAc | 4CzIPN                                             | bpy    | 37 |
| 12 | NaOAc | 4CzIPN                                             | dtbbpy | 39 |

<sup>a</sup> Yields were determined by <sup>1</sup>H NMR spectroscopy with mesitylene as an internal standard.

## Screening of various NHCs and additives

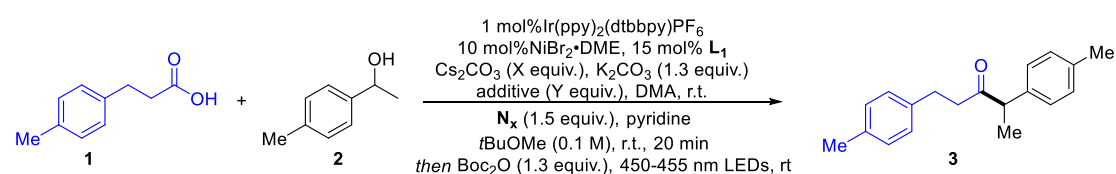

| Entry           | X   | Additive/Y                              | Yield (%) <sup>a</sup> |
|-----------------|-----|-----------------------------------------|------------------------|
| 1               | 2   | /                                       | 31                     |
| 2               | 1.5 | /                                       | 48                     |
| 3               | 1.0 | /                                       | 42                     |
| 4               | 0.5 | /                                       | trace                  |
| 5               | 0   | /                                       | trace                  |
| 6               | 1.0 | /                                       | trace                  |
| 7               | 1.0 | H <sub>2</sub> O/5                      | 52                     |
| 8               | 1.5 | H <sub>2</sub> O/10                     | 54                     |
| 9               | 1.5 | H <sub>2</sub> O/0                      | 26                     |
| 10              | 1.5 | H <sub>2</sub> O/5                      | 53                     |
| 11              | 1.5 | H <sub>2</sub> O/15                     | 36                     |
| 12 <sup>b</sup> | 1.5 | H <sub>2</sub> O/5                      | 46                     |
| 13 <sup>c</sup> | 1.5 | H <sub>2</sub> O/5                      | 25                     |
| 14              | 1.5 | H <sub>2</sub> O/5                      | 16                     |
| 15              | 1.5 | H <sub>2</sub> O/NH <sub>4</sub> Cl/5/1 | 16                     |

<sup>a</sup>Yields were determined by <sup>1</sup>H NMR spectroscopy with mesitylene as an internal standard.

<sup>b</sup>Boc<sub>2</sub>O/K<sub>2</sub>CO<sub>3</sub> 1.5 eq; <sup>c</sup> Boc<sub>2</sub>O/K<sub>2</sub>CO<sub>3</sub> 1.7 equiv.

**Note: The experiments showed good tolerance when water was added to the system, indicating its potential practicality.**

## Screening of different kinds of NHCs and Ligands

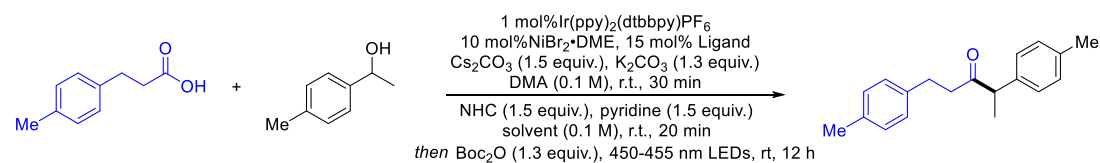

| Entry             | Solvent           | Ligand         | Yield (%) <sup>a</sup> |
|-------------------|-------------------|----------------|------------------------|
| 1                 | <i>t</i> BuOMe    | L <sub>1</sub> | 60                     |
| 2                 | <i>t</i> BuOMe    | L <sub>2</sub> | 37                     |
| 3                 | <i>t</i> BuOMe    | L <sub>3</sub> | 32                     |
| 4                 | <i>t</i> BuOMe    | L <sub>4</sub> | 30                     |
| 5                 | <i>t</i> BuOMe    | L <sub>5</sub> | trace                  |
| 6                 | PhCF <sub>3</sub> | L <sub>1</sub> | 54                     |
| 7                 | 1,4-Dioxane       | L <sub>1</sub> | 72                     |
| 8                 | THF               | L <sub>1</sub> | 13                     |
| 9                 | MeCN              | L <sub>1</sub> | <10%                   |
| 10 <sup>b</sup>   | 1,4-Dioxane       | L <sub>1</sub> | 75                     |
| 11 <sup>b,c</sup> | 1,4-Dioxane       | L <sub>1</sub> | 78                     |

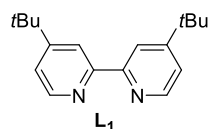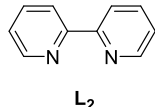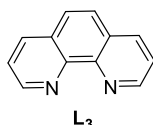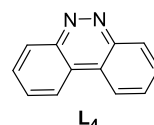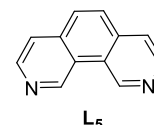

<sup>a</sup>Yields were determined by <sup>1</sup>H NMR spectroscopy with mesitylene as an internal standard. <sup>b</sup>20 h;

<sup>c</sup>5 mol% NiBr<sub>2</sub>•DME, 7.5 mol% dtbbpy

## Systematic screening of different kinds of NHCs

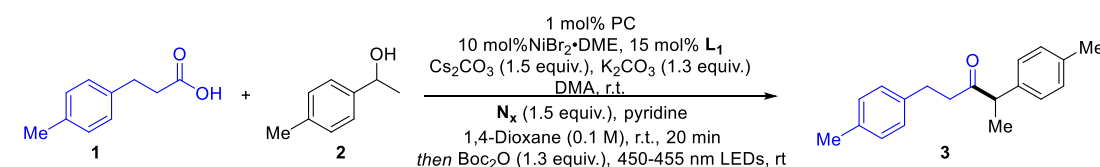

NHC additives

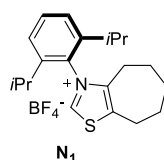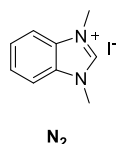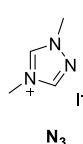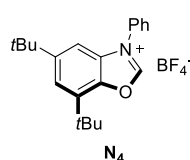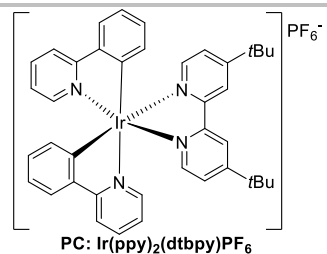

| Entry | N <sub>x</sub> | Yield (%) <sup>a</sup> |
|-------|----------------|------------------------|
| 1     | N <sub>1</sub> | 0                      |
| 2     | N <sub>2</sub> | trace                  |
| 3     | N <sub>3</sub> | 0                      |

<sup>a</sup>Yields were determined by <sup>1</sup>H NMR spectroscopy with mesitylene as an internal standard.

### III. General Procedure for Direct Ketone Synthesis from Carboxylic Acids and Alcohols via Metallaphotoredox Catalysis

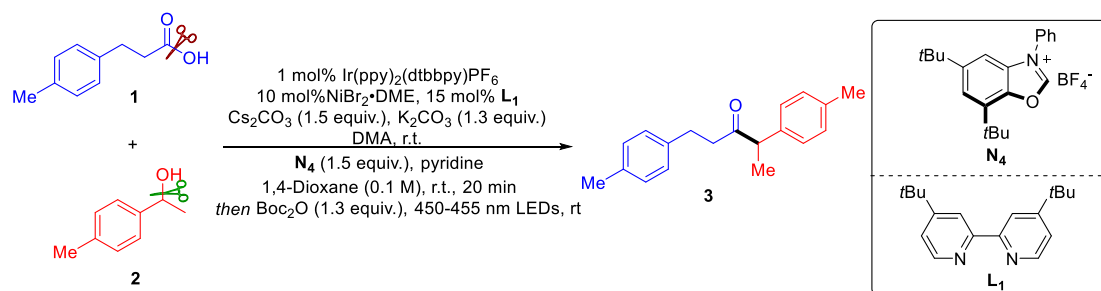

#### General procedure A:

An oven-dried 25 mL flask was evacuated and back-filled with N<sub>2</sub> for three times. After cooling at room temperature, Ir(ppy)<sub>2</sub>(dtbbpy)PF<sub>6</sub> (0.003 mmol), dtbbpy (L<sub>1</sub>) (0.0225 mmol), K<sub>2</sub>CO<sub>3</sub> (0.39 mmol), Cs<sub>2</sub>CO<sub>3</sub> (0.45 mmol) and NiBr<sub>2</sub>·DME (0.015 mmol) were added sequentially under N<sub>2</sub> atmosphere. Then DMAc (3 mL) was added. The reaction mixture was stirred at room temperature for 30 min.

Another oven-dried 10 mL flask was evacuated and back-filled with N<sub>2</sub> for three times. After cooling at room temperature, NHC (N<sub>4</sub>) (0.45 mmol), 1,4-dioxane (3 mL) and alcohol **2** (0.42 mmol) were added. Then pyridine (0.42 mmol) was added dropwise via a microsyringe. The reaction mixture was stirred for 20 min at room temperature. The 1,4-dioxane suspension was transferred to a 5 mL syringe under N<sub>2</sub>. Then a syringe filter and a new needle were installed on the syringe, and the 1,4-dioxane solution was injected through the syringe filter into the mentioned above flask containing the Ir/Ni catalysts followed by adding carboxylic acid **1** (0.3 mmol) and Boc<sub>2</sub>O (0.39 mmol). The resulting crude mixture was then allowed to stir at room temperature and irradiated by 450-455 nm LEDs at a distance of 5 cm for 24 h at room temperature. The reaction mixture was quenched by water (10 mL) and extracted by ethyl acetate (15 mL) for 3 times. The combined organic layers were dried over anhydrous Na<sub>2</sub>SO<sub>4</sub>. After filtration, the filtrate was concentrated *in vacuo* before it was purified by flash chromatography on silica gel to afford the desired ketone.

### General procedure B:

An oven-dried 25 mL flask was evacuated and back-filled with N<sub>2</sub> for three times. After cooling at room temperature, Ir(ppy)<sub>2</sub>(dtbbpy)PF<sub>6</sub> (0.004 mmol), dtbbpy (L<sub>1</sub>) (0.03 mmol), K<sub>2</sub>CO<sub>3</sub> (0.52 mmol), Cs<sub>2</sub>CO<sub>3</sub> (0.60 mmol) and NiBr<sub>2</sub>•DME (0.02 mmol) were added sequentially under N<sub>2</sub> atmosphere. Then DMAc (4 mL) was added. The reaction mixture was stirred at room temperature for 30 min.

Another oven-dried 10 mL flask was evacuated and back-filled with N<sub>2</sub> for three times. After cooling at room temperature, NHC (N<sub>4</sub>) (0.60 mmol), 1,4-dioxane (4 mL) and alcohol **2** (0.56 mmol) were added. Then pyridine (0.56 mmol) was added dropwise via a microsyringe. The reaction mixture was stirred for 20 min at room temperature. The 1,4-dioxane suspension was transferred to a 5 mL syringe under N<sub>2</sub>. Then a syringe filter and a new needle were installed on the syringe, and the 1,4-dioxane solution was injected through the syringe filter into the mentioned above flask containing the Ir/Ni catalysts followed by adding carboxylic acid **1** (0.4 mmol) and Boc<sub>2</sub>O (0.52 mmol). The resulting crude mixture was then allowed to stir at room temperature and irradiated by 450-455 nm LEDs at a distance of 5 cm for 24 h at room temperature. The reaction mixture was quenched by water (10 mL) and extracted by ethyl acetate (15 mL) for 3 times. The combined organic layers were dried over anhydrous Na<sub>2</sub>SO<sub>4</sub>. After filtration, the filtrate was concentrated in *vacuo* before it was purified by flash chromatography on silica gel to afford the desired ketone.

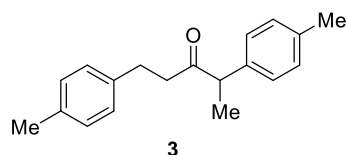

1,4-di-*p*-tolylpentan-3-one (**3**). Prepared according to the general procedure A employing Ir(ppy)<sub>2</sub>(dtbbpy)PF<sub>6</sub> (2.7 mg, 0.003 mmol), dtbbpy (L<sub>1</sub>) (6.4 mg, 0.0225 mmol), K<sub>2</sub>CO<sub>3</sub> (53.8 mg, 0.39 mmol),

Cs<sub>2</sub>CO<sub>3</sub> (147.0 mg, 0.45 mmol), NiBr<sub>2</sub>•DME (4.7 mg, 0.015 mmol), NHC (177.6 mg, 0.45 mmol), 1,4-dioxane (3 mL), 1-(4-Methylphenyl)ethanol (56.8 mg, 0.42 mmol), pyridine (33.3 mg, 0.42 mmol), 3-(4-methylphenyl)propionic acid (49.8 mg, 0.3 mmol) and Boc<sub>2</sub>O (85.2 mg, 0.39 mmol). After 20 h, The reaction mixture was quenched by water (10 mL) and extracted by ethyl acetate (15 mL) for 3 times. The combined organic layers were dried over anhydrous Na<sub>2</sub>SO<sub>4</sub>. After filtration,

the filtrate was concentrated in *vacuo* before it was purified by flash chromatography (PE/EA = 45/1) on silica gel to afford **3** (59.9 mg, 0.225 mmol, 75% yield) as a yellow oil. <sup>1</sup>H NMR (400 MHz, Chloroform-*d*) δ 7.13 – 6.98 (m, 6H), 6.94 (d, *J* = 8.0 Hz, 2H), 3.65 (q, *J* = 6.8 Hz, 1H), 2.86 – 2.57 (m, 4H), 2.31 (s, 3H), 2.28 (s, 3H), 1.34 (d, *J* = 7.2 Hz, 3H); <sup>13</sup>C NMR (101 MHz, Chloroform-*d*) δ 210.1, 137.9, 137.4, 136.7, 135.3, 129.5, 129.0, 128.1, 127.7, 52.7, 42.6, 29.5, 21.0, 20.9, 17.3; HRMS (ESI-TOF) Calcd for C<sub>19</sub>H<sub>22</sub>ONa [M+Na]<sup>+</sup>: 289.1563; Found 289.1570.

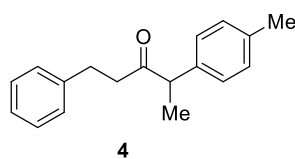

1-phenyl-4-(*p*-tolyl)pentan-3-one (**4**).<sup>1</sup> Prepared according to the general procedure B employing Ir(ppy)<sub>2</sub>(dtbbpy)PF<sub>6</sub> (3.9 mg, 0.004 mmol), dtbbpy (L<sub>1</sub>) (8.5 mg, 0.03 mmol), K<sub>2</sub>CO<sub>3</sub> (72.1 mg, 0.60 mmol),

Cs<sub>2</sub>CO<sub>3</sub> (196.1 mg, 0.60 mmol), NiBr<sub>2</sub>•DME (6.4 mg, 0.02 mmol), NHC (236.0 mg, 0.60 mmol), 1,4-dioxane (4 mL), 1-(4-Methylphenyl)ethanol (78.1 mg, 0.56 mmol), pyridine (44.3 mg, 0.56 mmol), 3-Phenylpropanoic acid (60.2 mg, 0.4 mmol) and Boc<sub>2</sub>O (114.0 mg, 0.52 mmol). After 20 h, The reaction mixture was quenched by water (10 mL) and extracted by ethyl acetate (15 mL) for 3 times. The combined organic layers were dried over anhydrous Na<sub>2</sub>SO<sub>4</sub>. After filtration, the filtrate was concentrated in *vacuo* before it was purified by flash chromatography (PE/EA = 50/1) on silica gel to afford **4** (60.5 mg, 0.24 mmol, 60% yield) as a colorless oil. <sup>1</sup>H NMR (400 MHz, Chloroform-*d*) δ 7.20 (dd, *J* = 6.8, 6.4 Hz, 2H), 7.17 – 6.98 (m, 7H), 3.65 (q, *J* = 7.2 Hz, 1H), 2.91 – 2.71 (m, 2H), 2.69 – 2.57 (m, 2H), 2.30 (s, 3H), 1.35 (d, *J* = 7.2 Hz, 3H); <sup>13</sup>C NMR (101 MHz, Chloroform-*d*) δ 210.0, 141.0, 137.4, 136.7, 129.5, 128.3, 128.2, 127.6, 125.9, 52.7, 42.4, 29.9, 21.0, 17.3.

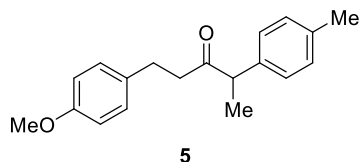

1-(4-methoxyphenyl)-4-(*p*-tolyl)pentan-3-one (**5**).<sup>2</sup>

Prepared according to the general procedure B employing Ir(ppy)<sub>2</sub>(dtbbpy)PF<sub>6</sub> (3.9 mg, 0.004 mmol), dtbbpy (L<sub>1</sub>) (8.5 mg, 0.03 mmol), K<sub>2</sub>CO<sub>3</sub> (72.0 mg, 0.60 mmol), Cs<sub>2</sub>CO<sub>3</sub> (194.7 mg, 0.60 mmol), NiBr<sub>2</sub>•DME (6.6mg, 0.02 mmol), NHC (237.9 mg, 0.60 mmol), 1,4-dioxane (4 mL), 1-(4-methylphenyl)ethanol (76.7 mg, 0.56 mmol), pyridine (44.3 mg, 0.56 mmol), 3-(4-methoxyphenyl)propanoic acid (50.8 mg, 0.4 mmol) and Boc<sub>2</sub>O (113.7 mg, 0.52 mmol). After 20 h, The reaction mixture was quenched by water (10 mL) and extracted by ethyl acetate (15 mL) for 3 times. The combined organic layers

were dried over anhydrous Na<sub>2</sub>SO<sub>4</sub>. After filtration, the filtrate was concentrated in *vacuo* before it was purified by flash chromatography (PE/EA = 50/1) on silica gel to afford **5** (60.5 mg, 0.18 mmol, 45% yield) as a pale yellow oil. <sup>1</sup>H NMR (400 MHz, Chloroform-*d*) δ 7.10 (d, *J* = 7.6 Hz, 2H), 7.03 (d, *J* = 8.0 Hz, 2H), 6.97 (d, *J* = 8.4 Hz, 2H), 6.75 (d, *J* = 8.8 Hz, 2H), 3.76 (s, 3H), 3.65 (q, *J* = 6.8 Hz, 1H), 2.84 – 2.55 (m, 4H), 2.31 (s, 3H), 1.34 (d, *J* = 6.8 Hz, 3H); <sup>13</sup>C NMR (101 MHz, Chloroform-*d*) δ 210.2, 157.8, 137.4, 136.7, 133.1, 129.5, 129.1, 127.7, 113.7, 55.2, 52.7, 42.7, 29.1, 21.0, 17.3.

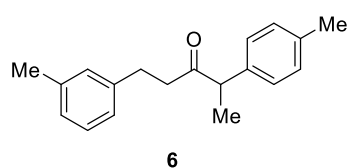

**6** 1-(*m*-tolyl)-4-(*p*-tolyl)pentan-3-one (**6**). Prepared according to the general procedure B employing Ir(ppy)<sub>2</sub>(dtbbpy)PF<sub>6</sub> (3.9 mg, 0.004 mmol), dtbbpy (L<sub>1</sub>) (8.0 mg, 0.03 mmol), K<sub>2</sub>CO<sub>3</sub> (71.9 mg, 0.60 mmol), Cs<sub>2</sub>CO<sub>3</sub> (194.7 mg, 0.60 mmol), NiBr<sub>2</sub>•DME (6.6mg, 0.02 mmol), NHC (236.7 mg, 0.60 mmol), 1,4-dioxane (4 mL), 1-(4-methylphenyl)ethanol (77.7 mg, 0.56 mmol), pyridine (44.3 mg, 0.56 mmol), 3-(3-methylphenyl)propionic acid (66.0 mg, 0.4 mmol) and Boc<sub>2</sub>O (113.5 mg, 0.52 mmol). After 20 h, The reaction mixture was quenched by water (10 mL) and extracted by ethyl acetate (15 mL) for 3 times. The combined organic layers were dried over anhydrous Na<sub>2</sub>SO<sub>4</sub>. After filtration, the filtrate was concentrated in *vacuo* before it was purified by flash chromatography (PE/EA = 50/1) on silica gel to afford **6** (66.0 mg, 0.248 mmol, 62% yield) as a yellow oil. <sup>1</sup>H NMR (400 MHz, Chloroform-*d*) δ 7.13 – 7.07 (m, 3H), 7.04 (d, *J* = 8.4 Hz, 2H), 6.95 (d, *J* = 7.6 Hz, 1H), 6.88 – 6.82 (m, 2H), 3.66 (q, *J* = 6.8 Hz, 1H), 2.85 – 2.55 (m, 4H), 2.31 (s, 3H), 2.26 (s, 3H), 1.35 (d, *J* = 6.8 Hz, 3H); <sup>13</sup>C NMR (101 MHz, Chloroform-*d*) δ 210.1, 141.0, 137.9, 137.4, 136.7, 129.5, 129.0, 128.2, 127.7, 126.6, 125.2, 52.7, 42.5, 29.8, 21.3, 21.0, 17.3; HRMS (ESI-TOF) Calcd for C<sub>19</sub>H<sub>22</sub>ONa [M+Na]<sup>+</sup>: 289.1563; Found 289.1571.

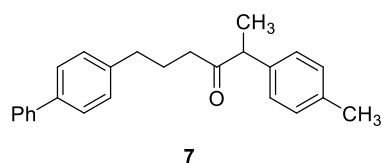

**7** 6-([1,1'-biphenyl]-4-yl)-2-(*p*-tolyl)hexan-3-one (**7**). Prepared according to the general procedure A employing Ir(ppy)<sub>2</sub>(dtbbpy)PF<sub>6</sub> (2.7 mg, 0.003 mmol), dtbbpy (L<sub>1</sub>) (6.2 mg, 0.0225 mmol), K<sub>2</sub>CO<sub>3</sub> (53.3 mg, 0.39 mmol), Cs<sub>2</sub>CO<sub>3</sub> (147.1 mg, 0.45 mmol), NiBr<sub>2</sub>•DME (4.8 mg, 0.015 mmol), NHC (177.5 mg, 0.45 mmol), 1,4-dioxane (3 mL), 1-(4-methylphenyl)ethanol (57.4

mg, 0.42 mmol), pyridine (33.3 mg, 0.42 mmol), 4-(4-biphenyl)butyric acid (72.2 mg, 0.3 mmol) and Boc<sub>2</sub>O (85.2 mg, 0.39 mmol). After 20 h, The reaction mixture was quenched by water (10 mL) and extracted by ethyl acetate (15 mL) for 3 times. The combined organic layers were dried over anhydrous Na<sub>2</sub>SO<sub>4</sub>. After filtration, the filtrate was concentrated in *vacuo* before it was purified by flash chromatography (PE/EA = 45/1) on silica gel to afford **7** (62.7 mg, 0.183 mmol, 61% yield) as a yellow oil. <sup>1</sup>H NMR (400 MHz, Chloroform-*d*) δ 7.56 (d, *J* = 7.0 Hz, 2H), 7.49 – 7.39 (m, 4H), 7.35 – 7.29 (m, 1H), 7.17-7.05 (m, 6H), 3.70 (q, *J* = 6.8 Hz, 1H), 2.61 – 2.35 (m, 4H), 2.33 (s, 3H), 1.90-1.79 (m, 2H), 1.36 (d, *J* = 6.8 Hz, 3H); <sup>13</sup>C NMR (101 MHz, Chloroform-*d*) δ 210.8, 141.0, 140.8, 138.7, 137.6, 136.8, 129.6, 128.8, 128.7, 127.7, 127.0, 126.9, 52.6, 40.0, 34.5, 25.3, 21.0, 17.4; HRMS (ESI-TOF) Calcd for C<sub>25</sub>H<sub>26</sub>ONa [M+Na]<sup>+</sup>: 365.1876; Found 365.1885.

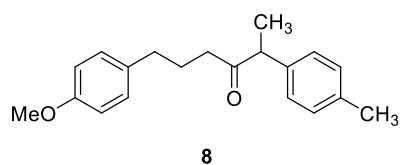

6-(4-methoxyphenyl)-2-(*p*-tolyl)hexan-3-one (**8**).<sup>3</sup> Prepared according to the general procedure A employing Ir(ppy)<sub>2</sub>(dtbbpy)PF<sub>6</sub> (2.8 mg, 0.003 mmol), dtbbpy (L<sub>1</sub>) (6.2 mg, 0.0225 mmol), K<sub>2</sub>CO<sub>3</sub> (54.5 mg, 0.39 mmol), Cs<sub>2</sub>CO<sub>3</sub> (147.0 mg, 0.45 mmol), NiBr<sub>2</sub>•DME (4.7 mg, 0.015 mmol), NHC (178.0 mg, 0.45 mmol), 1,4-dioxane (3 mL), 1-(4-methylphenyl)ethanol (57.2 mg, 0.42 mmol), pyridine (33.3 mg, 0.42 mmol), 4-(4-methoxyphenyl)butyric acid (58.3 mg, 0.3 mmol) and Boc<sub>2</sub>O (85.2 mg, 0.39 mmol). After 20 h, The reaction mixture was quenched by water (10 mL) and extracted by ethyl acetate (15 mL) for 3 times. The combined organic layers were dried over anhydrous Na<sub>2</sub>SO<sub>4</sub>. After filtration, the filtrate was concentrated in *vacuo* before it was purified by flash chromatography (PE/EA = 45/1) on silica gel to afford **8** (53.3 mg, 0.18 mmol, 60% yield) as a yellow oil. <sup>1</sup>H NMR (400 MHz, Chloroform-*d*) δ 7.13 (d, *J* = 8.0 Hz, 2H), 7.08 (d, *J* = 8.0 Hz, 2H), 6.95 (d, *J* = 8.8 Hz, 2H), 6.77 (d, *J* = 8.8 Hz, 2H), 3.77 (s, 3H), 3.68 (q, *J* = 7.2 Hz, 1H), 2.50 – 2.31 (m, 7H), 1.82-1.72 (m, 2H), 1.48 (s, 3H), 1.35 (d, *J* = 6.8 Hz, 3H); <sup>13</sup>C NMR (101 MHz, Chloroform-*d*) δ 210.9, 136.7, 133.7, 129.8, 129.6, 129.3, 127.7, 125.5, 113.6, 55.2, 52.5, 40.0, 34.0, 31.6, 29.7, 25.5, 21.0.

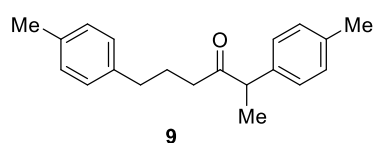

2,6-di-*p*-tolylhexan-3-one (**9**). Prepared according to the general procedure B employing Ir(ppy)<sub>2</sub>(dtbbpy)PF<sub>6</sub> (3.7 mg, 0.004 mmol), dtbbpy (L<sub>1</sub>) (8.5 mg, 0.03 mmol), K<sub>2</sub>CO<sub>3</sub> (72.0 mg, 0.60

mmol), Cs<sub>2</sub>CO<sub>3</sub> (196.0 mg, 0.60 mmol), NiBr<sub>2</sub>•DME (6.6 mg, 0.02 mmol), NHC (237.5 mg, 0.60 mmol), 1,4-dioxane (4 mL), 1-(4-methylphenyl)ethanol (76.7 mg, 0.56 mmol), pyridine (44.3 mg, 0.56 mmol), 4-(*p*-Tolyl)butanoic acid (72.0 mg, 0.4 mmol) and Boc<sub>2</sub>O (113.6 mg, 0.52 mmol). After 20 h, The reaction mixture was quenched by water (10 mL) and extracted by ethyl acetate (15 mL) for 3 times. The combined organic layers were dried over anhydrous Na<sub>2</sub>SO<sub>4</sub>. After filtration, the filtrate was concentrated in *vacuo* before it was purified by flash chromatography (PE/EA = 50/1) on silica gel to afford **9** (140.2 mg, 0.20 mmol, 50% yield) as a colorless oil. <sup>1</sup>H NMR (400 MHz, Chloroform-*d*) δ 7.12 (d, *J* = 8.0 Hz, 2H), 7.11 – 7.00 (m, 4H), 6.93 (d, *J* = 8.0 Hz, 2H), 3.67 (q, *J* = 7.0 Hz, 1H), 2.52 – 2.31 (m, 7H), 2.29 (s, 3H), 1.78 (p, *J* = 7.2 Hz, 2H), 1.35 (d, *J* = 7.2 Hz, 3H); <sup>13</sup>C NMR (101 MHz, Chloroform-*d*) δ 210.8, 138.6, 137.6, 136.7, 135.1, 129.5, 128.9, 128.2, 127.7, 52.5, 40.1, 34.4, 25.4, 21.0, 20.9, 17.4; HRMS (ESI-TOF) Calcd for C<sub>20</sub>H<sub>24</sub>ONa [M+Na]<sup>+</sup>: 303.1719; Found 303.1727.

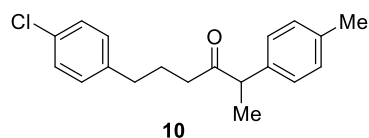

6-(4-chlorophenyl)-2-(*p*-tolyl)hexan-3-one (**10**). Prepared according to the general procedure B employing Ir(ppy)<sub>2</sub>(dtbbpy)PF<sub>6</sub> (3.7 mg, 0.004 mmol), dtbbpy (L<sub>1</sub>) (8.4 mg,

0.03 mmol), K<sub>2</sub>CO<sub>3</sub> (71.9 mg, 0.60 mmol), Cs<sub>2</sub>CO<sub>3</sub> (196.0 mg, 0.60 mmol), NiBr<sub>2</sub>•DME (6.5 mg, 0.02 mmol), NHC (237.0 mg, 0.60 mmol), 1,4-dioxane (4 mL), 1-(4-methylphenyl)ethanol (76.7 mg, 0.56 mmol), pyridine (44.3 mg, 0.56 mmol), 4-(4-chlorophenyl)butyric acid (79.4 mg, 0.4 mmol) and Boc<sub>2</sub>O (114.0 mg, 0.52 mmol). After 20 h, The reaction mixture was quenched by water (10 mL) and extracted by ethyl acetate (15 mL) for 3 times. The combined organic layers were dried over anhydrous Na<sub>2</sub>SO<sub>4</sub>. After filtration, the filtrate was concentrated in *vacuo* before it was purified by flash chromatography (PE/EA = 50/1) on silica gel to afford **10** (66.0 mg, 0.22 mmol, 55% yield) as a colorless oil. <sup>1</sup>H NMR (400 MHz, Chloroform-*d*) δ 7.17 (d, *J* = 8.0 Hz, 2H), 7.14 (d, *J* = 8.0 Hz, 2H), 7.08 (d, *J* = 8.0 Hz, 2H), 6.94 (d, *J* = 8.0 Hz, 2H), 3.68 (q, *J* = 6.8 Hz, 1H), 2.53 – 2.25 (m, 7H), 1.83-1.72 (m, 2H), 1.36 (d, *J* = 7.2 Hz, 3H); <sup>13</sup>C NMR (101 MHz, Chloroform-*d*) δ 210.6, 140.1, 137.5, 136.8, 129.7, 129.6, 128.3, 127.7, 52.6, 39.7, 34.1, 25.1, 21.0, 17.4; HRMS (ESI-TOF) Calcd for C<sub>19</sub>H<sub>21</sub>ClONa [M+Na]<sup>+</sup>: 323.1173; Found 323.1179.

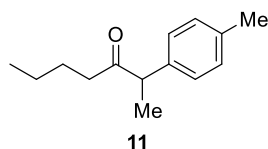

2-(*p*-tolyl)heptan-3-one (**11**).<sup>4</sup> Prepared according to the general procedure

B employing Ir(ppy)<sub>2</sub>(dtbbpy)PF<sub>6</sub> (3.8 mg, 0.004 mmol), dtbbpy (L<sub>1</sub>) (8.3 mg, 0.03 mmol), K<sub>2</sub>CO<sub>3</sub> (71.8 mg, 0.60 mmol), Cs<sub>2</sub>CO<sub>3</sub> (196.0 mg, 0.60

mmol), NiBr<sub>2</sub>•DME (6.3 mg, 0.02 mmol), NHC (237.0 mg, 0.60 mmol), 1,4-dioxane (4 mL), 1-(4-methylphenyl)ethanol (76.8 mg, 0.56 mmol), pyridine (44.3 mg, 0.56 mmol), valeric acid (41.3 mg, 0.4 mmol) and Boc<sub>2</sub>O (114.0 mg, 0.52 mmol). After 20 h, The reaction mixture was quenched by water (10 mL) and extracted by ethyl acetate (15 mL) for 3 times. The combined organic layers were dried over anhydrous Na<sub>2</sub>SO<sub>4</sub>. After filtration, the filtrate was concentrated in *vacuo* before it was purified by flash chromatography (PE/EA = 30/1) on silica gel to afford **11** (49.8 mg, 0.244 mmol, 61% yield) as a pale yellow oil. <sup>1</sup>H NMR (400 MHz, Chloroform-*d*) δ 7.16-7.06 (m, 4H), 3.71 (q, *J* = 7.2 Hz, 1H), 2.39 – 2.27 (m, 5H), 1.53-1.40 (m, 2H), 1.36 (d, *J* = 7.2 Hz, 3H), 1.24 – 1.13 (m, 2H), 0.81 (t, *J* = 7.2 Hz, 3H); <sup>13</sup>C NMR (101 MHz, Chloroform-*d*) δ 211.3, 137.7, 136.6, 129.5, 127.7, 52.5, 40.6, 25.9, 22.2, 21.0, 17.5, 13.8.

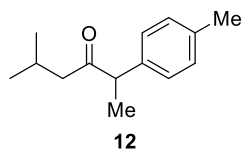

5-methyl-2-(*p*-tolyl)hexan-3-one (**12**). Prepared according to the general procedure B employing Ir(ppy)<sub>2</sub>(dtbbpy)PF<sub>6</sub> (3.8 mg, 0.004 mmol), dtbbpy (L<sub>1</sub>) (8.3 mg, 0.03 mmol), K<sub>2</sub>CO<sub>3</sub> (71.7 mg, 0.60 mmol), Cs<sub>2</sub>CO<sub>3</sub> (196.0 mg, 0.60 mmol), NiBr<sub>2</sub>•DME (6.5 mg, 0.02 mmol), NHC (236.7 mg, 0.60 mmol), 1,4-dioxane (4 mL), 1-(4-methylphenyl)ethanol (76.8 mg, 0.56 mmol), pyridine (44.3 mg, 0.56 mmol), 3-methylbutanoic acid (41.0 mg, 0.4 mmol) and Boc<sub>2</sub>O (113.9 mg, 0.52 mmol). After 20 h, The reaction mixture was quenched by water (10 mL) and extracted by ethyl acetate (15 mL) for 3 times.

The combined organic layers were dried over anhydrous Na<sub>2</sub>SO<sub>4</sub>. After filtration, the filtrate was concentrated in *vacuo* before it was purified by flash chromatography (PE/EA = 50/1) on silica gel to afford **12** (65.3 mg, 0.32 mmol, 80% yield) as a pale yellow oil. <sup>1</sup>H NMR (400 MHz, Chloroform-*d*) δ 7.11 (q, *J* = 8.0 Hz, 4H), 3.68 (q, *J* = 6.8 Hz, 1H), 2.32 (s, 3H), 2.28 – 2.16 (m, 2H), 2.15 – 2.03 (m, 1H), 1.35 (d, *J* = 6.8 Hz, 3H), 0.84 (d, *J* = 6.8 Hz, 3H), 0.75 (d, *J* = 6.8 Hz, 3H); <sup>13</sup>C NMR (101 MHz, Chloroform-*d*) δ 210.6, 137.5, 136.6, 129.5, 127.7, 52.8, 49.9, 24.3, 22.5, 22.2, 21.0, 17.4; HRMS (ESI-TOF) Calcd for C<sub>14</sub>H<sub>20</sub>ONa [M+Na]<sup>+</sup>: 227.1406; Found 227.1405.

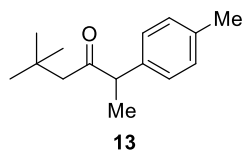

2-([1,1'-biphenyl]-4-yl)-5,5-dimethylhexan-3-one (**13**). Prepared according to the general procedure B employing Ir(ppy)<sub>2</sub>(dtbbpy)PF<sub>6</sub> (3.8 mg, 0.004 mmol), dtbbpy (L<sub>1</sub>) (8.3 mg, 0.03 mmol), K<sub>2</sub>CO<sub>3</sub> (71.7 mg, 0.60 mmol),

Cs<sub>2</sub>CO<sub>3</sub> (196.0 mg, 0.60 mmol), NiBr<sub>2</sub>•DME (6.4 mg, 0.02 mmol), NHC (237.6 mg, 0.60 mmol), 1,4-dioxane (4 mL), 1-(4-methylphenyl)ethanol (76.8 mg, 0.56 mmol), pyridine (44.3 mg, 0.56 mmol), 3,3-dimethylbutyric acid (47.0 mg, 0.4 mmol) and Boc<sub>2</sub>O (113.9 mg, 0.52 mmol). After 20 h, The reaction mixture was quenched by water (10 mL) and extracted by ethyl acetate (15 mL) for 3 times. The combined organic layers were dried over anhydrous Na<sub>2</sub>SO<sub>4</sub>. After filtration, the filtrate was concentrated in *vacuo* before it was purified by flash chromatography (PE/EA = 50/1) on silica gel to afford **13** (78.6 mg, 0.36 mmol, 90% yield) as a yellow oil. <sup>1</sup>H NMR (400 MHz, Chloroform-*d*) δ 7.61 – 7.53 (m, 4H), 7.46 – 7.39 (m, 2H), 7.37 – 7.30 (m, 1H), 7.27 (d, *J* = 8.4 Hz, 2H), 3.76 (q, *J* = 6.8 Hz, 1H), 2.37 (d, *J* = 15.6 Hz, 1H), 2.22 (d, *J* = 15.6 Hz, 1H), 1.39 (d, *J* = 6.8 Hz, 3H), 0.97 (s, 9H); <sup>13</sup>C NMR (101 MHz, Chloroform-*d*) δ 210.3, 140.6, 139.9, 139.5, 128.7, 128.4, 127.5, 127.3, 127.0, 54.0, 53.4, 31.0, 29.6, 17.5; HRMS (ESI-TOF) Calcd for C<sub>15</sub>H<sub>22</sub>ONa [M+Na]<sup>+</sup>: 241.1563; Found 241.1559.

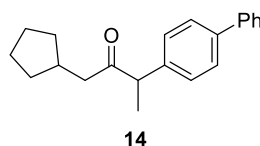

3-([1,1'-biphenyl]-4-yl)-1-cyclopentylbutan-2-one (**14**). Prepared according to the general procedure A employing Ir(ppy)<sub>2</sub>(dtbbpy)PF<sub>6</sub> (2.9 mg, 0.003 mmol), dtbbpy (L<sub>1</sub>) (6.0 mg, 0.0225 mmol), K<sub>2</sub>CO<sub>3</sub> (54.0 mg,

0.39 mmol), Cs<sub>2</sub>CO<sub>3</sub> (147.1 mg, 0.45 mmol), NiBr<sub>2</sub>•DME (4.8 mg, 0.015 mmol), NHC (177.2 mg, 0.45 mmol), 1,4-dioxane (3 mL), 1-(4-methylphenyl)ethanol (83.4 mg, 0.42 mmol), pyridine (33.3 mg, 0.42 mmol), 2-cyclopentylacetic acid (38.5 mg, 0.3 mmol) and Boc<sub>2</sub>O (85.2 mg, 0.39 mmol). After 20 h, The reaction mixture was quenched by water (10 mL) and extracted by ethyl acetate (15 mL) for 3 times. The combined organic layers were dried over anhydrous Na<sub>2</sub>SO<sub>4</sub>. After filtration, the filtrate was concentrated in *vacuo* before it was purified by flash chromatography (PE/EA = 45/1) on silica gel to afford **14** (47.3 mg, 0.162 mmol, 54% yield) as a yellow oil. <sup>1</sup>H NMR (400 MHz, Chloroform-*d*) δ 7.61 – 7.53 (m, 4H), 7.43 (t, *J* = 7.8 Hz, 2H), 7.37 – 7.31 (m, 1H), 7.28 (d, *J* = 8.4 Hz, 2H), 3.79 (q, *J* = 7.0 Hz, 1H), 2.48-2.34 (m, 2H), 2.29 – 2.14 (m, 1H), 1.86 – 1.66 (m, 2H), 1.56 – 1.45 (m, 4H), 1.41 (d, *J* = 7.2 Hz, 3H), 1.07 – 0.83 (m, 2H); <sup>13</sup>C NMR (101 MHz, Chloroform-*d*) δ 210.7, 140.6, 139.9, 139.7, 128.8, 128.3, 127.5, 127.3, 127.0, 52.7, 47.4, 35.5, 32.6, 32.3, 24.9,

24.8, 17.5; HRMS (ESI-TOF) Calcd for C<sub>21</sub>H<sub>24</sub>ONa [M+Na]<sup>+</sup>: 315.1719; Found 315.1721.

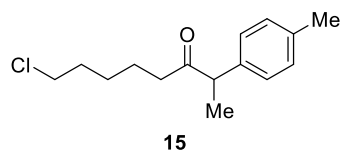

8-chloro-2-(*p*-tolyl)octan-3-one (**15**). Prepared according to the general procedure B employing Ir(ppy)<sub>2</sub>(dtbbpy)PF<sub>6</sub> (3.8 mg, 0.004 mmol), dtbbpy (L<sub>1</sub>) (8.3 mg, 0.03 mmol), K<sub>2</sub>CO<sub>3</sub> (72.0 mg, 0.60 mmol), Cs<sub>2</sub>CO<sub>3</sub> (196.0 mg, 0.60 mmol), NiBr<sub>2</sub>•DME (6.5 mg, 0.02 mmol), NHC (237.6 mg, 0.60 mmol), 1,4-dioxane (4 mL), 1-(4-methylphenyl)ethanol (76.7 mg, 0.56 mmol), pyridine (44.3 mg, 0.56 mmol), 6-chlorohexanoic acid (60.5 mg, 0.4 mmol) and Boc<sub>2</sub>O (114.0 mg, 0.52 mmol). After 20 h, The reaction mixture was quenched by water (10 mL) and extracted by ethyl acetate (15 mL) for 3 times. The combined organic layers were dried over anhydrous Na<sub>2</sub>SO<sub>4</sub>. After filtration, the filtrate was concentrated in *vacuo* before it was purified by flash chromatography (PE/EA = 50/1 to 30/1) on silica gel to afford **15** (64.6 mg, 0.256 mmol, 64% yield) as a colorless oil. <sup>1</sup>H NMR (400 MHz, Chloroform-*d*) δ 7.17 – 7.05 (m, 4H), 3.70 (q, *J* = 6.8 Hz, 1H), 3.45 (t, *J* = 6.8 Hz, 2H), 2.45–2.27 (m, 5H), 1.72–1.61 (m, 2H), 1.56 – 1.45 (m, 2H), 1.36 (d, *J* = 6.8 Hz, 3H), 1.34 – 1.26 (m, 2H); <sup>13</sup>C NMR (101 MHz, Chloroform-*d*) δ 210.8, 137.6, 136.8, 129.6, 127.7, 52.6, 44.8, 40.5, 32.3, 26.2, 23.0, 21.0, 17.4; HRMS (ESI-TOF) Calcd for C<sub>15</sub>H<sub>21</sub>ClONa [M+Na]<sup>+</sup>: 275.1173; Found 275.1185.

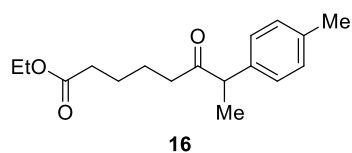

ethyl 6-oxo-7-(*p*-tolyl)octanoate (**16**). Prepared according to the general procedure A employing Ir(ppy)<sub>2</sub>(dtbbpy)PF<sub>6</sub> (2.9 mg, 0.003 mmol), dtbbpy (L<sub>1</sub>) (6.3 mg, 0.0225 mmol), K<sub>2</sub>CO<sub>3</sub> (53.9 mg, 0.39 mmol), Cs<sub>2</sub>CO<sub>3</sub> (147.0 mg, 0.45 mmol), NiBr<sub>2</sub>•DME (4.8 mg, 0.015 mmol), NHC (177.4 mg, 0.45 mmol), 1,4-dioxane (3 mL), 1-(4-methylphenyl)ethanol (57.8 mg, 0.42 mmol), pyridine (33.3 mg, 0.42 mmol), 6-ethoxy-6-oxohexanoic acid (52.4 mg, 0.3 mmol) and Boc<sub>2</sub>O (85.2 mg, 0.39 mmol). After 20 h, The reaction mixture was quenched by water (10 mL) and extracted by ethyl acetate (15 mL) for 3 times. The combined organic layers were dried over anhydrous Na<sub>2</sub>SO<sub>4</sub>. After filtration, the filtrate was concentrated in *vacuo* before it was purified by flash chromatography (PE/EA = 25/1) on silica gel to afford **16** (67.0 mg, 0.243 mmol, 81% yield) as a colorless oil. <sup>1</sup>H NMR (400 MHz, Chloroform-*d*) δ 7.16 – 7.04 (m, 4H), 4.09 (q, *J* = 7.1 Hz, 2H), 3.70 (q, *J* = 7.0 Hz, 1H), 2.41 – 2.28 (m, 5H), 2.24 – 2.15 (m, 2H), 1.58 – 1.44 (m, 4H), 1.36 (d, *J* = 7.2 Hz, 3H),

1.23 (t,  $J = 7.2$  Hz, 3H);  $^{13}\text{C}$  NMR (101 MHz, Chloroform- $d$ )  $\delta$  210.5, 173.3, 137.5, 136.7, 129.5, 127.6, 60.1, 52.5, 40.3, 33.9, 24.2, 23.2, 20.9, 17.3, 14.1; HRMS (ESI-TOF) Calcd for  $\text{C}_{17}\text{H}_{24}\text{O}_3\text{Na}$   $[\text{M}+\text{Na}]^+$ : 299.1618; Found 299.1627.

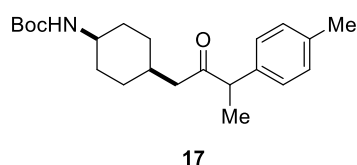

**17**

*tert*-butyl ((1s,4s)-4-(2-oxo-3-(*p*-tolyl)butyl)cyclohexyl)carbamate (**17**). Prepared according to the general procedure B employing  $\text{Ir}(\text{ppy})_2(\text{dtbbpy})\text{PF}_6$  (3.8 mg,

0.004 mmol), dtbbpy ( $\text{L}_1$ ) (8.3 mg, 0.03 mmol),  $\text{K}_2\text{CO}_3$  (72.0 mg, 0.60 mmol),  $\text{Cs}_2\text{CO}_3$  (196.0 mg, 0.60 mmol),  $\text{NiBr}_2\cdot\text{DME}$  (6.5 mg, 0.02 mmol), NHC (237.6 mg, 0.60 mmol), 1,4-dioxane (4 mL), 1-(4-methylphenyl)ethanol (76.3 mg, 0.56 mmol), pyridine (44.3 mg, 0.56 mmol), 2-(*cis*-4-((*tert*-butoxycarbonyl)amino)cyclohexyl)acetic acid (102.8 mg, 0.4 mmol) and  $\text{Boc}_2\text{O}$  (114.0 mg, 0.52 mmol). After 20 h, The reaction mixture was quenched by water (10 mL) and extracted by ethyl acetate (15 mL) for 3 times. The combined organic layers were dried over anhydrous  $\text{Na}_2\text{SO}_4$ . After filtration, the filtrate was concentrated in *vacuo* before it was purified by flash chromatography (PE/EA = 50/1 to 30/1) on silica gel to afford **17** (103.5 mg, 0.288 mmol, 72% yield) as a yellow oil. The *dr* could not be determined through  $^1\text{H}$  NMR analysis.  $^1\text{H}$  NMR (400 MHz, Chloroform- $d$ )  $\delta$  7.13 (d,  $J = 8.0$  Hz, 2H), 7.07 (d,  $J = 8.0$  Hz, 2H), 4.59 (s, 1H), 3.67 (q,  $J = 6.8$  Hz, 2H), 2.33 (s, 3H), 2.29 – 2.24 (m, 2H), 1.99-1.83 (m, 1H), 1.61-1.38 (m, 17H), 1.35 (d,  $J = 6.8$  Hz, 3H);  $^{13}\text{C}$  NMR (101 MHz, Chloroform- $d$ )  $\delta$  210.0, 155.0, 137.3, 136.7, 129.5, 127.6, 78.9, 52.9, 46.5, 31.4, 29.5, 28.3, 27.6, 20.9, 17.2; HRMS (ESI-TOF) Calcd for  $\text{C}_{22}\text{H}_{33}\text{NO}_3\text{Na}$   $[\text{M}+\text{Na}]^+$ : 382.2353; Found 382.2359.

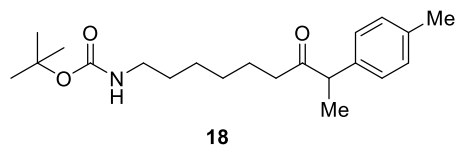

**18**

*tert*-butyl (7-oxo-8-(*p*-tolyl)nonyl)carbamate (**18**). Prepared according to the general procedure B employing  $\text{Ir}(\text{ppy})_2(\text{dtbbpy})\text{PF}_6$  (3.8 mg, 0.004 mmol),

dtbbpy ( $\text{L}_1$ ) (8.3 mg, 0.03 mmol),  $\text{K}_2\text{CO}_3$  (72.0 mg, 0.60 mmol),  $\text{Cs}_2\text{CO}_3$  (196.0 mg, 0.60 mmol),  $\text{NiBr}_2\cdot\text{DME}$  (6.5 mg, 0.02 mmol), NHC (237.5 mg, 0.60 mmol), 1,4-dioxane (4 mL), 1-(4-methylphenyl)ethanol (76.3 mg, 0.56 mmol), pyridine (44.3 mg, 0.56 mmol), 7-((*tert*-

butoxycarbonyl)amino) heptanoic acid (98.1 mg, 0.4 mmol) and  $\text{Boc}_2\text{O}$  (114.1 mg, 0.52 mmol). After 20 h, The reaction mixture was quenched by water (10 mL) and extracted by ethyl acetate (15 mL) for 3 times. The combined organic layers were dried over anhydrous  $\text{Na}_2\text{SO}_4$ . After filtration, the filtrate was concentrated in *vacuo* before it was purified by flash chromatography (PE/EA = 10/1) on silica gel to afford **18** (86.1 mg, 0.248 mmol, 62% yield) as a colorless oil.  $^1\text{H}$  NMR (400 MHz, Chloroform-*d*)  $\delta$  7.07 (d,  $J$  = 8.8 Hz, 2H), 7.03 (d,  $J$  = 8.0 Hz, 2H), 6.95 (d,  $J$  = 8.0 Hz, 2H), 6.82 (d,  $J$  = 8.4 Hz, 2H), 3.78 (s, 3H), 3.64 (q,  $J$  = 6.8 Hz, 1H), 2.85 – 2.55 (m, 4H), 2.28 (s, 3H), 1.34 (d,  $J$  = 7.2 Hz, 3H);  $^{13}\text{C}$  NMR (101 MHz, Chloroform-*d*)  $\delta$  210.3, 158.6, 138.0, 135.4, 132.5, 129.0, 128.8, 128.1, 114.2, 55.2, 52.2, 42.6, 29.5, 20.9, 17.3; HRMS (ESI-TOF) Calcd for  $\text{C}_{21}\text{H}_{33}\text{NO}_3\text{Na}$   $[\text{M}+\text{Na}]^+$ : 370.2353; Found 370.2360.

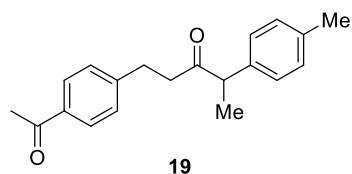

1-(4-acetylphenyl)-4-(*p*-tolyl)pentan-3-one (**19**). *tert*-butyl (7-oxo-8-(*p*-tolyl)nonyl)carbamate (**18**). Prepared according to the general procedure B employing  $\text{Ir}(\text{ppy})_2(\text{dtbbpy})\text{PF}_6$  (3.7 mg, 0.004 mmol), dtbbpy ( $\text{L}_1$ ) (8.3 mg, 0.03 mmol),  $\text{K}_2\text{CO}_3$  (71.5 mg, 0.60 mmol),  $\text{Cs}_2\text{CO}_3$  (196.0 mg, 0.60 mmol),  $\text{NiBr}_2\cdot\text{DME}$  (6.5 mg, 0.02 mmol), NHC (236.9 mg, 0.60 mmol), 1,4-dioxane (4 mL), 1-(4-methylphenyl)ethanol (76.3 mg, 0.56 mmol), pyridine (44.3 mg, 0.56 mmol), 3-(4-acetylphenyl)propanoic acid (77.0 mg, 0.4 mmol) and  $\text{Boc}_2\text{O}$  (113.5 mg, 0.52 mmol). After 20 h, The reaction mixture was quenched by water (10 mL) and extracted by ethyl acetate (15 mL) for 3 times. The combined organic layers were dried over anhydrous  $\text{Na}_2\text{SO}_4$ . After filtration, the filtrate was concentrated in *vacuo* before it was purified by flash chromatography (PE/EA = 15/1) on silica gel to afford **19** (68.2 mg, 0.232 mmol, 58% yield) as a yellow oil.  $^1\text{H}$  NMR (400 MHz, Chloroform-*d*)  $\delta$  7.80 (d,  $J$  = 8.0 Hz, 2H), 7.13 (d,  $J$  = 8.0 Hz, 2H), 7.09 (d,  $J$  = 8.0 Hz, 2H), 7.02 (d,  $J$  = 8.0 Hz, 2H), 3.67 (q,  $J$  = 6.8 Hz, 1H), 2.93 – 2.78 (m, 2H), 2.77 – 2.60 (m, 2H), 2.55 (s, 3H), 2.31 (s, 3H), 1.35 (d,  $J$  = 7.2 Hz, 3H);  $^{13}\text{C}$  NMR (101 MHz, Chloroform-*d*)  $\delta$  209.3, 197.6, 146.8, 137.1, 136.8, 135.0, 129.5, 128.42, 128.40, 127.6, 52.7, 41.6, 29.7, 26.4, 20.9, 17.2; HRMS (ESI-TOF) Calcd for  $\text{C}_{20}\text{H}_{22}\text{O}_2\text{Na}$   $[\text{M}+\text{Na}]^+$ : 317.1512; Found 317.1519.

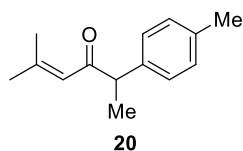

5-methyl-2-(*p*-tolyl)hex-4-en-3-one (**20**). Prepared according to the general procedure B employing Ir(ppy)<sub>2</sub>(dtbbpy)PF<sub>6</sub> (3.8 mg, 0.004 mmol), dtbbpy (L<sub>1</sub>) (8.2 mg, 0.03 mmol), K<sub>2</sub>CO<sub>3</sub> (71.5 mg, 0.60 mmol), Cs<sub>2</sub>CO<sub>3</sub> (195.9 mg,

0.60 mmol), NiBr<sub>2</sub>•DME (6.5 mg, 0.02 mmol), NHC (237.3 mg, 0.60 mmol), 1,4-dioxane (4 mL), 1-(4-methylphenyl)ethanol (76.7 mg, 0.56 mmol), pyridine (44.3 mg, 0.56 mmol), 3-methylbut-2-enoic acid (40.0 mg, 0.4 mmol) and Boc<sub>2</sub>O (113.4 mg, 0.52 mmol). After 20 h, The reaction mixture was quenched by water (10 mL) and extracted by ethyl acetate (15 mL) for 3 times. The combined organic layers were dried over anhydrous Na<sub>2</sub>SO<sub>4</sub>. After filtration, the filtrate was concentrated in *vacuo* before it was purified by flash chromatography (PE/EA = 50/1) on silica gel to afford **20** (66.3 mg, 0.328 mmol, 82% yield) as a yellow oil. <sup>1</sup>H NMR (400 MHz, Chloroform-*d*) δ 7.17 – 7.07 (m, 4H), 5.99 (s, 1H), 3.70 (q, *J* = 6.8 Hz, 1H), 2.32 (s, 3H), 2.14 (s, 3H), 1.79 (s, 3H), 1.37 (d, *J* = 6.8 Hz, 3H); <sup>13</sup>C NMR (101 MHz, Chloroform-*d*) δ 200.5, 156.0, 138.2, 136.4, 129.5, 127.8, 123.0, 53.1, 27.7, 21.0, 20.8, 17.6; HRMS (ESI-TOF) Calcd for C<sub>14</sub>H<sub>18</sub>O Na [M+Na]<sup>+</sup>: 225.1250; Found 225.1254.

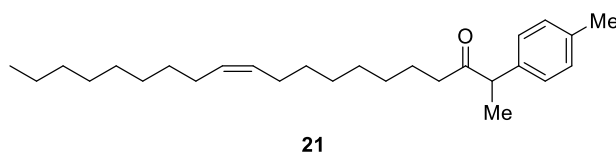

(*Z*)-2-(*p*-tolyl)icos-11-en-3-one (**21**).

Prepared according to the general procedure B employing

Ir(ppy)<sub>2</sub>(dtbbpy)PF<sub>6</sub> (3.9 mg, 0.004 mmol), dtbbpy (L<sub>1</sub>) (8.3 mg, 0.03 mmol), K<sub>2</sub>CO<sub>3</sub> (71.7 mg, 0.60 mmol), Cs<sub>2</sub>CO<sub>3</sub> (195.8 mg, 0.60 mmol), NiBr<sub>2</sub>•DME (6.5 mg, 0.02 mmol), NHC (238.0 mg, 0.60 mmol), 1,4-dioxane (4 mL), 1-(4-methylphenyl)ethanol (76.6 mg, 0.56 mmol), pyridine (44.3 mg, 0.56 mmol), (9*Z*)-9-Octadecenoic acid (113.1 mg, 0.4 mmol) and Boc<sub>2</sub>O (113.8 mg, 0.52 mmol). After 20 h, The reaction mixture was quenched by water (10 mL) and extracted by ethyl acetate (15 mL) for 3 times. The combined organic layers were dried over anhydrous Na<sub>2</sub>SO<sub>4</sub>. After filtration, the filtrate was concentrated in *vacuo* before it was purified by flash chromatography (PE/EA = 40/1) on silica gel to afford **21** (115.0 mg, 0.299 mmol, 75% yield) as a colorless oil. <sup>1</sup>H NMR (400 MHz, Chloroform-*d*) δ 7.12 (d, *J* = 8.0 Hz, 2H), 7.09 (d, *J* = 8.0 Hz, 2H), 5.39 – 5.26 (m, 2H), 3.70 (q, *J* = 7.0 Hz, 1H), 2.41 – 2.24 (m, 5H), 2.08 – 1.88 (m, 4H), 1.55-1.41 (m, 2H), 1.40 – 1.06 (m, 23H), 0.88 (t, *J* = 6.8 Hz, 3H); <sup>13</sup>C NMR (101 MHz, Chloroform-*d*) δ 211.0, 137.7, 136.6, 129.8, 129.7, 129.5, 127.6, 52.5, 40.8, 31.8, 29.7, 29.6, 29.5, 29.3, 29.2, 29.0, 28.9, 27.14, 27.10, 23.8, 22.6, 20.9,

17.4, 14.1; HRMS (ESI-TOF) Calcd for C<sub>27</sub>H<sub>44</sub>ONa [M+Na]<sup>+</sup>: 407.3284; Found 407.3293.

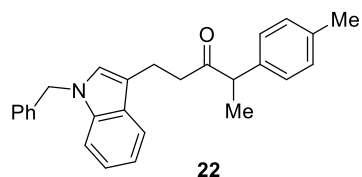

1-(1-benzyl-1H-indol-3-yl)-4-(p-tolyl)pentan-3-one (22).

Prepared according to the general procedure B employing Ir(ppy)<sub>2</sub>(dtbbpy)PF<sub>6</sub> (3.8 mg, 0.004 mmol), dtbbpy (L<sub>1</sub>) (8.4 mg, 0.03 mmol), K<sub>2</sub>CO<sub>3</sub> (71.8 mg, 0.60 mmol), Cs<sub>2</sub>CO<sub>3</sub> (195.0 mg, 0.60 mmol), NiBr<sub>2</sub>•DME (6.5 mg, 0.02 mmol), NHC (238.1 mg, 0.60 mmol), 1,4-dioxane (4 mL), 1-(4-methylphenyl)ethanol (76.6 mg, 0.56 mmol), pyridine (44.3 mg, 0.56 mmol), corresponding carboxylic acid (111.5 mg, 0.4 mmol) and Boc<sub>2</sub>O (113.7 mg, 0.52 mmol). After 20 h, The reaction mixture was quenched by water (10 mL) and extracted by ethyl acetate (15 mL) for 3 times. The combined organic layers were dried over anhydrous Na<sub>2</sub>SO<sub>4</sub>. After filtration, the filtrate was concentrated in *vacuo* before it was purified by flash chromatography (PE/EA = 30/1 to 20/1) on silica gel to afford **22** (57.0 mg, 0.150 mmol, 37% yield) as a colorless oil. <sup>1</sup>H NMR (400 MHz, Chloroform-*d*) δ 7.43 (d, *J* = 7.6 Hz, 1H), 7.29 – 7.16 (m, 4H), 7.12 (t, *J* = 7.6 Hz, 1H), 7.09 – 6.97 (m, 7H), 6.73 (s, 1H), 5.18 (s, 2H), 3.65 (q, *J* = 6.8 Hz, 1H), 3.05 – 2.84 (m, 2H), 2.83-2.65 (m, 2H), 2.29 (s, 3H), 1.33 (d, *J* = 7.2 Hz, 2H); <sup>13</sup>C NMR (101 MHz, Chloroform-*d*) δ 210.7, 137.6, 137.5, 136.7, 136.5, 129.5, 128.6, 127.8, 127.7, 127.4, 126.6, 125.5, 121.6, 118.9, 118.8, 114.4, 109.6, 52.7, 49.7, 41.4, 21.0, 19.5, 17.3; HRMS (ESI-TOF) Calcd for C<sub>27</sub>H<sub>27</sub>NONa [M+Na]<sup>+</sup>: 404.1985; Found 404.1993.

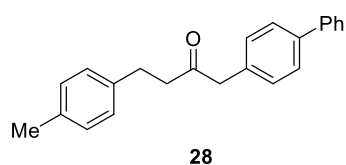

1-([1,1'-biphenyl]-4-yl)-4-(p-tolyl)butan-2-one (28). Prepared

according to the general procedure A employing Ir(ppy)<sub>2</sub>(dtbbpy)PF<sub>6</sub> (2.6 mg, 0.003 mmol), dtbbpy (L<sub>1</sub>) (6.1 mg, 0.0225 mmol), K<sub>2</sub>CO<sub>3</sub> (53.4 mg, 0.39 mmol), Cs<sub>2</sub>CO<sub>3</sub> (146.6 mg, 0.45 mmol), NiBr<sub>2</sub>•DME (4.7 mg, 0.015 mmol), NHC (177.5 mg, 0.45 mmol), 1,4-dioxane (3 mL), 4-biphenylmethanol (78.5 mg, 0.42 mmol), pyridine (33.3 mg, 0.42 mmol), 3-(4-methylphenyl)propionic acid (49.3 mg, 0.3 mmol) and Boc<sub>2</sub>O (85.2 mg, 0.39 mmol). After 20 h, The reaction mixture was quenched by water (10 mL) and extracted by ethyl acetate (15 mL) for 3 times. The combined organic layers were dried over anhydrous Na<sub>2</sub>SO<sub>4</sub>. After filtration, the filtrate was concentrated in *vacuo* before it was purified by

flash chromatography (PE/EA = 45/1) on silica gel to afford **28** (61.9 mg, 0.197 mmol, 62% yield) as a white solid. <sup>1</sup>H NMR (400 MHz, Chloroform-*d*) δ 7.57 (d, *J* = 7.2 Hz, 2H), 7.53 (d, *J* = 7.6 Hz, 2H), 7.43 (t, *J* = 7.6 Hz, 3H), 7.26 – 7.19 (m, 2H), 7.10–6.98 (m, 4H), 3.69 (s, 2H), 2.90 – 2.73 (m, 4H), 2.30 (s, 3H); <sup>13</sup>C NMR (101 MHz, Chloroform-*d*) δ 207.5, 140.8, 140.0, 137.8, 135.6, 133.1, 129.8, 129.2, 128.8, 128.2, 127.5, 127.3, 127.1, 50.0, 43.8, 29.4, 21.0; HRMS (ESI-TOF) Calcd for C<sub>23</sub>H<sub>22</sub>ONa [M+Na]<sup>+</sup>: 337.1563; Found 337.1572.

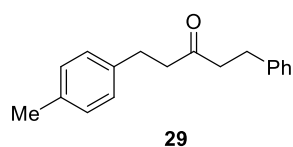

1-phenyl-5-(*p*-tolyl)pentan-3-one (**29**). Prepared according to the general procedure A employing Ir(ppy)<sub>2</sub>(dtbbpy)PF<sub>6</sub> (2.8 mg, 0.003 mmol), dtbbpy (L<sub>1</sub>) (6.1 mg, 0.0225 mmol), K<sub>2</sub>CO<sub>3</sub> (53.4 mg, 0.39 mmol), Cs<sub>2</sub>CO<sub>3</sub> (146.6 mg, 0.45 mmol), NiBr<sub>2</sub>•DME (4.7 mg, 0.015 mmol), NHC (177.5 mg, 0.45 mmol), 1,4-dioxane (3 mL), Phenethyl alcohol (51.1 mg, 0.42 mmol), pyridine (33.3 mg, 0.42 mmol), 3-(4-methylphenyl)propionic acid (50.0 mg, 0.3 mmol) and Boc<sub>2</sub>O (85.1 mg, 0.39 mmol). After 20 h, The reaction mixture was quenched by water (10 mL) and extracted by ethyl acetate (15 mL) for 3 times. The combined organic layers were dried over anhydrous Na<sub>2</sub>SO<sub>4</sub>. After filtration, the filtrate was concentrated in *vacuo* before it was purified by flash chromatography (PE/EA = 45/1) on silica gel to afford **29** (37.8 mg, 0.20 mmol, 50% yield) as a colorless oil. <sup>1</sup>H NMR (400 MHz, Chloroform-*d*) δ 7.26 (d, *J* = 7.8 Hz, 2H), 7.19 (d, *J* = 6.4 Hz, 1H), 7.15 (d, *J* = 8.0 Hz, 2H), 7.10–7.01 (m, 4H), 2.92–2.80 (m, 4H), 2.74–2.64 (m, 4H), 2.31 (s, 3H); <sup>13</sup>C NMR (101 MHz, Chloroform-*d*) δ 209.2, 141.0, 137.9, 135.6, 129.1, 128.5, 128.3, 128.1, 126.1, 44.6, 44.5, 29.7, 29.3, 21.0; HRMS (ESI-TOF) Calcd for C<sub>18</sub>H<sub>20</sub>ONa [M+Na]<sup>+</sup>: 275.1406; Found 275.1415.

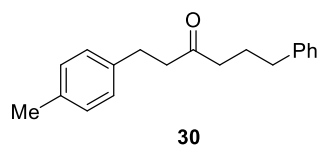

6-phenyl-1-(*p*-tolyl)hexan-3-one (**30**).<sup>5</sup> Prepared according to the general procedure A employing Ir(ppy)<sub>2</sub>(dtbbpy)PF<sub>6</sub> (2.8 mg, 0.003 mmol), dtbbpy (L<sub>1</sub>) (6.1 mg, 0.0225 mmol), K<sub>2</sub>CO<sub>3</sub> (53.4 mg, 0.39 mmol), Cs<sub>2</sub>CO<sub>3</sub> (146.6 mg, 0.45 mmol), NiBr<sub>2</sub>•DME (4.7 mg, 0.015 mmol), NHC (177.5 mg, 0.45 mmol), 1,4-dioxane (3 mL), 3-phenyl-1-propanol (56.9 mg, 0.42 mmol), pyridine (33.3 mg, 0.42 mmol), 3-(4-methylphenyl)propionic acid (50.0 mg, 0.3 mmol) and Boc<sub>2</sub>O (85.3 mg, 0.39 mmol). After 20 h, The reaction mixture was quenched by water (10 mL) and extracted by ethyl acetate (15

mL) for 3 times. The combined organic layers were dried over anhydrous Na<sub>2</sub>SO<sub>4</sub>. After filtration, the filtrate was concentrated in *vacuo* before it was purified by flash chromatography (PE/EA = 45/1) on silica gel to afford **30** (43.95 mg, 0.165 mmol, 55% yield) as a colorless oil. <sup>1</sup>H NMR (400 MHz, Chloroform-*d*) δ 7.30 – 7.24 (m, 2H), 7.19 (d, *J* = 7.2 Hz, 1H), 7.14 (dd, *J* = 7.2, 6.8 Hz, 2H), 7.11 – 7.02 (m, 4H), 2.83 (t, *J* = 7.6 Hz, 2H), 2.71 – 2.64 (m, 2H), 2.62 – 2.55 (m, 2H), 2.41–2.34 (m, 2H), 2.30 (s, 3H), 1.95 – 1.83 (m, 2H); <sup>13</sup>C NMR (101 MHz, Chloroform-*d*) δ 210.0, 141.6, 138.0, 135.5, 129.1, 128.4, 128.3, 128.1, 125.9, 44.4, 42.1, 35.0, 29.3, 25.1, 21.0.

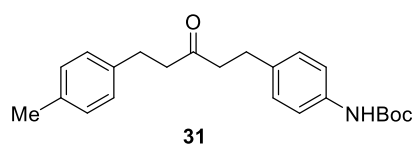

*tert*-butyl (4-(3-oxo-5-(*p*-tolyl)pentyl)phenyl)carbamate

**(31)**. Prepared according to the general procedure B employing Ir(ppy)<sub>2</sub>(dtbbpy)PF<sub>6</sub> (3.8 mg, 0.004 mmol), dtbbpy (L<sub>1</sub>) (8.4 mg, 0.03 mmol), K<sub>2</sub>CO<sub>3</sub> (71.8 mg, 0.60 mmol), Cs<sub>2</sub>CO<sub>3</sub> (195.0 mg, 0.60 mmol), NiBr<sub>2</sub>•DME (6.5 mg, 0.02 mmol), NHC (237.4 mg, 0.60 mmol), 1,4-dioxane (4 mL), *N*-Boc-2-(4-aminophenyl)ethanol (131.2 mg, 0.56 mmol), pyridine (44.3 mg, 0.56 mmol), 3-(4-methylphenyl)propionic acid (66.0 mg, 0.4 mmol) and Boc<sub>2</sub>O (113.6 mg, 0.52 mmol). After 20 h, The reaction mixture was quenched by water (10 mL) and extracted by ethyl acetate (15 mL) for 3 times. The combined organic layers were dried over anhydrous Na<sub>2</sub>SO<sub>4</sub>. After filtration, the filtrate was concentrated in *vacuo* before it was purified by flash chromatography (PE/EA = 10/1 to 5/1) on silica gel to afford **31** (58.8 mg, 0.160 mmol, 40% yield) as a colorless oil. <sup>1</sup>H NMR (400 MHz, Chloroform-*d*) δ 7.25 (d, *J* = 8.4 Hz, 2H), 7.11–7.00 (m, 6H), 6.49 (s, 1H), 2.87–2.77 (m, 4H), 2.71–2.61 (m, 4H), 2.30 (s, 3H), 1.51 (s, 9H); <sup>13</sup>C NMR (101 MHz, Chloroform-*d*) δ 209.3, 152.8, 137.8, 136.4, 135.6, 135.5, 129.1, 128.7, 128.1, 118.7, 80.3, 44.6, 44.5, 29.2, 29.0, 28.3, 20.9; HRMS (ESI-TOF) Calcd for C<sub>23</sub>H<sub>29</sub>NO<sub>3</sub>ONa [M+Na]<sup>+</sup>: 390.2040; Found 390.2046.

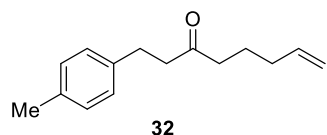

1-(*p*-tolyl)oct-7-en-3-one (**32**). Prepared according to the general procedure B employing Ir(ppy)<sub>2</sub>(dtbbpy)PF<sub>6</sub> (3.8 mg, 0.004 mmol), dtbbpy (L<sub>1</sub>) (8.1 mg, 0.03 mmol), K<sub>2</sub>CO<sub>3</sub> (69.7 mg, 0.60 mmol),

Cs<sub>2</sub>CO<sub>3</sub> (195.0 mg, 0.60 mmol), NiBr<sub>2</sub>•DME (6.5 mg, 0.02 mmol), NHC (238.1 mg, 0.60 mmol), 1,4-dioxane (4 mL), 4-penten-1-ol (47.6 mg, 0.56 mmol), pyridine (44.3 mg, 0.56 mmol), 3-(4-

methylphenyl)propionic acid (65.8 mg, 0.4 mmol) and  $\text{Boc}_2\text{O}$  (114.0 mg, 0.52 mmol). After 20 h, The reaction mixture was quenched by water (10 mL) and extracted by ethyl acetate (15 mL) for 3 times. The combined organic layers were dried over anhydrous  $\text{Na}_2\text{SO}_4$ . After filtration, the filtrate was concentrated in *vacuo* before it was purified by flash chromatography (PE/EA = 50/1 to 40/1) on silica gel to afford **32** (38.9 mg, 0.180 mmol, 45% yield) as a colorless oil.  $^1\text{H}$  NMR (400 MHz, Chloroform-*d*)  $\delta$  7.12 – 7.02 (m, 4H), 5.81 – 5.67 (m, 1H), 5.05 – 4.91 (m, 2H), 2.85 (t,  $J$  = 7.6 Hz, 2H), 2.70 (t,  $J$  = 7.6 Hz, 2H), 2.38 (t,  $J$  = 7.6 Hz, 2H), 2.31 (s, 3H), 2.03 (q,  $J$  = 7.2 Hz, 2H), 1.71 – 1.62 (m, 2H);  $^{13}\text{C}$  NMR (101 MHz, Chloroform-*d*)  $\delta$  210.1, 138.0, 137.9, 135.5, 129.1, 128.1, 115.2, 44.5, 42.1, 33.0, 29.3, 22.7, 20.9; HRMS (ESI-TOF) Calcd for  $\text{C}_{15}\text{H}_{20}\text{ONa}$   $[\text{M}+\text{Na}]^+$ : 239.1406; Found 239.1406.

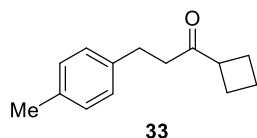

1-cyclobutyl-3-(*p*-tolyl)propan-1-one (**33**). Prepared according to the general procedure B employing  $\text{Ir}(\text{ppy})_2(\text{dtbbpy})\text{PF}_6$  (3.6 mg, 0.004 mmol), dtbbpy ( $\text{L}_1$ ) (8.4 mg, 0.03 mmol),  $\text{K}_2\text{CO}_3$  (71.8 mg, 0.60 mmol),  $\text{Cs}_2\text{CO}_3$  (195.0 mg, 0.60 mmol),  $\text{NiBr}_2\cdot\text{DME}$  (6.5 mg, 0.02 mmol), NHC (237.3 mg, 0.60 mmol), 1,4-dioxane (4 mL), cyclobutanol (39.3 mg, 0.56 mmol), pyridine (44.3 mg, 0.56 mmol), 3-(4-methylphenyl)propionic acid (66.5 mg, 0.4 mmol) and  $\text{Boc}_2\text{O}$  (113.7 mg, 0.52 mmol). After 20 h, The reaction mixture was quenched by water (10 mL) and extracted by ethyl acetate (15 mL) for 3 times. The combined organic layers were dried over anhydrous  $\text{Na}_2\text{SO}_4$ . After filtration, the filtrate was concentrated in *vacuo* before it was purified by flash chromatography (PE/EA = 45/1) on silica gel to afford **33** (32.3 mg, 0.160 mmol, 40% yield) as a colorless oil.  $^1\text{H}$  NMR (400 MHz, Chloroform-*d*)  $\delta$  7.10 – 7.03 (m, 4H), 3.22 (p,  $J$  = 8.0 Hz, 1H), 2.85 (t,  $J$  = 7.6 Hz, 2H), 2.65 (t,  $J$  = 7.6 Hz, 2H), 2.31 (s, 3H), 2.25 – 2.04 (m, 4H), 2.01 – 1.88 (m, 1H), 1.84 – 1.73 (m, 1H);  $^{13}\text{C}$  NMR (101 MHz, Chloroform-*d*)  $\delta$  211.1, 138.2, 135.5, 129.1, 128.1, 45.4, 41.7, 29.2, 24.2, 20.9, 17.7; HRMS (ESI-TOF) Calcd for  $\text{C}_{14}\text{H}_{18}\text{ONa}$   $[\text{M}+\text{Na}]^+$ : 225.1250; Found 225.1253.

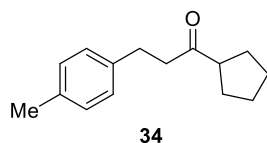

1-cyclopentyl-3-(*p*-tolyl)propan-1-one (**34**). Prepared according to the general procedure B employing  $\text{Ir}(\text{ppy})_2(\text{dtbbpy})\text{PF}_6$  (3.6 mg, 0.004 mmol), dtbbpy ( $\text{L}_1$ ) (8.4 mg, 0.03 mmol),  $\text{K}_2\text{CO}_3$  (71.8 mg, 0.60 mmol),

Cs<sub>2</sub>CO<sub>3</sub> (195.0 mg, 0.60 mmol), NiBr<sub>2</sub>•DME (6.5 mg, 0.02 mmol), NHC (237.3 mg, 0.60 mmol), 1,4-dioxane (4 mL), cyclopentanol (48.3 mg, 0.56 mmol), pyridine (44.3 mg, 0.56 mmol), 3-(4-methylphenyl)propionic acid (65.1 mg, 0.4 mmol) and Boc<sub>2</sub>O (113.5 mg, 0.52 mmol). After 20 h, The reaction mixture was quenched by water (10 mL) and extracted by ethyl acetate (15 mL) for 3 times. The combined organic layers were dried over anhydrous Na<sub>2</sub>SO<sub>4</sub>. After filtration, the filtrate was concentrated in *vacuo* before it was purified by flash chromatography (PE/EA = 60/1) on silica gel to afford **34** (44.1 mg, 0.204 mmol, 51% yield) as a colorless oil. <sup>1</sup>H NMR (400 MHz, Chloroform-*d*) δ 7.08 (s, 4H), 2.89 – 2.80 (m, 3H), 2.78 – 2.71 (m, 2H), 2.31 (s, 3H), 1.83 – 1.52 (m, 8H); <sup>13</sup>C NMR (101 MHz, Chloroform-*d*) δ 212.4, 138.3, 135.4, 129.1, 128.2, 51.5, 43.5, 29.4, 28.8, 25.9, 21.0; HRMS (ESI-TOF) Calcd for C<sub>15</sub>H<sub>20</sub>OONa [M+Na]<sup>+</sup>: 239.1406; Found 239.1409.

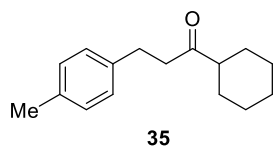

1-cyclohexyl-3-(*p*-tolyl)propan-1-one (**35**). Prepared according to the general procedure A employing Ir(ppy)<sub>2</sub>(dtbbpy)PF<sub>6</sub> (2.8 mg, 0.003 mmol), dtbbpy (L<sub>1</sub>) (6.1 mg, 0.0225 mmol), K<sub>2</sub>CO<sub>3</sub> (53.4 mg, 0.39 mmol),

Cs<sub>2</sub>CO<sub>3</sub> (146.6 mg, 0.45 mmol), NiBr<sub>2</sub>•DME (4.7 mg, 0.015 mmol), NHC (177.3 mg, 0.45 mmol), 1,4-dioxane (3 mL), cyclohexanol (42.2 mg, 0.42 mmol), pyridine (33.3 mg, 0.42 mmol), 3-(4-methylphenyl)propionic acid (49.5 mg, 0.3 mmol) and Boc<sub>2</sub>O (85.1 mg, 0.39 mmol). After 20 h, The reaction mixture was quenched by water (10 mL) and extracted by ethyl acetate (15 mL) for 3 times. The combined organic layers were dried over anhydrous Na<sub>2</sub>SO<sub>4</sub>. After filtration, the filtrate was concentrated in *vacuo* before it was purified by flash chromatography (PE/EA = 50/1) on silica gel to afford **35** (42.1 mg, 0.183 mmol, 61% yield) as a colorless oil. <sup>1</sup>H NMR (400 MHz, Chloroform-*d*) δ 7.10-7.03 (m, 4H), 2.87 – 2.79 (m, 2H), 2.77 – 2.63 (m, 2H), 2.36-2.24 (m, 4H), 1.89 – 1.72 (m, 4H), 1.67 – 1.62 (m, 1H), 1.38 – 1.16 (m, 5H); <sup>13</sup>C NMR (101 MHz, Chloroform-*d*) δ 213.2, 138.3, 135.4, 129.1, 128.1, 50.9, 42.3, 29.3, 28.4, 25.8, 25.6, 20.9; HRMS (ESI-TOF) Calcd for C<sub>16</sub>H<sub>22</sub>OONa [M+Na]<sup>+</sup>: 253.1563; Found 253.1570.

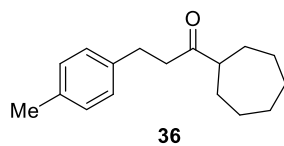

1-cycloheptyl-3-(*p*-tolyl)propan-1-one (**36**). Prepared according to the general procedure B employing Ir(ppy)<sub>2</sub>(dtbbpy)PF<sub>6</sub> (3.6 mg, 0.004 mmol), dtbbpy (L<sub>1</sub>) (8.4 mg, 0.03 mmol), K<sub>2</sub>CO<sub>3</sub> (71.8 mg, 0.60 mmol),

Cs<sub>2</sub>CO<sub>3</sub> (195.0 mg, 0.60 mmol), NiBr<sub>2</sub>•DME (6.5 mg, 0.02 mmol), NHC (237.3 mg, 0.60 mmol), 1,4-dioxane (4 mL), cycloheptanol (65.3 mg, 0.56 mmol), pyridine (44.3 mg, 0.56 mmol), 3-(4-methylphenyl)propionic acid (65.5 mg, 0.4 mmol) and Boc<sub>2</sub>O (113.3 mg, 0.52 mmol). After 20 h, The reaction mixture was quenched by water (10 mL) and extracted by ethyl acetate (15 mL) for 3 times. The combined organic layers were dried over anhydrous Na<sub>2</sub>SO<sub>4</sub>. After filtration, the filtrate was concentrated in *vacuo* before it was purified by flash chromatography (PE/EA = 60/1) on silica gel to afford **36** (48.8 mg, 0.20 mmol, 50% yield) as a colorless oil. <sup>1</sup>H NMR (400 MHz, Chloroform-*d*) δ 7.07 (s, 4H), 2.87 – 2.80 (m, 2H), 2.76 – 2.69 (m, 2H), 2.53–2.43 (m, 1H), 2.31 (s, 3H), 1.84 – 1.65 (m, 5H), 1.57 – 1.37 (m, 7H); <sup>13</sup>C NMR (101 MHz, Chloroform-*d*) δ 213.5, 138.3, 135.4, 129.1, 128.1, 52.4, 42.5, 29.7, 29.4, 28.2, 26.6, 20.9; HRMS (ESI-TOF) Calcd for C<sub>17</sub>H<sub>24</sub>ONa [M+Na]<sup>+</sup>: 267.1719; Found 267.1724.

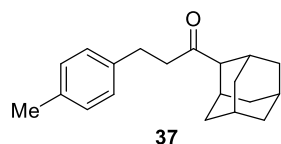

1-((1*R*,3*S*,5*r*,7*r*)-adamantan-2-yl)-3-(*p*-tolyl)propan-1-one (**37**).

Prepared according to the general procedure B employing Ir(ppy)<sub>2</sub>(dtbbpy)PF<sub>6</sub> (3.7 mg, 0.004 mmol), dtbbpy (L<sub>1</sub>) (8.4 mg, 0.03 mmol), K<sub>2</sub>CO<sub>3</sub> (71.8 mg, 0.60 mmol), Cs<sub>2</sub>CO<sub>3</sub> (195.0 mg, 0.60 mmol), NiBr<sub>2</sub>•DME (6.3 mg, 0.02 mmol), NHC (237.4 mg, 0.60 mmol), 1,4-dioxane (4 mL), 2-Adamantanol (85.3 mg, 0.56 mmol), pyridine (44.3 mg, 0.56 mmol), 3-(4-methylphenyl)propionic acid (65.7 mg, 0.4 mmol) and Boc<sub>2</sub>O (113.3 mg, 0.52 mmol). After 20 h, The reaction mixture was quenched by water (10 mL) and extracted by ethyl acetate (15 mL) for 3 times. The combined organic layers were dried over anhydrous Na<sub>2</sub>SO<sub>4</sub>. After filtration, the filtrate was concentrated in *vacuo* before it was purified by flash chromatography (PE/EA = 50/1) on silica gel to afford **37** (45.2 mg, 0.16 mmol, 40% yield) as a colorless oil. <sup>1</sup>H NMR (400 MHz, Chloroform-*d*) δ 7.08 (s, 1H), 2.86 (t, *J* = 7.6 Hz, 1H), 2.73 (t, *J* = 7.6 Hz, 1H), 2.46 (s, 0H), 2.35 (s, 1H), 2.31 (s, 1H), 1.94 – 1.67 (m, 3H), 1.60 (s, 1H); <sup>13</sup>C NMR (101 MHz, Chloroform-*d*) δ 212.0, 138.4, 135.4, 129.1, 128.2, 57.2, 41.6, 38.4, 37.2, 33.3, 29.4, 29.1, 27.6, 27.5, 21.0; HRMS (ESI-TOF) Calcd for C<sub>20</sub>H<sub>26</sub>ONa [M+Na]<sup>+</sup>: 305.1876; Found 305.1880.

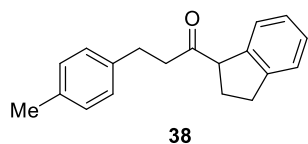

1-(2,3-dihydro-1*H*-inden-1-yl)-3-(*p*-tolyl)propan-1-one (**38**).

Prepared according to the general procedure B employing Ir(ppy)<sub>2</sub>(dtbbpy)PF<sub>6</sub> (3.8 mg, 0.004 mmol), dtbbpy (L<sub>1</sub>) (8.4 mg, 0.03 mmol), K<sub>2</sub>CO<sub>3</sub> (71.8 mg, 0.60 mmol), Cs<sub>2</sub>CO<sub>3</sub> (195.0 mg, 0.60 mmol), NiBr<sub>2</sub>•DME (6.3 mg, 0.02 mmol), NHC (237.3 mg, 0.60 mmol), 1,4-dioxane (4 mL), 1-indanol (75.3 mg, 0.56 mmol), pyridine (44.3 mg, 0.56 mmol), 3-(4-methylphenyl)propionic acid (65.7 mg, 0.4 mmol) and Boc<sub>2</sub>O (113.5 mg, 0.52 mmol). After 20 h, The reaction mixture was quenched by water (10 mL) and extracted by ethyl acetate (15 mL) for 3 times. The combined organic layers were dried over anhydrous Na<sub>2</sub>SO<sub>4</sub>. After filtration, the filtrate was concentrated in *vacuo* before it was purified by flash chromatography (PE/EA = 50/1) on silica gel to afford **38** (45.4 mg, 0.172 mmol, 43% yield) as a colorless oil. <sup>1</sup>H NMR (400 MHz, Chloroform-*d*) δ 7.25 – 7.11 (m, 4H), 7.07 (d, *J* = 8.0 Hz, 2H), 7.04 (d, *J* = 8.0 Hz, 2H), 4.07 (t, *J* = 7.2 Hz, 1H), 3.11-3.00 (m, 1H), 2.97 – 2.72 (m, 5H), 2.33 – 2.24 (m, 5H); <sup>13</sup>C NMR (101 MHz, Chloroform-*d*) δ 209.9, 144.6, 140.8, 138.0, 135.5, 129.1, 128.2, 127.5, 126.4, 124.9, 124.7, 58.3, 42.2, 31.9, 29.4, 28.5, 21.0; HRMS (ESI-TOF) Calcd for C<sub>19</sub>H<sub>20</sub>ONa [M+Na]<sup>+</sup>: 287.1406; Found 287.1415.

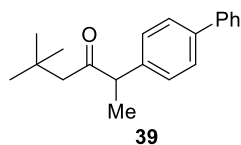

2-([1,1'-biphenyl]-4-yl)-5,5-dimethylhexan-3-one (**39**). Prepared according

to the general procedure A employing Ir(ppy)<sub>2</sub>(dtbbpy)PF<sub>6</sub> (2.8 mg, 0.003 mmol), dtbbpy (L<sub>1</sub>) (6.1 mg, 0.0225 mmol), K<sub>2</sub>CO<sub>3</sub> (53.4 mg, 0.39 mmol), Cs<sub>2</sub>CO<sub>3</sub> (146.6 mg, 0.45 mmol), NiBr<sub>2</sub>•DME (4.7 mg, 0.015 mmol), NHC (177.8 mg, 0.45 mmol), 1,4-dioxane (3 mL), 1-(4-biphenyl) ethanol (83.3 mg, 0.42 mmol), pyridine (33.3 mg, 0.42 mmol), *tert*-butyl acetic acid (35.1 mg, 0.3 mmol) and Boc<sub>2</sub>O (85.1 mg, 0.39 mmol). After 20 h, The reaction mixture was quenched by water (10 mL) and extracted by ethyl acetate (15 mL) for 3 times. The combined organic layers were dried over anhydrous Na<sub>2</sub>SO<sub>4</sub>. After filtration, the filtrate was concentrated in *vacuo* before it was purified by flash chromatography (PE/EA = 50/1) on silica gel to afford **39** (39.5 mg, 0.141 mmol, 47% yield) as a colorless oil. <sup>1</sup>H NMR (400 MHz, Chloroform-*d*) δ 7.61 – 7.53 (m, 4H), 7.46 – 7.39 (m, 2H), 7.37 – 7.30 (m, 1H), 7.27 (d, *J* = 8.4 Hz, 2H), 3.76 (q, *J* = 6.8 Hz, 1H), 2.37 (d, *J* = 15.6 Hz, 1H), 2.22 (d, *J* = 15.6 Hz, 1H), 1.39 (d, *J* = 6.8 Hz, 3H), 0.97 (s, 9H); <sup>13</sup>C NMR (101 MHz, Chloroform-*d*) δ 210.3, 140.6, 139.9, 139.5, 128.7, 128.4, 127.5,

127.3, 127.0, 54.0, 53.4, 31.0, 29.6, 17.5; HRMS (ESI-TOF) Calcd for  $C_{20}H_{24}ONa$   $[M+Na]^+$ : 303.1719; Found 303.1724.

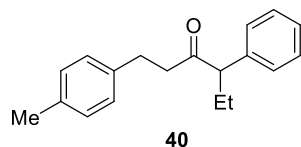

4-phenyl-1-(*p*-tolyl)hexan-3-one (**40**). Prepared according to the general procedure B employing  $Ir(ppy)_2(dtbbpy)PF_6$  (3.8 mg, 0.004 mmol),  $dtbbpy$  ( $L_1$ ) (8.4 mg, 0.03 mmol),  $K_2CO_3$  (71.8 mg, 0.60 mmol),  $Cs_2CO_3$  (195.0 mg, 0.60 mmol),  $NiBr_2 \cdot DME$  (6.3 mg, 0.02 mmol), NHC (236.9 mg, 0.60 mmol), 1,4-dioxane (4 mL), 1-Phenyl-1-propanol (76.3 mg, 0.56 mmol), pyridine (44.3 mg, 0.56 mmol), 3-(4-methylphenyl)propionic acid (65.8 mg, 0.4 mmol) and  $Boc_2O$  (113.5 mg, 0.52 mmol). After 20 h, The reaction mixture was quenched by water (10 mL) and extracted by ethyl acetate (15 mL) for 3 times. The combined organic layers were dried over anhydrous  $Na_2SO_4$ . After filtration, the filtrate was concentrated in *vacuo* before it was purified by flash chromatography (PE/EA = 50/1) on silica gel to afford **40** (67.2 mg, 0.24 mmol, 60% yield) as a colorless oil.  $^1H$  NMR (400 MHz, Chloroform-*d*)  $\delta$  7.32-7.20 (m, 3H), 7.15 (d,  $J$  = 7.2 Hz, 2H), 7.02 (d,  $J$  = 8.0 Hz, 2H), 6.94 (d,  $J$  = 7.6 Hz, 2H), 3.47 (t,  $J$  = 7.4 Hz, 1H), 2.86 – 2.56 (m, 4H), 2.28 (s, 3H), 2.11-1.97 (m, 1H), 1.77-1.62 (m, 1H), 0.79 (t,  $J$  = 7.6 Hz, 3H);  $^{13}C$  NMR (101 MHz, Chloroform-*d*)  $\delta$  209.7, 138.7, 137.8, 135.3, 129.0, 128.7, 128.2, 128.0, 127.1, 60.9, 43.5, 29.3, 25.0, 20.9, 12.0; HRMS (ESI-TOF) Calcd for  $C_{20}H_{24}ONa$   $[M+Na]^+$ : 303.1719; Found 303.1714.

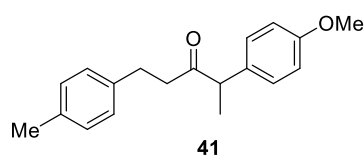

4-(4-methoxyphenyl)-1-(*p*-tolyl)pentan-3-one (**41**). Prepared according to the general procedure A employing  $Ir(ppy)_2(dtbbpy)PF_6$  (2.8 mg, 0.003 mmol),  $dtbbpy$  ( $L_1$ ) (6.1 mg, 0.0225 mmol),  $K_2CO_3$  (53.4 mg, 0.39 mmol),  $Cs_2CO_3$  (146.6 mg, 0.45 mmol),  $NiBr_2 \cdot DME$  (4.7 mg, 0.015 mmol), NHC (177.9 mg, 0.45 mmol), 1,4-dioxane (3 mL), 1-(4-methoxyphenyl)ethanol (63.9 mg, 0.42 mmol), pyridine (33.3 mg, 0.42 mmol), 3-(4-methylphenyl)propionic acid (49.5 mg, 0.3 mmol) and  $Boc_2O$  (85.1 mg, 0.39 mmol). After 20 h, The reaction mixture was quenched by water (10 mL) and extracted by ethyl acetate (15 mL) for 3 times. The combined organic layers were dried over anhydrous  $Na_2SO_4$ . After filtration, the filtrate was concentrated in *vacuo* before it was purified by flash chromatography (PE/EA = 50/1) on silica gel to afford **41** (52.5 mg, 0.186 mmol, 62%

yield) as a colorless oil.  $^1\text{H}$  NMR (400 MHz, Chloroform-*d*)  $\delta$  7.07 (d,  $J$  = 8.8 Hz, 2H), 7.03 (d,  $J$  = 8.0 Hz, 2H), 6.95 (d,  $J$  = 8.0 Hz, 2H), 6.82 (d,  $J$  = 8.4 Hz, 1H), 3.78 (s, 3H), 3.64 (q,  $J$  = 7.0 Hz, 1H), 2.85 – 2.55 (m, 4H), 2.28 (s, 3H), 1.34 (d,  $J$  = 7.2 Hz, 3H);  $^{13}\text{C}$  NMR (101 MHz, Chloroform-*d*)  $\delta$  210.3, 158.6, 138.0, 135.4, 132.5, 129.0, 128.8, 128.1, 114.2, 55.2, 52.2, 42.6, 29.5, 20.9, 17.3; HRMS (ESI-TOF) Calcd for  $\text{C}_{19}\text{H}_{22}\text{O}_2\text{Na}$   $[\text{M}+\text{Na}]^+$ : 305.1512; Found 305.1522.

#### IV. Late-stage Functionalization of Complex Molecules

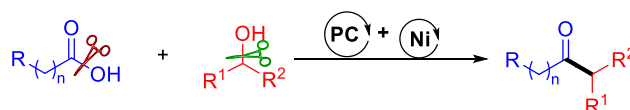

An oven-dried 25 mL flask was evacuated and back-filled with  $\text{N}_2$  for three times. After cooling at room temperature,  $\text{Ir}(\text{ppy})_2(\text{dtbbpy})\text{PF}_6$  (0.004 mmol), dtbbpy ( $\text{L}_1$ ) (0.03 mmol),  $\text{K}_2\text{CO}_3$  (0.52 mmol),  $\text{Cs}_2\text{CO}_3$  (0.60 mmol) and  $\text{NiBr}_2 \cdot \text{DME}$  (0.02 mmol) were added sequentially under  $\text{N}_2$ . Then DMAc (4 mL) was added. The reaction mixture was stirred at room temperature for 30 min.

Another oven-dried 10 mL flask was evacuated and back-filled with  $\text{N}_2$  for three times. After cooling at room temperature, NHC ( $\text{N}_4$ ) (0.60 mmol), 1,4-dioxane (4 mL) and alcohol (0.56 mmol) were added. Then pyridine (0.56 mmol) was added dropwise via a microsyringe. The reaction mixture was stirred for 20 min at room temperature. The 1,4-dioxane suspension was transferred to a 5 mL syringe under  $\text{N}_2$ . Then a syringe filter and a new needle were installed on the syringe, and the 1,4-dioxane solution was injected through the syringe filter into the mentioned above flask containing the Ir/Ni catalysts followed by adding carboxylic acid (0.4 mmol) and  $\text{Boc}_2\text{O}$  (0.52 mmol). The resulting crude mixture was then allowed to stir at room temperature and irradiated by 450–455 nm LEDs at a distance of 5 cm for 24 h at rt. The reaction mixture was quenched by water (10 mL) and extracted by ethyl acetate (15 mL) for 3 times. The combined organic layers were dried over anhydrous  $\text{Na}_2\text{SO}_4$ . After filtration, the filtrate was concentrated *in vacuo* before it was purified by flash chromatography on silica gel to afford the Late-stage functionalized ketone.

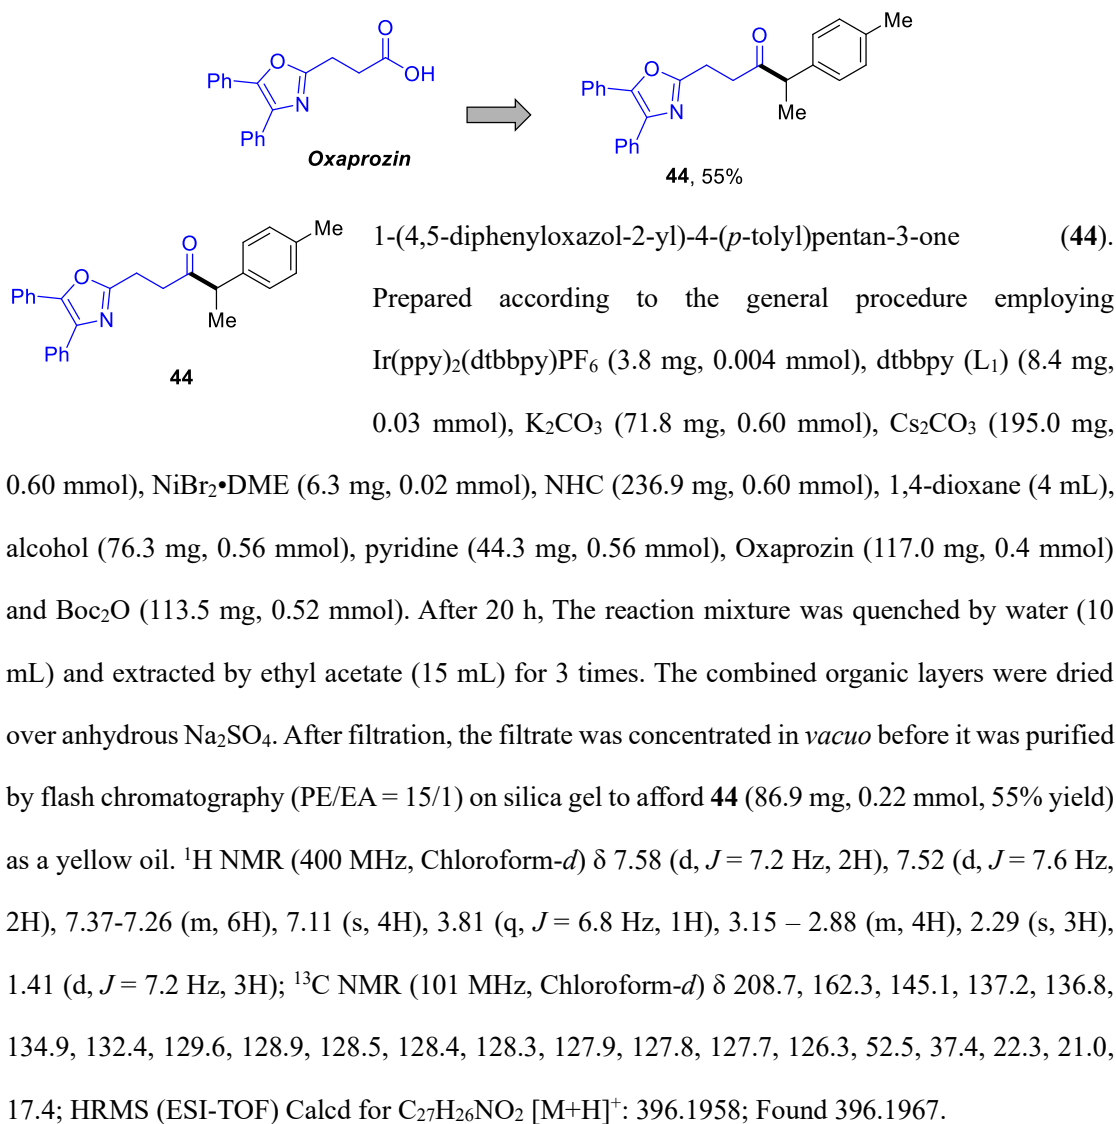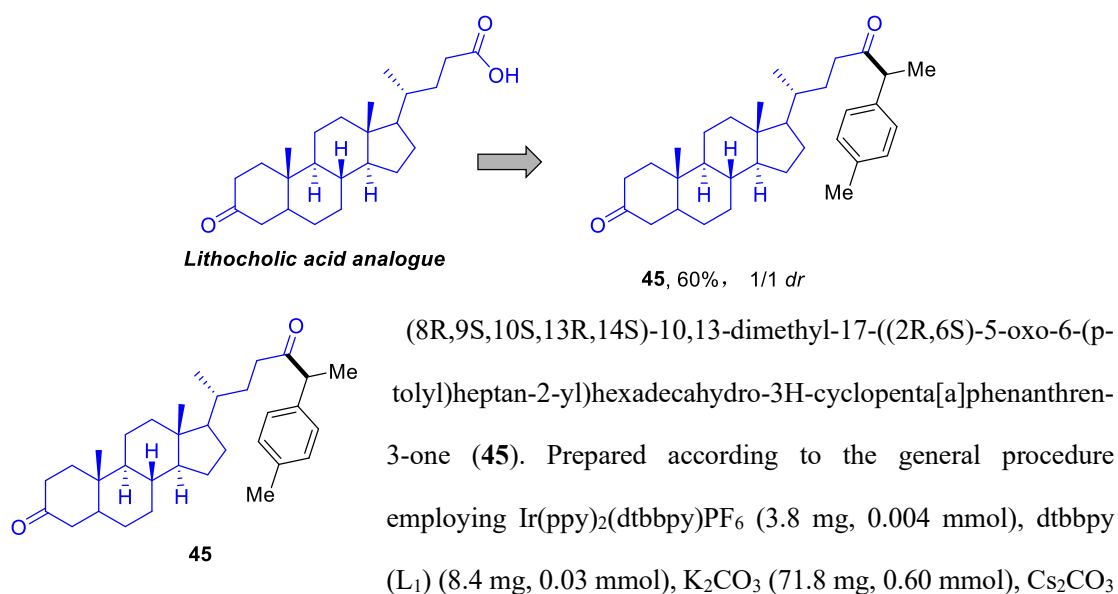

(195.0 mg, 0.60 mmol), NiBr<sub>2</sub>•DME (6.3 mg, 0.02 mmol), NHC (236.9 mg, 0.60 mmol), 1,4-dioxane (4 mL), 1-(4-Methylphenyl)ethanol (76.5 mg, 0.56 mmol), pyridine (44.3 mg, 0.56 mmol), Lithocholic acid analogue (149.9 mg, 0.4 mmol) and Boc<sub>2</sub>O (113.5 mg, 0.52 mmol). After 20 h, The reaction mixture was quenched by water (10 mL) and extracted by ethyl acetate (15 mL) for 3 times. The combined organic layers were dried over anhydrous Na<sub>2</sub>SO<sub>4</sub>. After filtration, the filtrate was concentrated in *vacuo* before it was purified by flash chromatography (PE/EA = 50/1 to 20/1) on silica gel to afford **45** (114.3 mg, 0.24 mmol, 60% yield, 1/1 *dr*) as a yellow oil. <sup>1</sup>H NMR (400 MHz, Chloroform-*d*) δ 7.13 (q, *J* = 8.0 Hz, 4H), 3.79 – 3.68 (m, 1H), 2.69 (t, *J* = 14.0 Hz, 1H), 2.45 – 2.22 (m, 6H), 2.21 – 1.76 (m, 7H), 1.51 – 1.11 (m, 17H), 1.09 – 0.98 (s, 6H), 0.80 (d, *J* = 6.4 Hz, 1.5H), 0.74 (d, *J* = 6.4 Hz, 1.5H), 0.63 (d, *J* = 6.4 Hz, 3H); <sup>13</sup>C NMR (101 MHz, Chloroform-*d*) δ 213.2, 211.6, 211.4, 137.7, 137.6, 136.6, 136.0, 129.4, 127.7, 127.6, 124.6, 56.30, 56.26, 56.0, 55.9, 52.6, 52.4, 44.2, 42.6, 42.3, 40.6, 39.9, 37.9, 37.7, 37.1, 36.9, 35.4, 35.2, 35.1, 34.8, 30.2, 29.9, 28.0, 27.9, 26.5, 25.7, 24.0, 22.6, 21.1, 20.9, 18.3, 18.1, 17.44, 17.42, 11.95, 11.93; HRMS (ESI-TOF) Calcd for C<sub>33</sub>H<sub>48</sub>O<sub>2</sub>Na [M+Na]<sup>+</sup>: 499.3547; Found 499.3554.

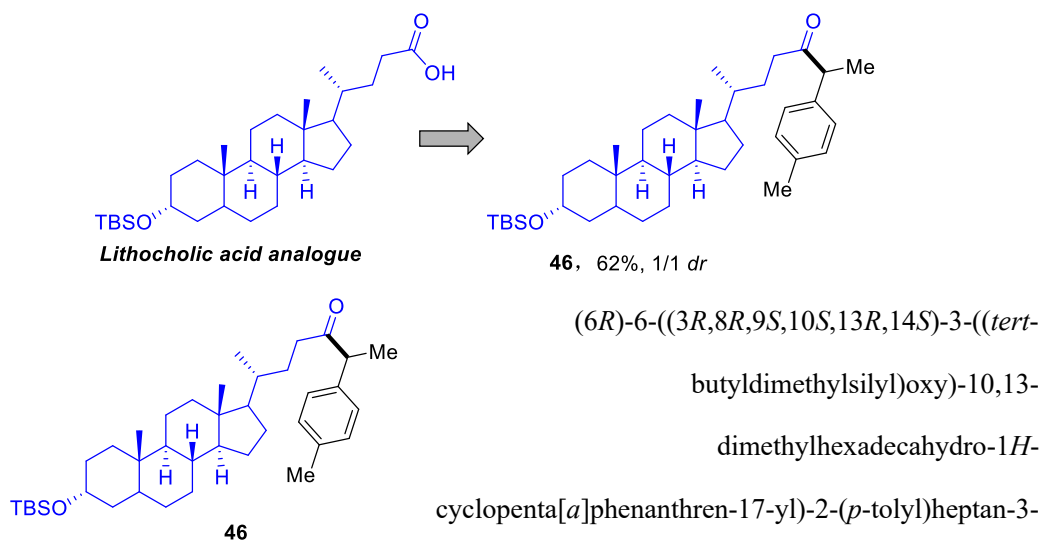

**(46)**. Prepared according to the general procedure employing Ir(ppy)<sub>2</sub>(dtbbpy)PF<sub>6</sub> (3.8 mg, 0.004 mmol), dtbbpy (L<sub>1</sub>) (8.4 mg, 0.03 mmol), K<sub>2</sub>CO<sub>3</sub> (71.8 mg, 0.60 mmol), Cs<sub>2</sub>CO<sub>3</sub> (195.0 mg, 0.60 mmol), NiBr<sub>2</sub>•DME (6.3 mg, 0.02 mmol), NHC (236.5 mg, 0.60 mmol), 1,4-dioxane (4 mL), 1-(4-Methylphenyl)ethanol (76.1 mg, 0.56 mmol), pyridine (44.3 mg, 0.56 mmol), corresponding Lithocholic acid analogue (196.4 mg, 0.4 mmol) and Boc<sub>2</sub>O (113.6 mg, 0.52 mmol). After 20 h, The reaction mixture was quenched by water (10 mL)

and extracted by ethyl acetate (15 mL) for 3 times. The combined organic layers were dried over anhydrous Na<sub>2</sub>SO<sub>4</sub>. After filtration, the filtrate was concentrated in *vacuo* before it was purified by flash chromatography (PE/EA = 15/1) on silica gel to afford **46** (146.9 mg, 0.248 mmol, 62% yield) as a colorless oil. <sup>1</sup>H NMR (400 MHz, Chloroform-*d*) δ 7.19 – 7.10 (m, 4H), 3.79-3.71 (m, 1H), 3.65 – 3.55 (m, 1H), 2.41 – 2.22 (m, 5H), 1.94 – 1.65 (m, 6H), 1.61 – 1.52 (m, 2H), 1.47 – 1.32 (m, 11H), 1.26 – 0.96 (m, 10H), 0.94 – 0.89 (m, 12H), 0.80 (d, *J* = 6.4 Hz, 1.5H), 0.74 (d, *J* = 6.4 Hz, 1.5H), 0.60 (d, *J* = 6.4 Hz, 3H), 0.09 (s, 6H); <sup>13</sup>C NMR (101 MHz, Chloroform-*d*) δ 211.7, 211.6, 137.70, 137.67, 136.6, 129.5, 127.72, 127.70, 72.8, 56.33, 56.29, 55.9, 55.8, 52.7, 52.4, 42.60, 42.59, 42.2, 40.1, 40.0, 37.9, 37.7, 36.9, 35.8, 35.5, 35.2, 35.1, 34.5, 31.0, 30.02, 29.99, 29.7, 28.1, 28.0, 27.2, 26.3, 25.9, 24.15, 24.13, 23.3, 21.02, 21.00, 20.7, 18.35, 18.30, 18.2, 17.49, 17.47, 11.94, 11.92, -4.6; HRMS (ESI-TOF) Calcd for C<sub>39</sub>H<sub>64</sub>O<sub>2</sub>SiNa [M+Na]<sup>+</sup>: 615.4568; Found 615.4576.

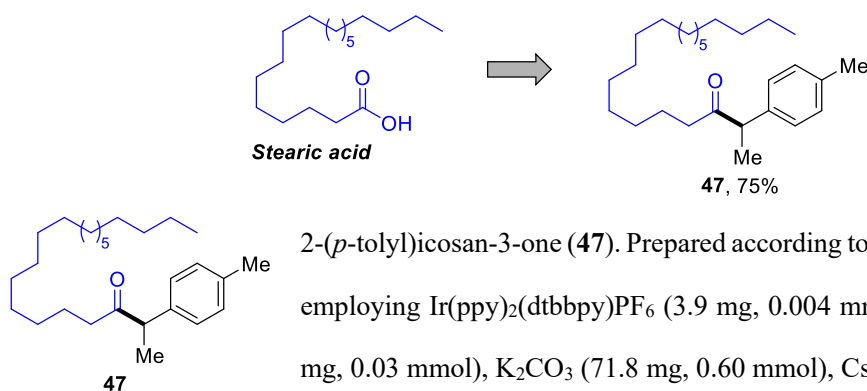

2-(*p*-tolyl)icosan-3-one (**47**). Prepared according to the general procedure employing Ir(ppy)<sub>2</sub>(dtbbpy)PF<sub>6</sub> (3.9 mg, 0.004 mmol), dtbbpy (L<sub>1</sub>) (8.4 mg, 0.03 mmol), K<sub>2</sub>CO<sub>3</sub> (71.8 mg, 0.60 mmol), Cs<sub>2</sub>CO<sub>3</sub> (196.0 mg, 0.60 mmol), NiBr<sub>2</sub>•DME (6.3 mg, 0.02 mmol), NHC (237.5 mg, 0.60 mmol), 1,4-dioxane (4 mL), 1-(4-Methylphenyl)ethanol (76.3 mg, 0.56 mmol), pyridine (44.3 mg, 0.56 mmol), stearic acid (113.6 mg, 0.4 mmol) and Boc<sub>2</sub>O (113.6 mg, 0.52 mmol). After 20 h, The reaction mixture was quenched by water (10 mL) and extracted by ethyl acetate (15 mL) for 3 times. The combined organic layers were dried over anhydrous Na<sub>2</sub>SO<sub>4</sub>. After filtration, the filtrate was concentrated in *vacuo* before it was purified by flash chromatography (PE/EA = 40/1) on silica gel to afford **47** (115.9 mg, 0.30 mmol, 75% yield) as a white solid. <sup>1</sup>H NMR (400 MHz, Chloroform-*d*) δ 7.13 (d, *J* = 8.0 Hz, 2H), 7.09 (d, *J* = 8.4 Hz, 2H), 3.70 (q, *J* = 6.8 Hz, 1H), 2.37 – 2.27 (m, 5H), 1.54 – 1.40 (m, 2H), 1.36 (d, *J* = 7.2 Hz, 3H), 1.33-1.06 (m, 28H), 0.88 (t, *J* = 7.2 Hz, 3H); <sup>13</sup>C NMR (101 MHz, Chloroform-*d*) δ 211.2, 137.7, 136.6, 129.5, 127.7, 52.5, 40.9, 31.9, 29.7, 29.65, 29.64, 29.62,

29.56, 29.4, 29.35, 29.30, 29.0, 23.8, 22.7, 21.0, 17.4, 14.1; HRMS (ESI-TOF) Calcd for C<sub>27</sub>H<sub>46</sub>ONa [M+Na]<sup>+</sup>: 409.3441; Found 409.3450.

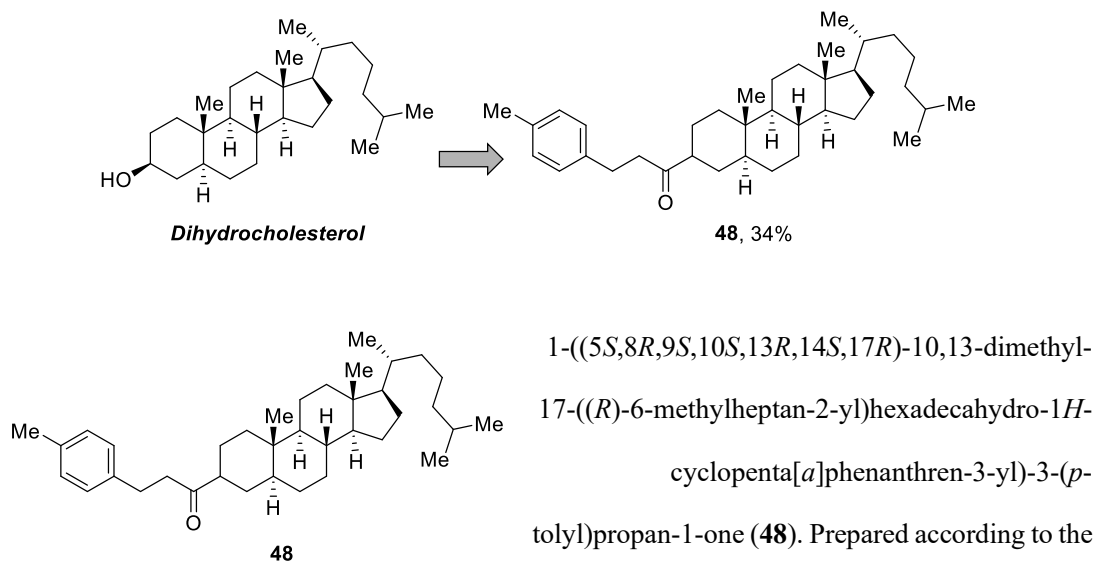

general procedure employing Ir(ppy)<sub>2</sub>(dtbbpy)PF<sub>6</sub> (3.9 mg, 0.004 mmol), dtbbpy (L<sub>1</sub>) (8.4 mg, 0.03 mmol), K<sub>2</sub>CO<sub>3</sub> (71.8 mg, 0.60 mmol), Cs<sub>2</sub>CO<sub>3</sub> (195.5 mg, 0.60 mmol), NiBr<sub>2</sub>•DME (6.3 mg, 0.02 mmol), NHC (237.4 mg, 0.60 mmol), 1,4-dioxane (4 mL), dihydrocholesterol (217.8 mg, 0.56 mmol), pyridine (44.3 mg, 0.56 mmol), 3-(4-methylphenyl)propan-1-one (66.0 mg, 0.4 mmol) and Boc<sub>2</sub>O (113.6 mg, 0.52 mmol). After 20 h, The reaction mixture was quenched by water (10 mL) and extracted by ethyl acetate (15 mL) for 3 times. The combined organic layers were dried over anhydrous Na<sub>2</sub>SO<sub>4</sub>. After filtration, the filtrate was concentrated in *vacuo* before it was purified by flash chromatography (PE/EA = 40/1) on silica gel to afford **48** (70.5 mg, 0.136 mmol, 34% yield) as a colorless oil. <sup>1</sup>H NMR (400 MHz, Chloroform-*d*) δ 7.07 (s, 4H), 2.89 – 2.78 (m, 2H), 2.78 – 2.66 (m, 2H), 2.53 – 2.44 (m, 1H), 2.30 (s, 3H), 2.00 – 1.89 (m, 2H), 1.85-1.73 (m, 2H), 1.69 – 1.60 (m, 3H), 1.58 – 1.42 (m, 7H), 1.38 -1.28 (m, 6H), 1.17 – 1.07 (m, 7H), 1.04-0.95 (m, 4H), 0.89 (d, *J* = 6.4 Hz, 3H), 0.86 (d, *J* = 6.4 Hz, 6H), 0.77 (d, *J* = 9.6 Hz, 3H), 0.63 (d, *J* = 6.4 Hz, 3H); <sup>13</sup>C NMR (101 MHz, Chloroform-*d*) δ 212.8, 138.4, 135.4, 129.1, 128.2, 56.4, 56.3, 56.2, 54.4, 54.1, 51.4, 46.9, 46.1, 42.54, 42.51, 42.3, 41.8, 39.9, 39.5, 36.1, 35.84, 35.79, 35.76, 35.4, 35.3, 34.9, 31.7, 29.6, 29.0, 28.8, 28.2, 28.0, 24.1, 23.8, 22.8, 22.5, 22.1, 20.9, 20.7, 18.65, 18.63, 12.2, 12.0, 11.6; HRMS (ESI-TOF) Calcd for C<sub>37</sub>H<sub>58</sub>ONa [M+Na]<sup>+</sup>: 541.4380; Found 541.4391.

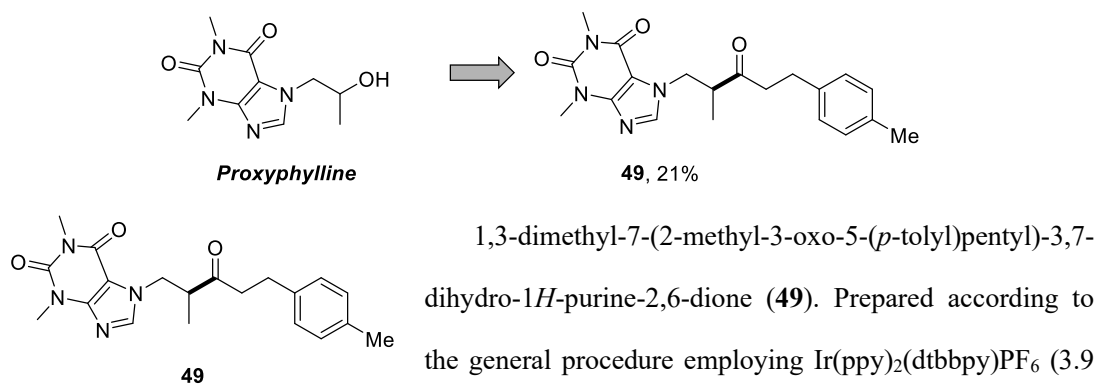

(71.8 mg, 0.60 mmol), Cs<sub>2</sub>CO<sub>3</sub> (195.5 mg, 0.60 mmol), NiBr<sub>2</sub>•DME (6.3 mg, 0.02 mmol), NHC (237.4 mg, 0.60 mmol), 1,4-dioxane (4 mL), Proxyphylline (135.0 mg, 0.56 mmol), pyridine (44.3 mg, 0.56 mmol), 3-(4-Methylphenyl)propionic acid (65.6 mg, 0.4 mmol) and Boc<sub>2</sub>O (113.6 mg, 0.52 mmol). After 20 h, The reaction mixture was quenched by water (10 mL) and extracted by ethyl acetate (15 mL) for 3 times. The combined organic layers were dried over anhydrous Na<sub>2</sub>SO<sub>4</sub>. After filtration, the filtrate was concentrated in *vacuo* before it was purified by flash chromatography (PE/EA = 40/1) on silica gel to afford **49** (30.9 mg, 0.084 mmol, 21% yield) as a colorless oil.

<sup>1</sup>H NMR (400 MHz, Chloroform-*d*) δ 7.56 (s, 1H), 7.01 (d, *J* = 7.8 Hz, 2H), 6.95 (d, *J* = 7.8 Hz, 2H), 4.47 (dd, *J* = 13.6, 8.8 Hz, 1H), 4.16 (dd, *J* = 13.2, 4.8 Hz, 1H), 3.58 (s, 3H), 3.40 (s, 3H), 3.33 – 3.18 (m, 1H), 2.86 – 2.72 (m, 3H), 2.68 – 2.51 (m, 1H), 2.27 (s, 3H), 1.14 (d, *J* = 7.6 Hz, 3H); <sup>13</sup>C NMR (101 MHz, Chloroform-*d*) δ 211.1, 155.1, 151.5, 148.9, 142.5, 137.2, 135.6, 129.0, 127.9, 106.5, 48.0, 46.8, 43.1, 29.8, 29.1, 27.9, 20.9, 14.6; HRMS (ESI-TOF) Calcd for C<sub>20</sub>H<sub>24</sub>N<sub>4</sub>O<sub>3</sub>Na [M+Na]<sup>+</sup>: 391.1741; Found 391.1749.

## V. Mechanistic Studies

**(a) Benzylic radical trapping experiments**

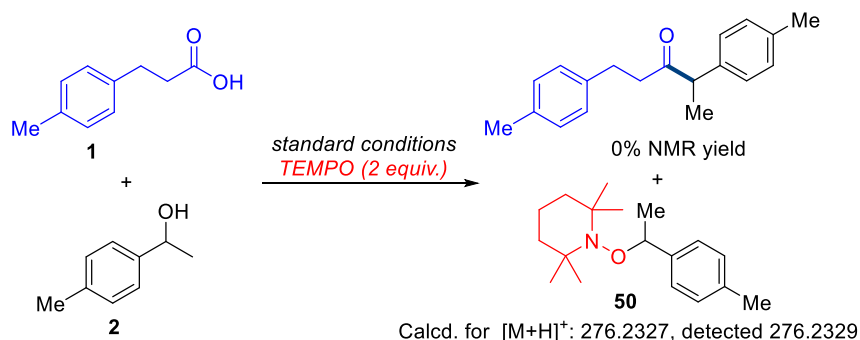

An oven-dried 25 mL flask was evacuated and back-filled with  $N_2$  for three times. After cooling at room temperature,  $Ir(ppy)_2(dtbbpy)PF_6$  (2.8 mg, 0.003 mmol),  $dtbbpy$  ( $L_1$ ) (6.3 mg, 0.0225 mmol),  $K_2CO_3$  (53.6 mg, 0.39 mmol),  $Cs_2CO_3$  (147.0 mg, 0.45 mmol) and  $NiBr_2 \cdot DME$  (4.9 mg, 0.015 mmol) were added sequentially under  $N_2$ . Then DMAc (3 mL) was added. The reaction mixture was stirred at room temperature for 30 min.

Another oven-dried 10 mL flask was evacuated and back-filled with  $N_2$  for three times. After cooling at room temperature, NHC ( $N_4$ ) (177.4 mg, 0.45 mmol), 1,4-dioxane (3 mL) and alcohol **2** (58.0 mg, 0.42 mmol) were added. Then pyridine (34  $\mu$ L, 0.42 mmol) was added dropwise via a microsyringe. The reaction mixture was stirred for 20 min at room temperature. The 1,4-dioxane suspension was transferred to a 5 mL syringe under  $N_2$ . Then a syringe filter and a new needle were installed on the syringe, and the 1,4-dioxane solution was injected through the syringe filter into the mentioned above flask containing the Ir/Ni catalysts followed by adding carboxylic acid **1** (50.0 mg, 0.3 mmol),  $Boc_2O$  (85.2 mg, 0.39 mmol) and TEMPO (94.1 mg, 0.6 mmol). The resulting crude mixture was then allowed to stir at room temperature and irradiated by 450–455 nm LEDs at a distance of 5 cm for 24 h at rt. The reaction mixture was quenched by water (10 mL) and extracted by ethyl acetate (15 mL) for 3 times. The reaction mixture was then diluted with EtOAc and filtered through a short pad of silica using EtOAc. The filtrate was concentrated in *vacuo*. The crude mixture was monitored by  $^1H$  NMR (0% NMR yield) with mesitylene as an internal standard. However, the benzylic radical-trapping adduct **50** was observed by HRMS and the detailed information is illustrated as follows:

### Single Mass Analysis

Tolerance = 5.0 mDa / DBE: min = -1.5, max = 50.0

Element prediction: Off

Number of isotope peaks used for i-FIT = 3

Monoisotopic Mass, Even Electron Ions

329 formula(e) evaluated with 1 results within limits (up to 50 best isotopic matches for each mass)

Elements Used:

C: 18-18 H: 30-30 N: 0-100 O: 0-100 Na: 0-1

15

240127-1-39 23 (0.119)

1: TOF MS ES+  
3.73e+004

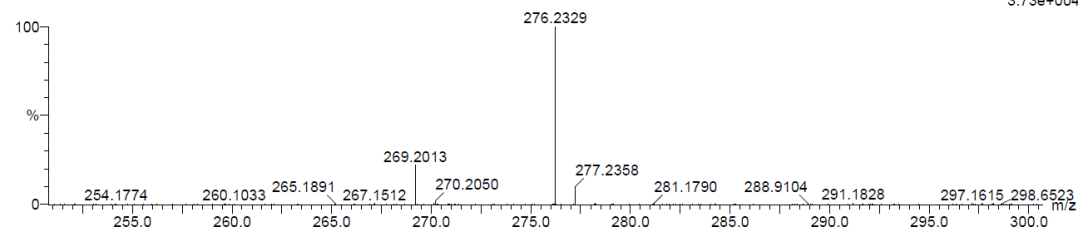

Minimum:

Maximum:

5.0

10.0

-1.5

50.0

| Mass     | Calc. Mass | mDa | PPM | DBE | i-FIT | Norm | Conf(%) | Formula     |
|----------|------------|-----|-----|-----|-------|------|---------|-------------|
| 276.2329 | 276.2327   | 0.2 | 0.7 | 4.5 | 63.0  | n/a  | n/a     | C18 H30 N O |

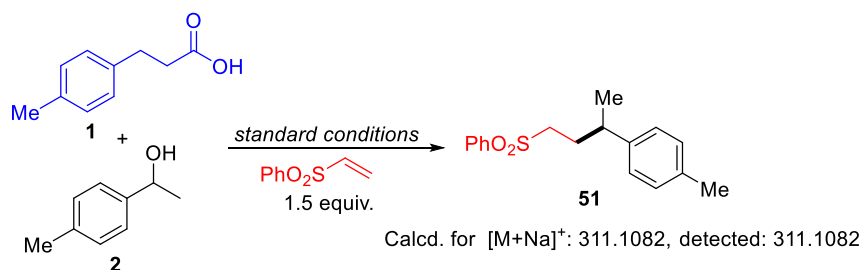

An oven-dried 25 mL flask was evacuated and back-filled with  $N_2$  for three times. After cooling at room temperature,  $Ir(ppy)_2(dtbbpy)PF_6$  (3.9 mg, 0.004 mmol),  $dtbbpy$  ( $L_1$ ) (8.2 mg, 0.03 mmol),  $K_2CO_3$  (72.2 mg, 0.52 mmol),  $Cs_2CO_3$  (193.3 mg, 0.60 mmol) and  $NiBr_2 \cdot DME$  (6.2 mg, 0.02 mmol) were added sequentially under  $N_2$ . Then DMAc (4 mL) was added. The reaction mixture was stirred at room temperature for 30 min.

Another oven-dried 10 mL flask was evacuated and back-filled with  $N_2$  for three times. After cooling at room temperature, NHC ( $N_4$ ) (237.0 mg, 0.60 mmol), 1,4-dioxane (4 mL) and alcohol **2** (76.5 mg, 0.56 mmol) were added. Then pyridine (0.56 mmol) was added dropwise via a microsyringe. The reaction mixture was stirred for 20 min at room temperature. The 1,4-dioxane suspension was transferred to a 5 mL syringe under  $N_2$ . Then a syringe filter and a new needle were installed on the syringe, and the 1,4-dioxane solution was injected through the syringe filter into the mentioned above flask containing the Ir/Ni catalysts followed by adding carboxylic acid **1** (0.4 mmol),  $Boc_2O$  (0.52 mmol) and phenylvinyl sulfone (101.1 mg, 0.60 mmol). The resulting crude mixture was then

allowed to stir at room temperature and irradiated by 450–455 nm LEDS at a distance of 5 cm for 24 h at rt with a fan. The reaction mixture was quenched by water (10 mL) and extracted by ethyl acetate (15 mL) for 3 times. The combined organic layers were dried over anhydrous Na<sub>2</sub>SO<sub>4</sub>. After filtration, the filtrate was concentrated in *vacuo* and monitored by HRMS, which suggested the generation of adduct **51**. The detailed information was illustrated as follows:

#### Single Mass Analysis

Tolerance = 5.0 mDa / DBE: min = -1.5, max = 50.0

Element prediction: Off

Number of isotope peaks used for i-FIT = 3

Monoisotopic Mass, Even Electron Ions

809 formula(e) evaluated with 1 results within limits (up to 50 best isotopic matches for each mass)

Elements Used:

C: 17-17 H: 20-20 N: 0-100 O: 0-100 Na: 0-1 S: 1-3

15

240127-1-40 15 (0.090)

1: TOF MS ES+  
1.81e+004

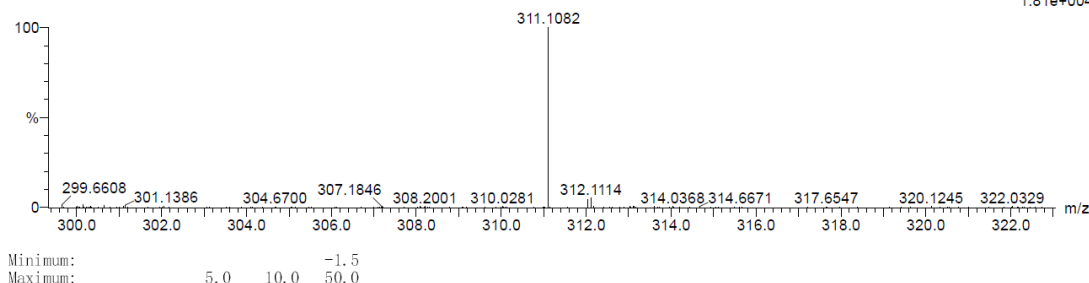

Minimum:  
Maximum:

5.0 10.0 -1.5 50.0

| Mass     | Calc. Mass | mDa | PPM | DBE | i-FIT | Norm | Conf(%) | Formula         |
|----------|------------|-----|-----|-----|-------|------|---------|-----------------|
| 311.1082 | 311.1082   | 0.0 | 0.0 | 7.5 | 118.0 | n/a  | n/a     | C17 H20 O2 Na S |

#### (b) Radical-Clock experiment

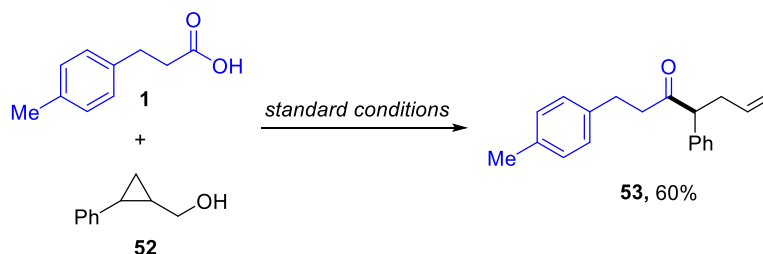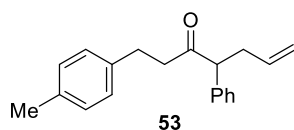

4-phenyl-1-(*p*-tolyl)hept-6-en-3-one (**53**). Prepared according to the general procedure employing Ir(ppy)<sub>2</sub>(dtbbpy)PF<sub>6</sub> (3.7 mg, 0.004 mmol), K<sub>2</sub>CO<sub>3</sub> (71.0 mg, 0.52 mmol), Cs<sub>2</sub>CO<sub>3</sub> (196.0 mg, 0.60 mmol), K<sub>2</sub>HPO<sub>4</sub> (210.0 mg, 1.2 mmol), MeCN (19 mL) and H<sub>2</sub>O (1 mL). After 24 h, the reaction mixture

was cooled to rt and filtered through a short pad of silica using EA. The filtrate was concentrated in *vacuo* before it was purified by flash chromatography (PE/EA = 15/1) on silica gel to afford **53** (66.7 mg, 0.24 mmol, 60% yield) as a yellow oil. <sup>1</sup>H NMR (400 MHz, Chloroform-*d*) δ 7.32 – 7.21 (m, 3H), 7.16 (d, *J* = 7.2 Hz, 2H), 7.02 (d, *J* = 7.6 Hz, 2H), 6.94 (d, *J* = 7.6 Hz, 2H), 5.71 – 5.55 (m, 1H), 4.98 (d, *J* = 16.8 Hz, 1H), 4.93 (d, *J* = 10.0 Hz, 1H), 3.65 (t, *J* = 7.6 Hz, 1H), 2.88 – 2.76 (m,

2H), 2.75 – 2.60 (m, 3H), 2.48 – 2.37 (m, 1H), 2.28 (s, 3H);  $^{13}\text{C}$  NMR (101 MHz, Chloroform- $d$ )  $\delta$  208.8, 138.2, 137.8, 135.7, 135.4, 129.0, 128.9, 128.3, 128.1, 127.2, 116.6, 58.9, 43.5, 36.2, 29.3, 20.9; HRMS (ESI-TOF) Calcd for  $\text{C}_{20}\text{H}_{22}\text{ONa}$   $[\text{M}+\text{Na}]^+$ : 301.1563; Found 301.1565.

#### Single Mass Analysis

Tolerance = 5.0 mDa / DBE: min = -1.5, max = 50.0

Element prediction: Off

Number of isotope peaks used for i-FIT = 3

Monoisotopic Mass, Even Electron Ions

393 formula(e) evaluated with 1 results within limits (up to 50 best isotopic matches for each mass)

Elements Used:

C: 20-20 H: 22-22 N: 0-100 O: 0-100 Na: 0-1

15

240127-1-41 22 (0.115)

1: TOF MS ES+  
5.32e+004

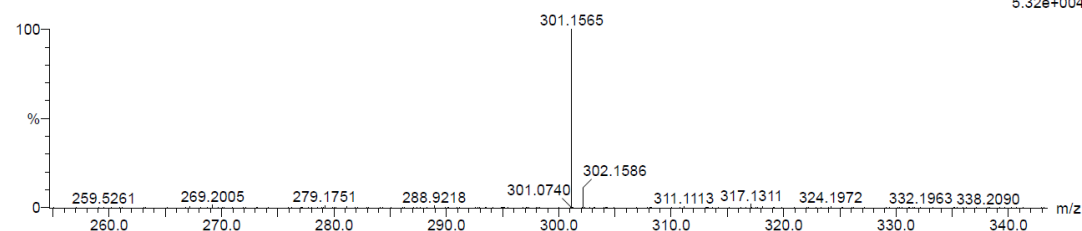

Minimum:

Maximum:

5.0 10.0 -1.5 50.0

| Mass     | Calc. Mass | mDa  | PPM  | DBE | i-FIT | Norm | Conf (%) | Formula                                 |
|----------|------------|------|------|-----|-------|------|----------|-----------------------------------------|
| 301.1565 | 301.1568   | -0.3 | -1.0 | 9.5 | 93.1  | n/a  | n/a      | $\text{C}_{20}\text{H}_{22}\text{O Na}$ |

#### (c) The light-on-off experiment

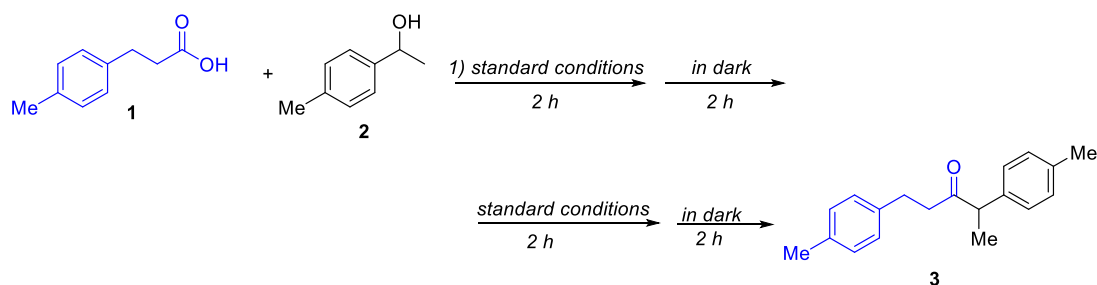

Four oven-dried 25 mL flasks were evacuated and back-filled with  $\text{N}_2$  for three times. After cooling at room temperature,  $\text{Ir}(\text{ppy})_2(\text{dtbbpy})\text{PF}_6$  (0.004 mmol), dtbbpy ( $\text{L}_1$ ) (0.03 mmol),  $\text{K}_2\text{CO}_3$  (0.52 mmol),  $\text{Cs}_2\text{CO}_3$  (0.60 mmol) and  $\text{NiBr}_2\cdot\text{DME}$  (0.02 mmol) were added sequentially under  $\text{N}_2$ . Then DMAc (4 mL) was added. The reaction mixture was stirred at room temperature for 30 min.

Another oven-dried 25 mL flask was evacuated and back-filled with  $\text{N}_2$  for three times. After cooling at room temperature, NHC ( $\text{N}_4$ ) (2.40 mmol), 1,4-dioxane (16 mL) and alcohol **2** (2.24 mmol) were added. Then pyridine (2.24 mmol) was added dropwise via a microsyringe. The reaction mixture was stirred for 20 min at room temperature. The 1,4-dioxane suspension was transferred to a 20 mL syringe under  $\text{N}_2$ . Then a syringe filter and a new needle were installed on the syringe, and the 1,4-dioxane solution was injected through the syringe filter into the mentioned

above four flasks containing the Ir/Ni catalysts followed by adding carboxylic acid **1** (0.4 mmol) and Boc<sub>2</sub>O (0.52 mmol) equally. The resulting crude mixtures were then allowed to stir at room temperature and irradiated by 450-455 nm LEDs at a distance of 5 cm for 2 h, 2 h with LEDs + 2 hours without light, 2 h with LEDs + 2 hours without light + 2 h with LEDs and 2 h with LEDs + 2 hours without light + 2 h with LEDs + 2 h without light, respectively. The reaction yields were determined by <sup>1</sup>H NMR analysis with mesitylene as an internal standard.

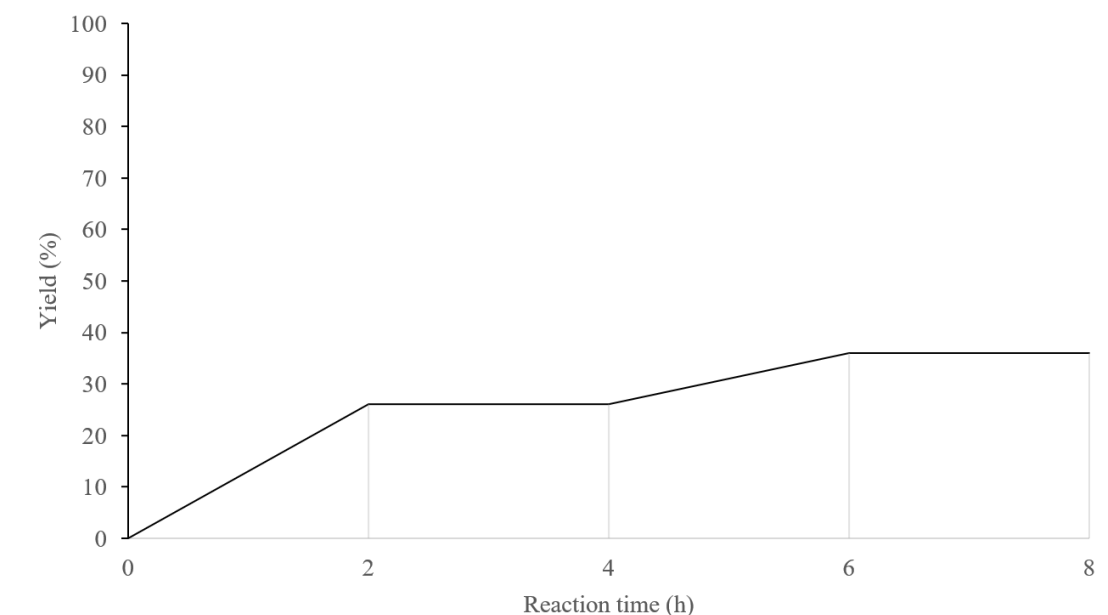

**The light-on-off experiment**

**(d) Carboxylic acids activation**

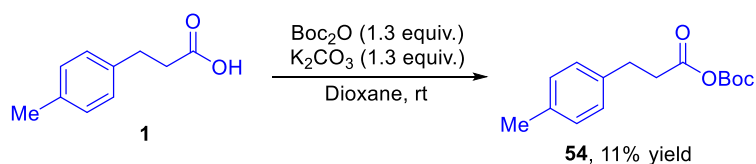

An oven-dried 25 mL flask was evacuated and back-filled with N<sub>2</sub> for three times. After cooling at room temperature, carboxylic acid **1** (49.5 mg, 0.3 mmol), K<sub>2</sub>CO<sub>3</sub> (54.0 mg, 0.39 mmol) and 1,4-dioxane (3 mL) were added sequentially under N<sub>2</sub>. The reaction mixture was stirred at room temperature for 3h. The reaction mixture was then diluted with EtOAc and filtered through a short pad of silica using EtOAc. The filtrate was concentrated in *vacuo*. The crude mixture was monitored by <sup>1</sup>H NMR (11% NMR yield) with mesitylene as an internal standard.

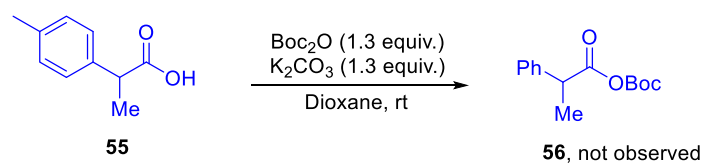

An oven-dried 25 mL flask was evacuated and back-filled with N<sub>2</sub> for three times. After cooling at room temperature, carboxylic acid **55** (49.6 mg, 0.3 mmol), K<sub>2</sub>CO<sub>3</sub> (53.7 mg, 0.39 mmol) and 1,4-dioxane (3 mL) were added sequentially under N<sub>2</sub>. The reaction mixture was stirred at room temperature for 3h. The reaction mixture was then diluted with EtOAc and filtered through a short pad of silica using EtOAc. The filtrate was concentrated in *vacuo*. The crude mixture was monitored by <sup>1</sup>H NMR (0% NMR yield) with mesitylene as an internal standard.

**(e) Demonstration of the presence of Ni(0) species**

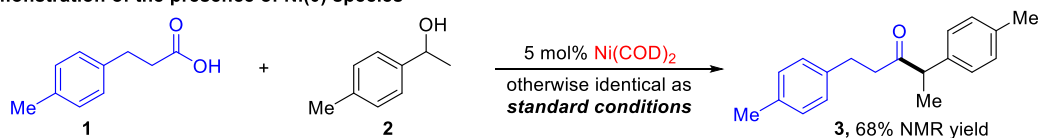

An oven-dried 25 mL flask was evacuated and back-filled with N<sub>2</sub> for three times. After cooling at room temperature, Ir(ppy)<sub>2</sub>(dtbbpy)PF<sub>6</sub> (0.003 mmol), dtbbpy (L<sub>1</sub>) (0.0225 mmol), K<sub>2</sub>CO<sub>3</sub> (0.39 mmol), Cs<sub>2</sub>CO<sub>3</sub> (0.45 mmol) and Ni(COD)<sub>2</sub> (6.5 mg, 0.015 mmol) were added sequentially under N<sub>2</sub> atmosphere. Then DMAc (3 mL) was added. The reaction mixture was stirred at room temperature for 30 min.

Another oven-dried 10 mL flask was evacuated and back-filled with N<sub>2</sub> for three times. After cooling at room temperature, NHC (N<sub>4</sub>) (0.45 mmol), 1,4-dioxane (3 mL) and alcohol **2** (0.42 mmol) were added. Then pyridine (0.42 mmol) was added dropwise via a microsyringe. The reaction mixture was stirred for 20 min at room temperature. The 1,4-dioxane suspension was transferred to a 5 mL syringe under N<sub>2</sub>. Then a syringe filter and a new needle were installed on the syringe, and the 1,4-dioxane solution was injected through the syringe filter into the mentioned above flask containing the Ir/Ni catalysts followed by adding carboxylic acid **1** (0.3 mmol) and Boc<sub>2</sub>O (0.39 mmol). The resulting crude mixture was then allowed to stir at room temperature and irradiated by 450–455 nm LEDs at a distance of 5 cm for 24 h at room temperature. The reaction mixture was quenched by water (10 mL) and extracted by ethyl acetate (15 mL) for 3 times. The combined organic layers were dried over anhydrous Na<sub>2</sub>SO<sub>4</sub>. After filtration, the filtrate was concentrated in *vacuo* and monitored through <sup>1</sup>H NMR analysis with mesitylene as an internal standard (68% NMR yield).

## VI. References

- 
- <sup>1</sup> P.-F. Yang, W. Shu. *Org. Lett.* **2020**, 22, 6203–6208.
- <sup>2</sup> A. H. Cherney, N. T. Kadunce, S. E. Reisman. *J. Am. Chem. Soc.* **2013**, 135, 7442–7445.
- <sup>3</sup> A. Whyte, T. P. Yoon. *Angew. Chem. Int. Ed.* **2022**, 61, e202213739.
- <sup>4</sup> B. Roh, A. O. Farah, B. Kim, T. Feoktistova, F. Moeller, K. D. Kim, P. H.-Y. Cheong, H. G. Lee. *J. Am. Chem. Soc.* **2023**, 145, 7075–7083.
- <sup>5</sup> T. Yuan, X. Ye, P. Zhao, S. Teng, Y. Yi, J. Wang, C. Shan, L. Wojtas, J. Jean, H. Chen, X. Shi, *Chem.* **2020**, 6, 1420–1431.

## VII. NMR Spectra

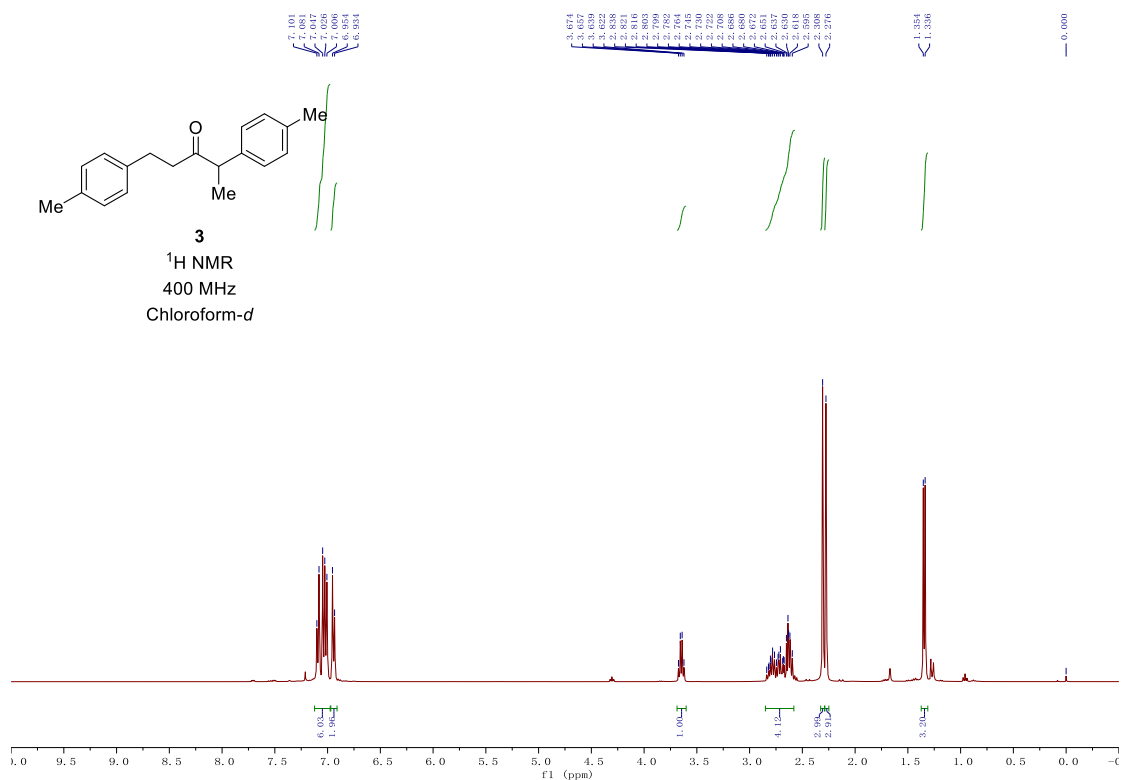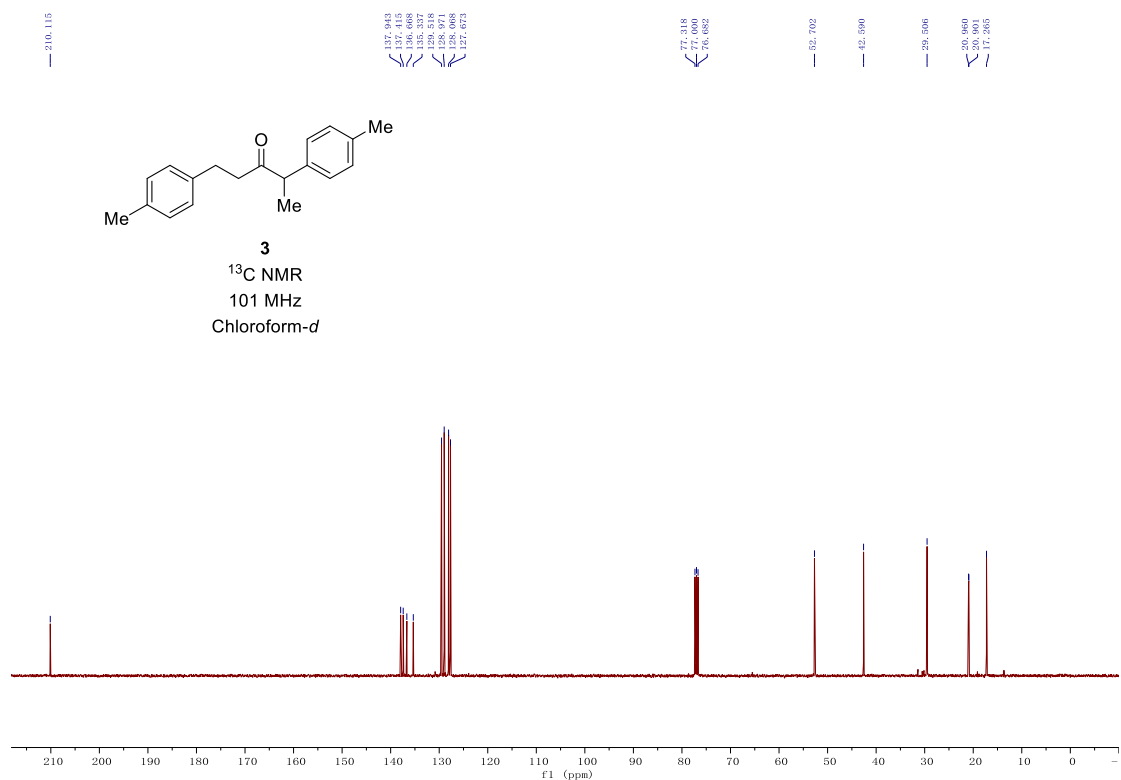

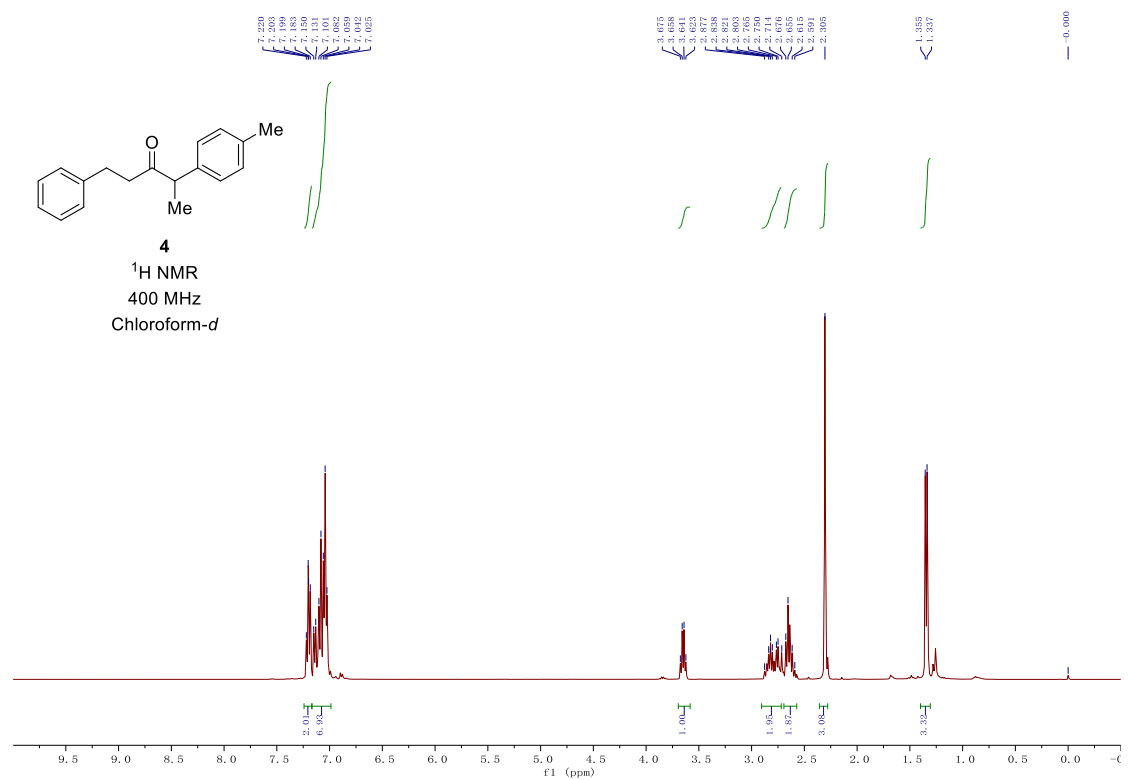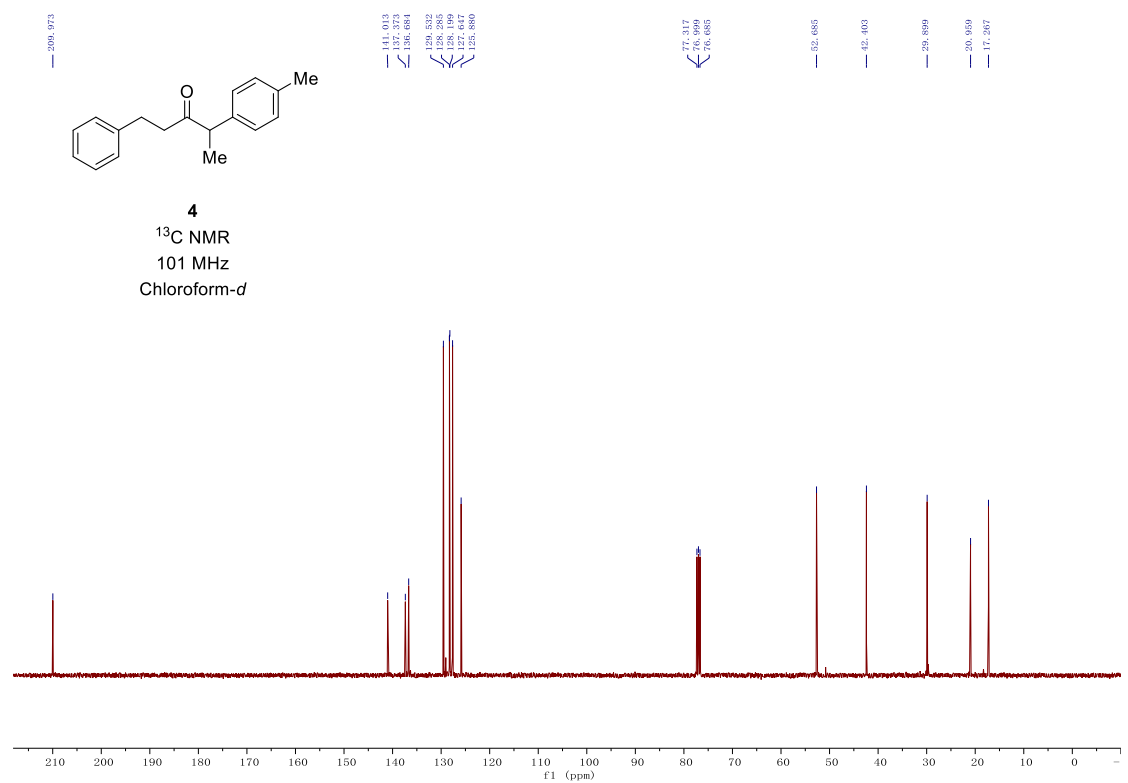





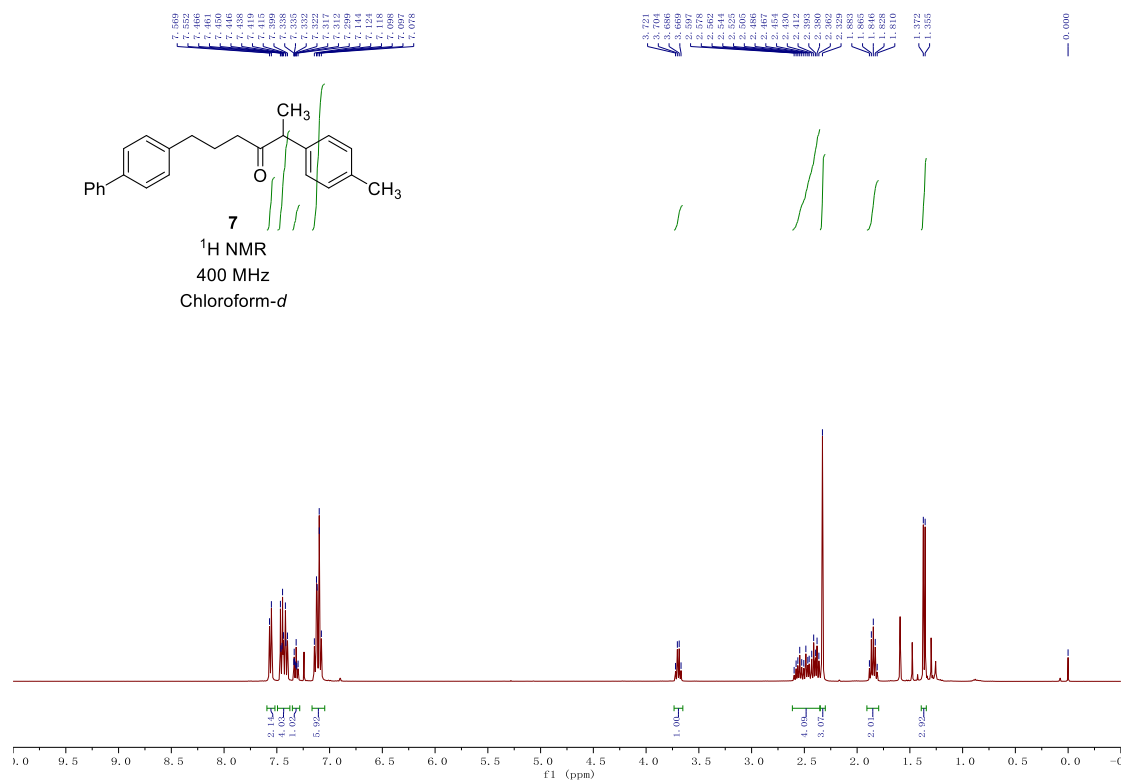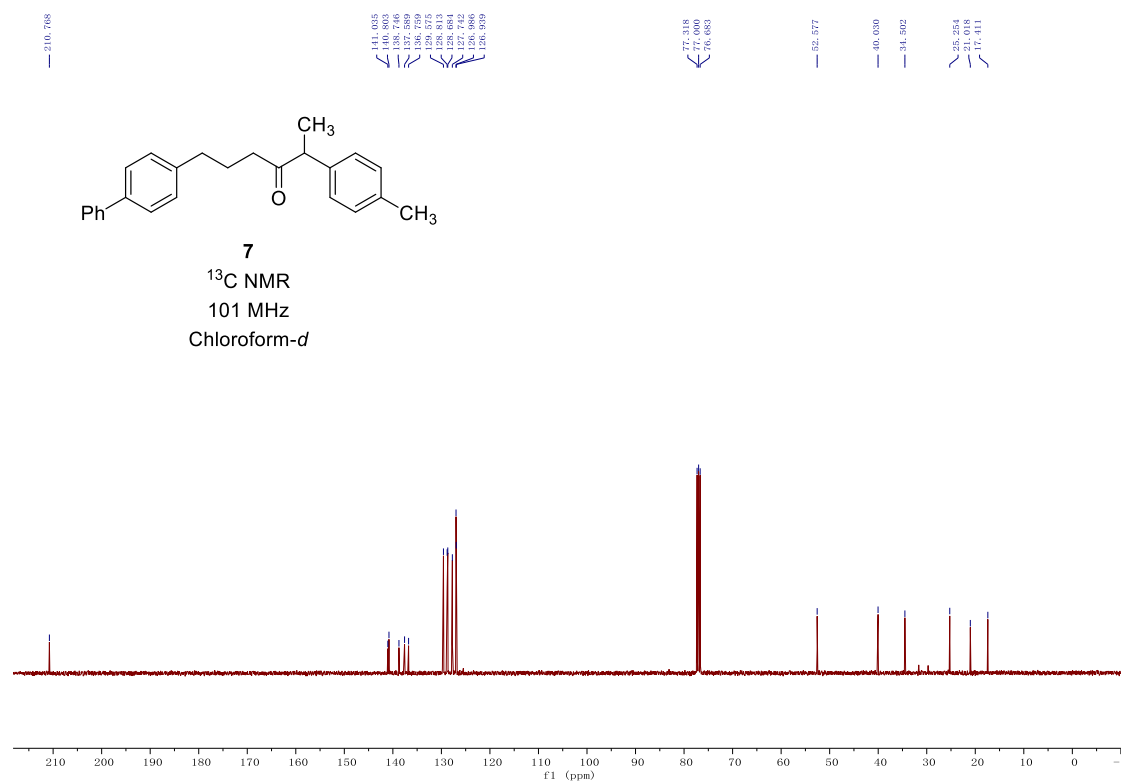

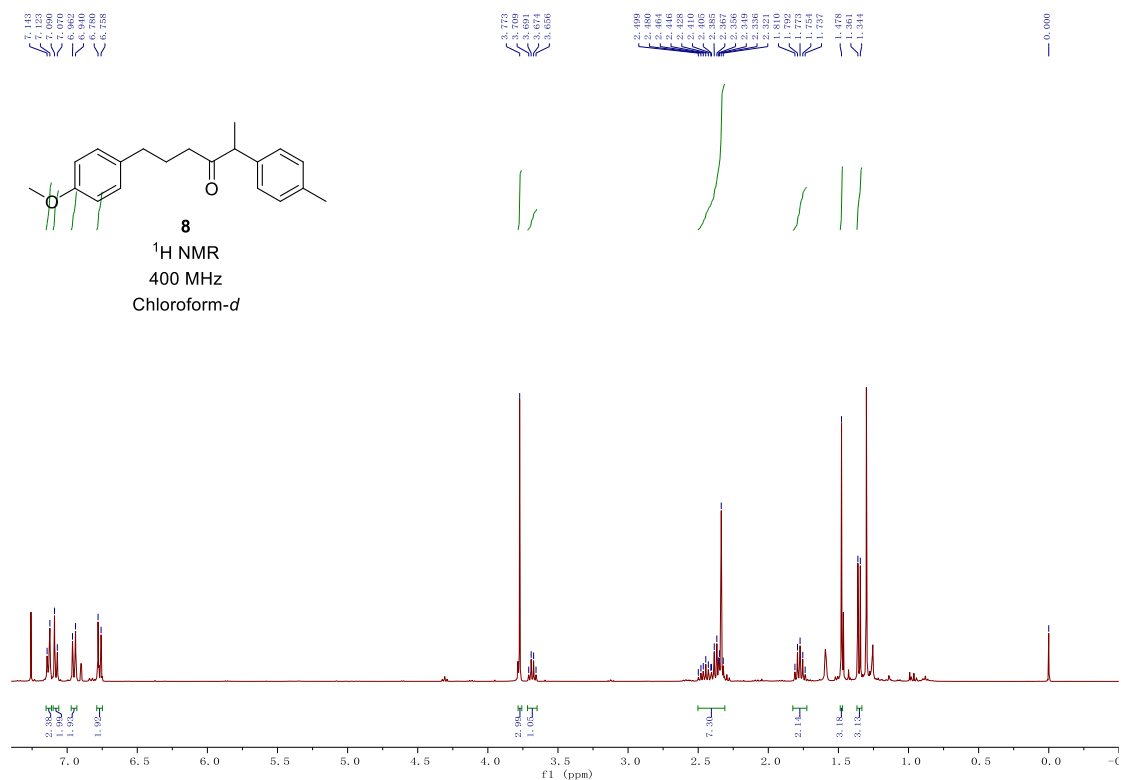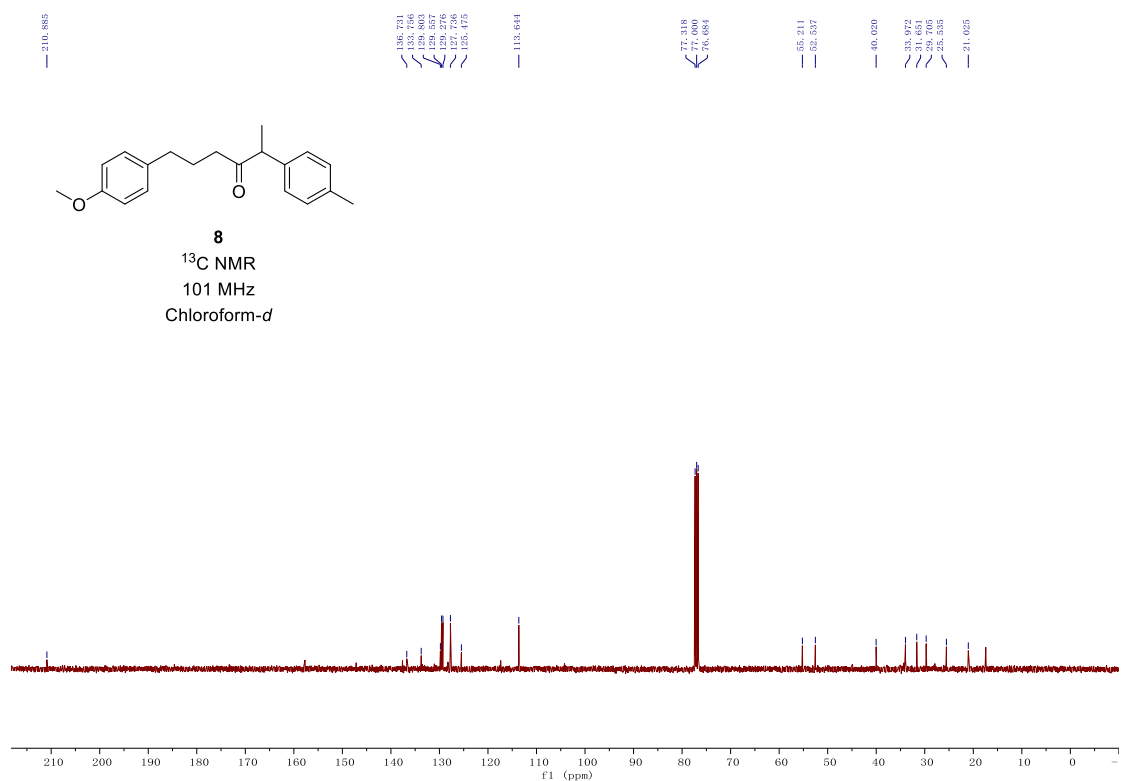

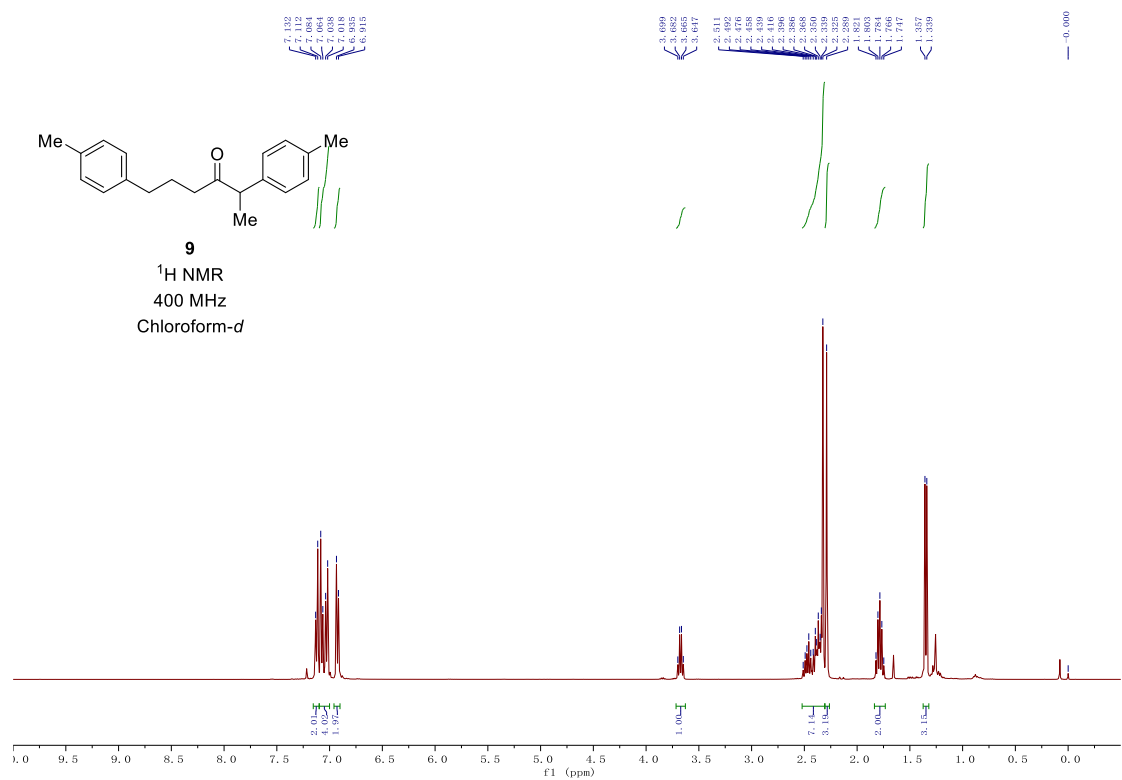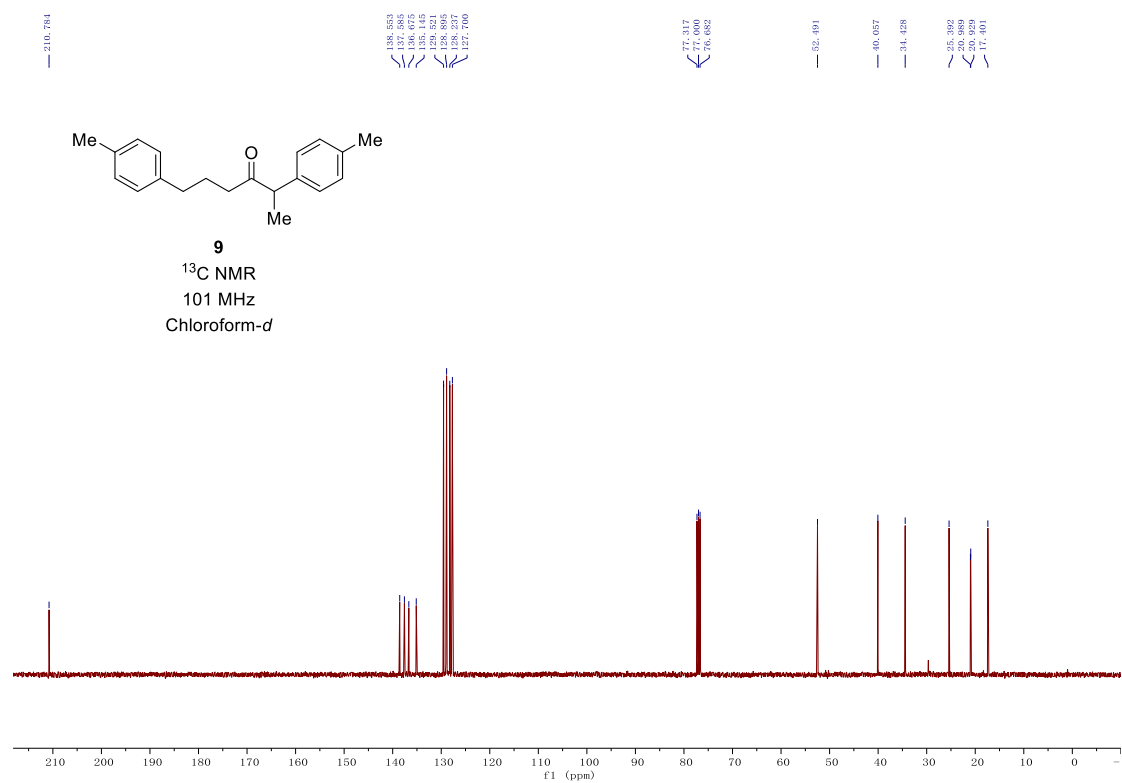

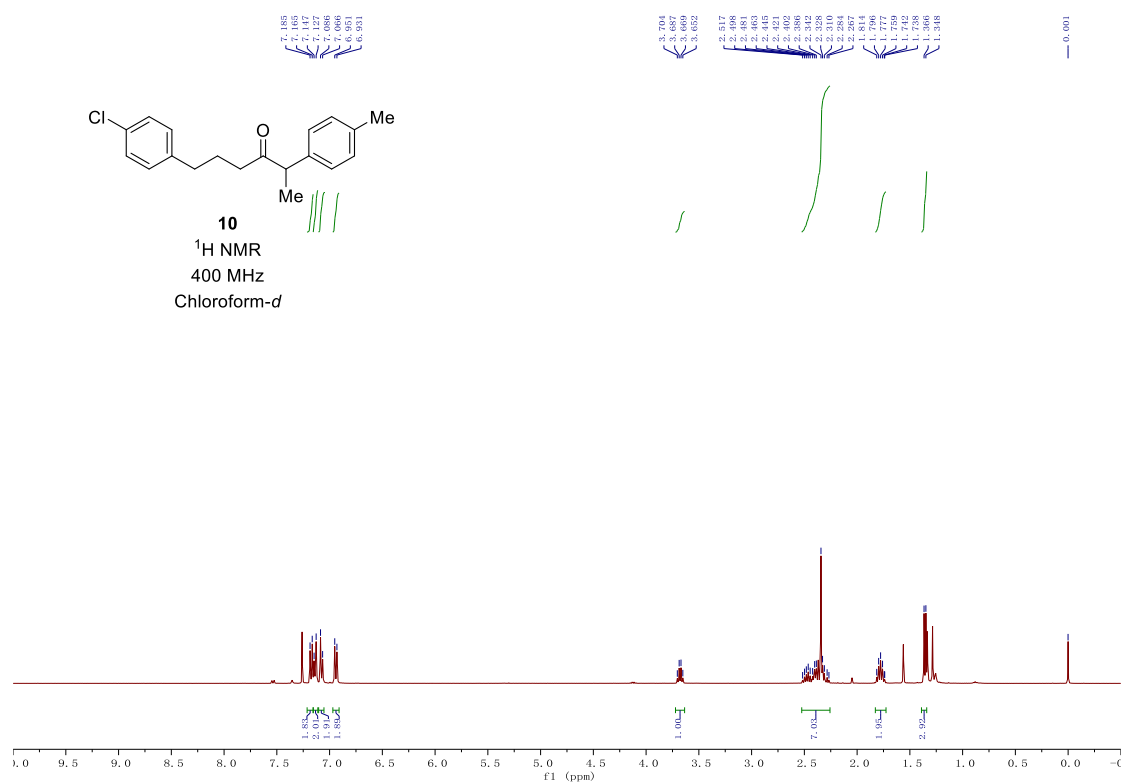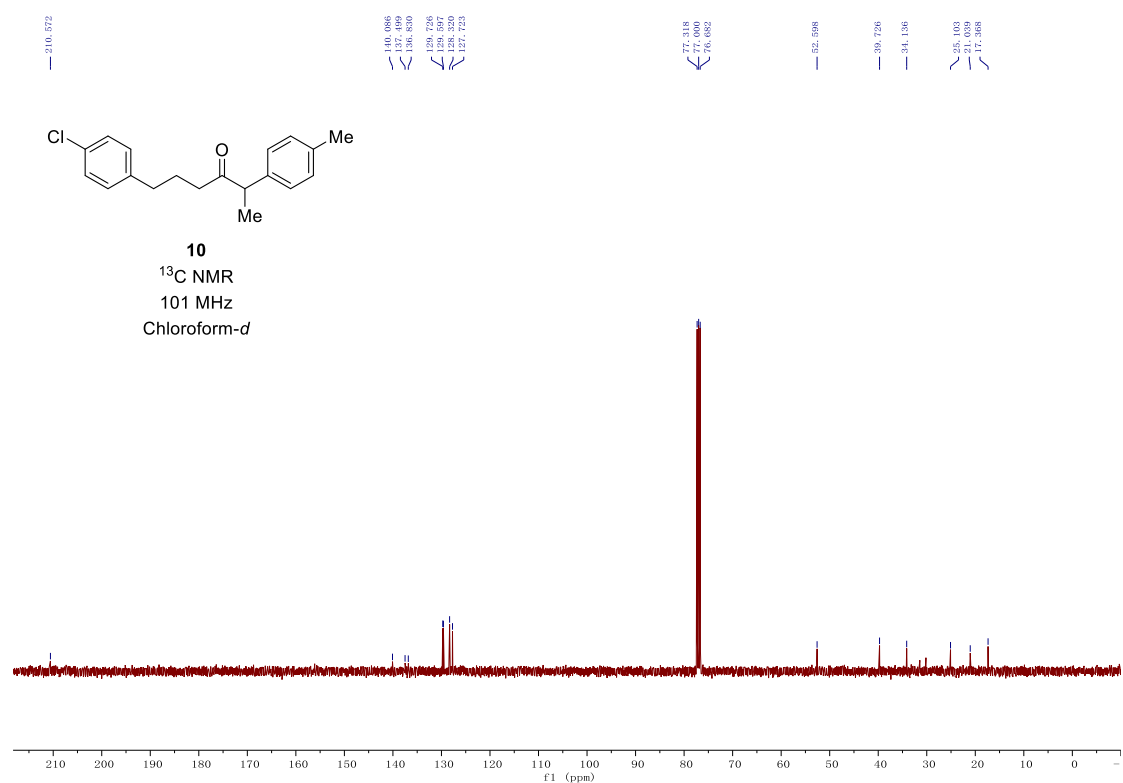

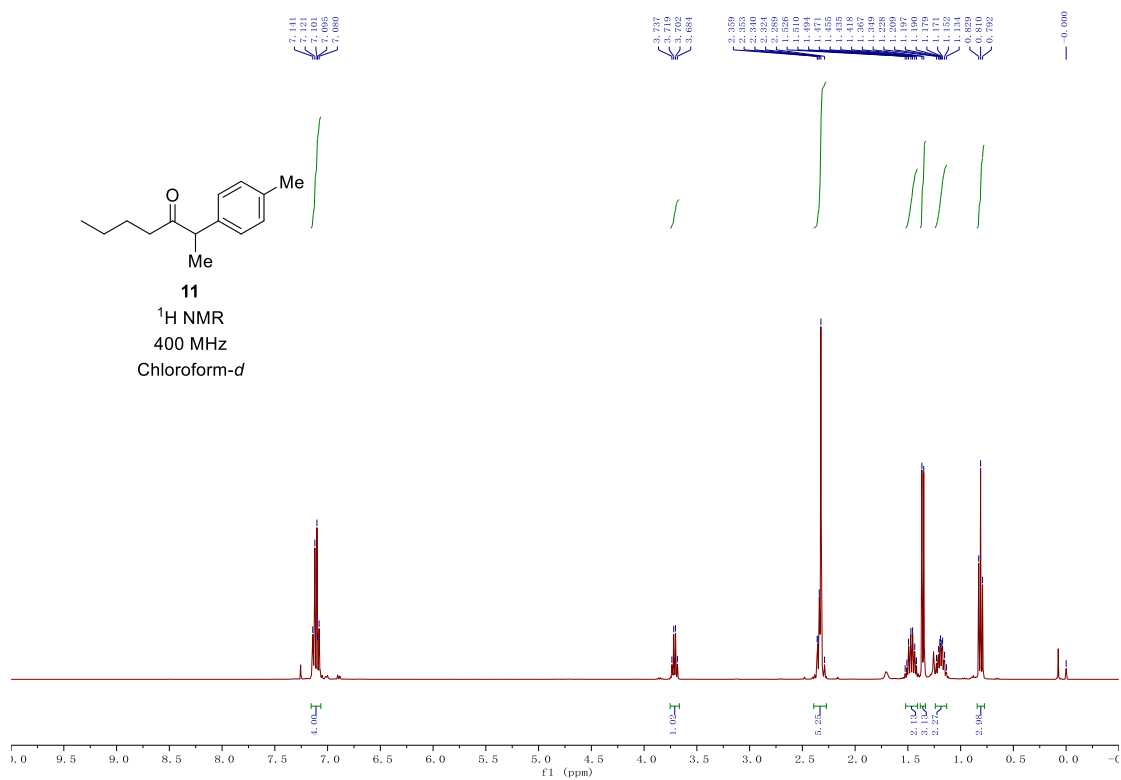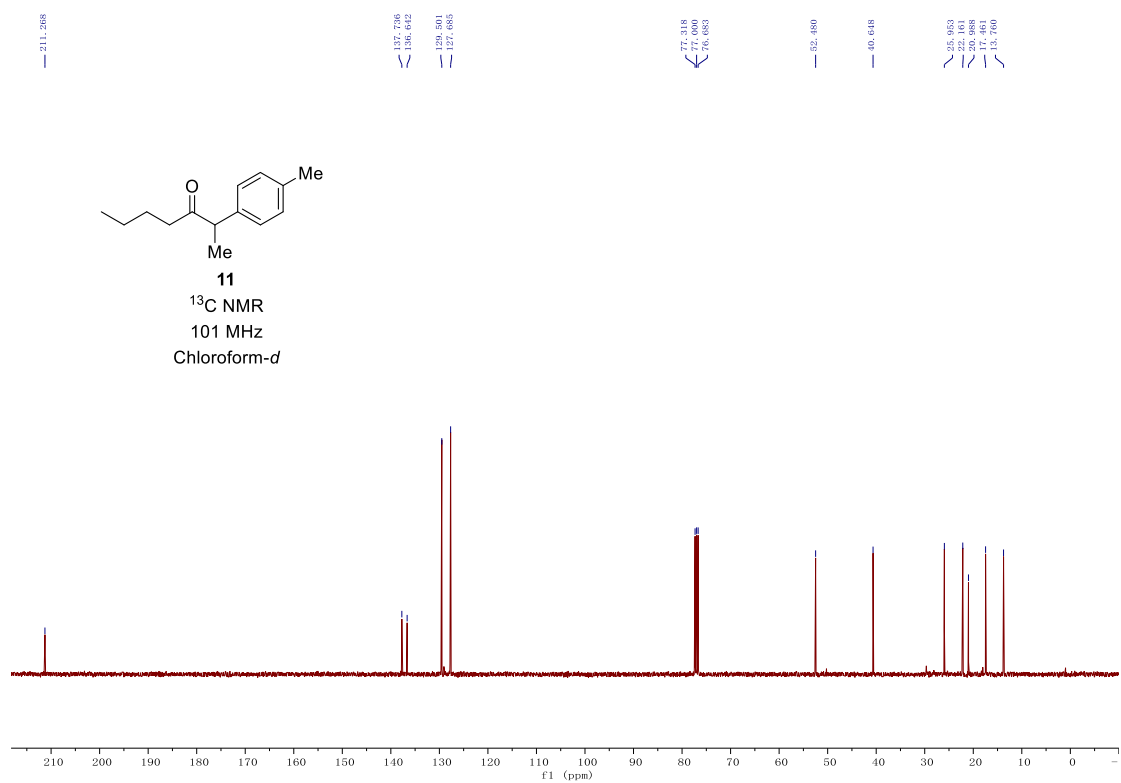

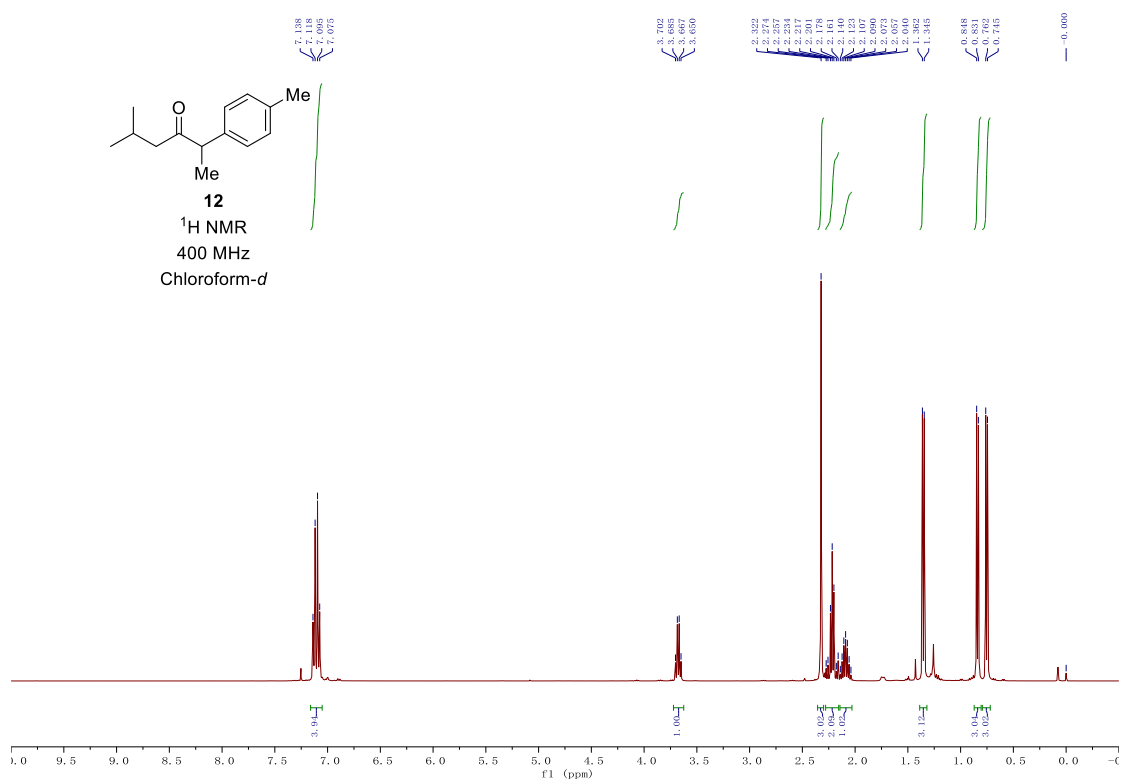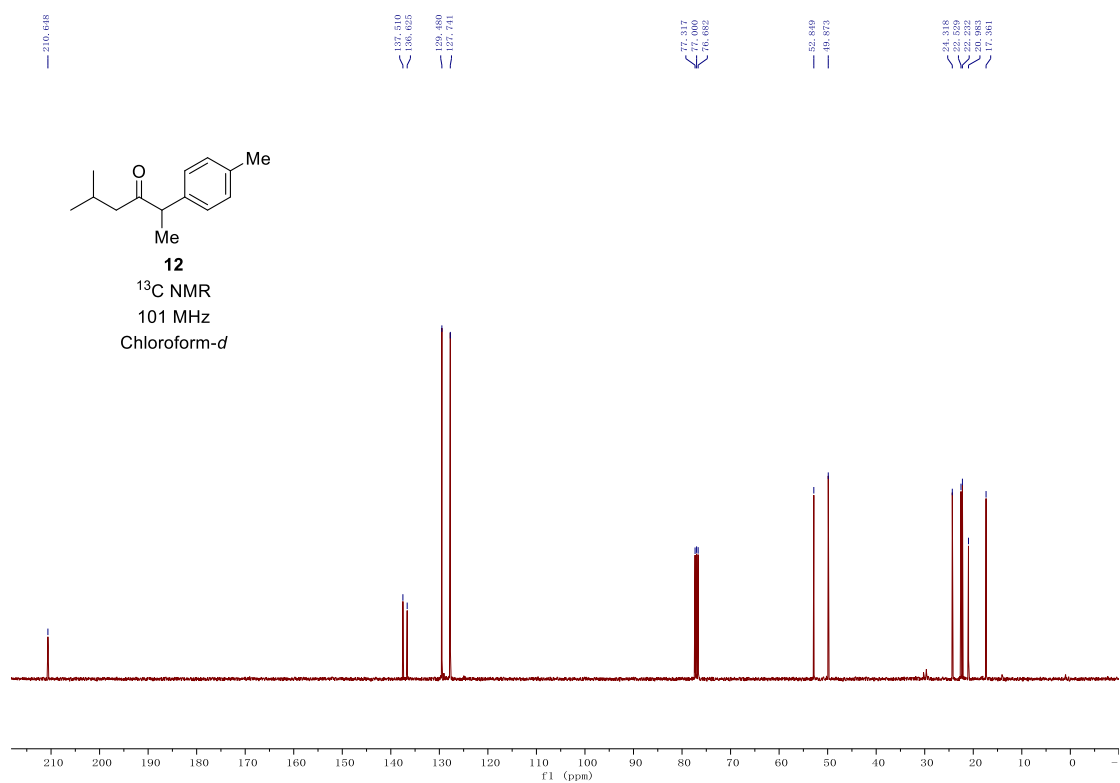

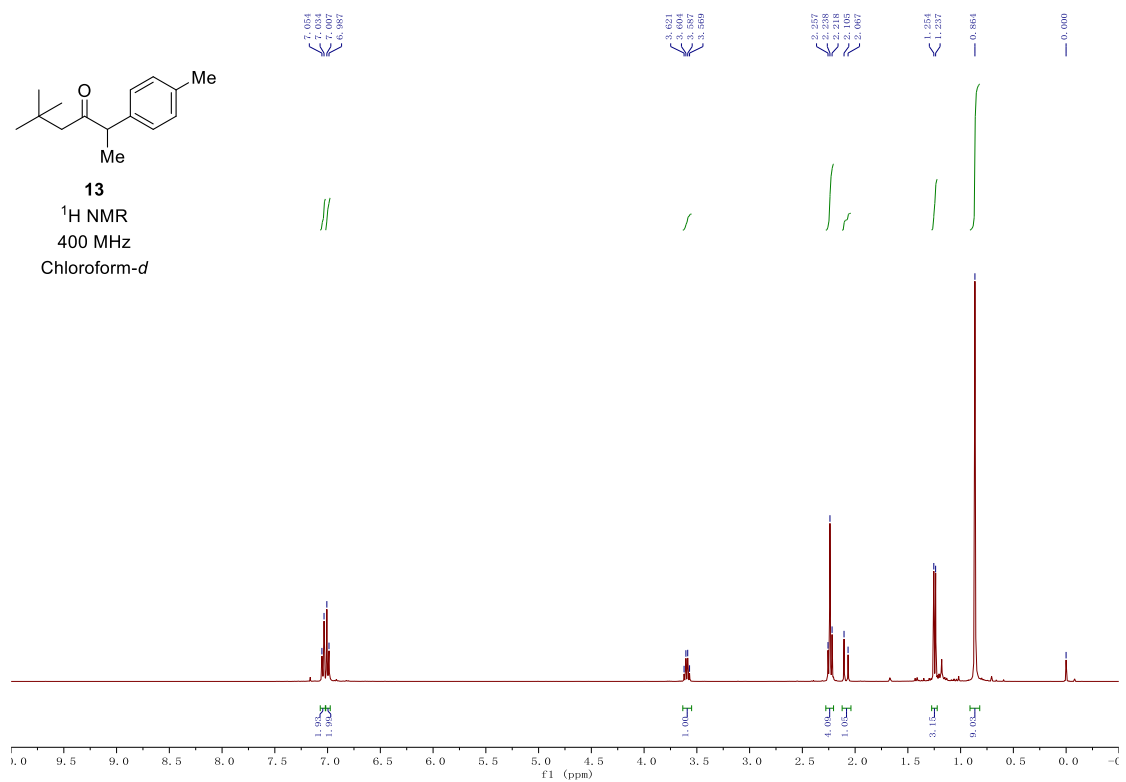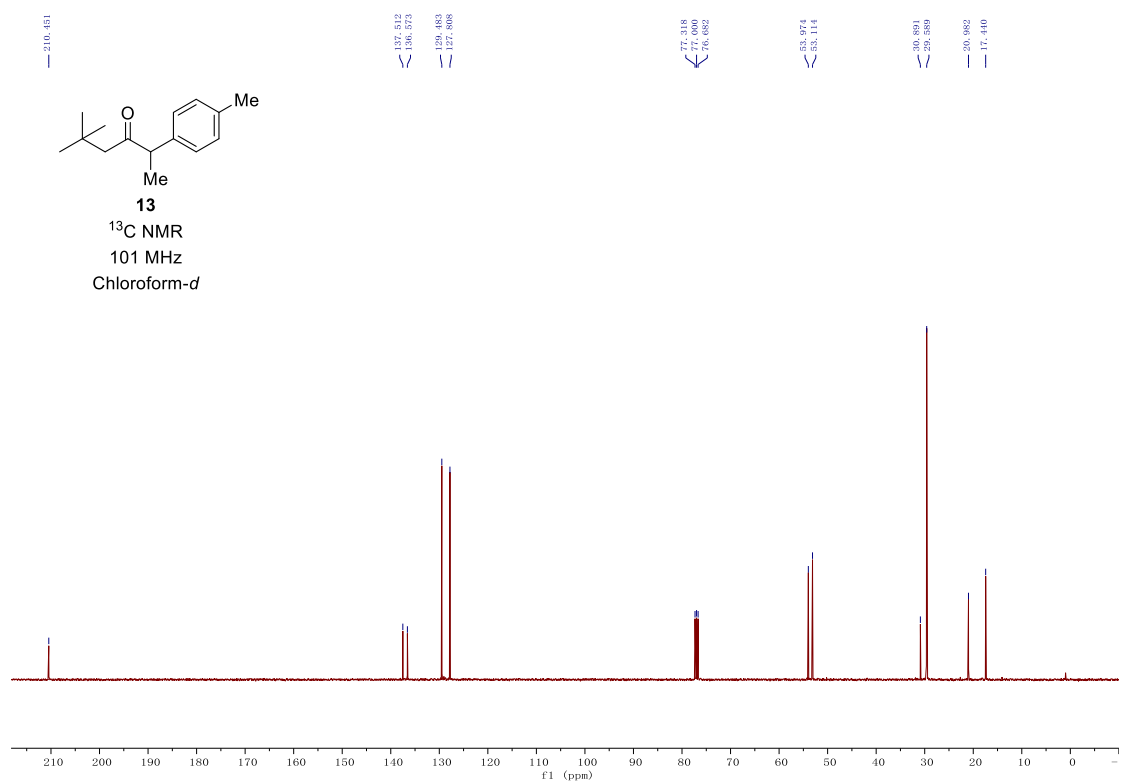

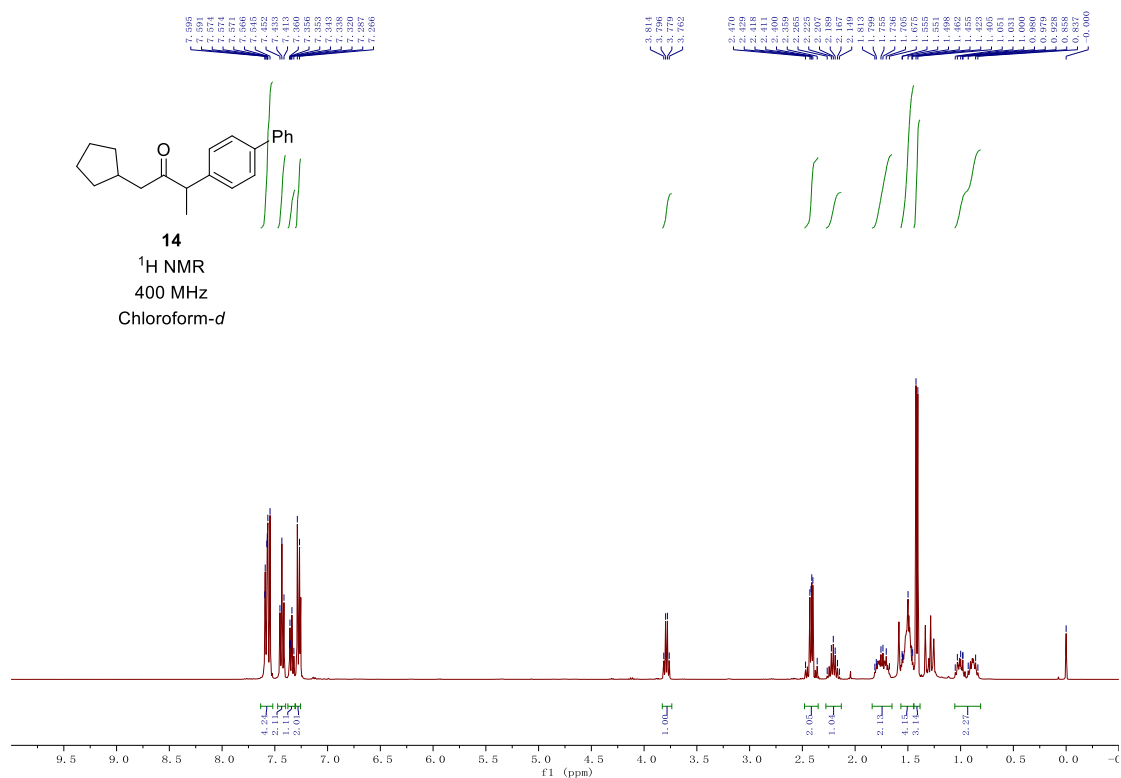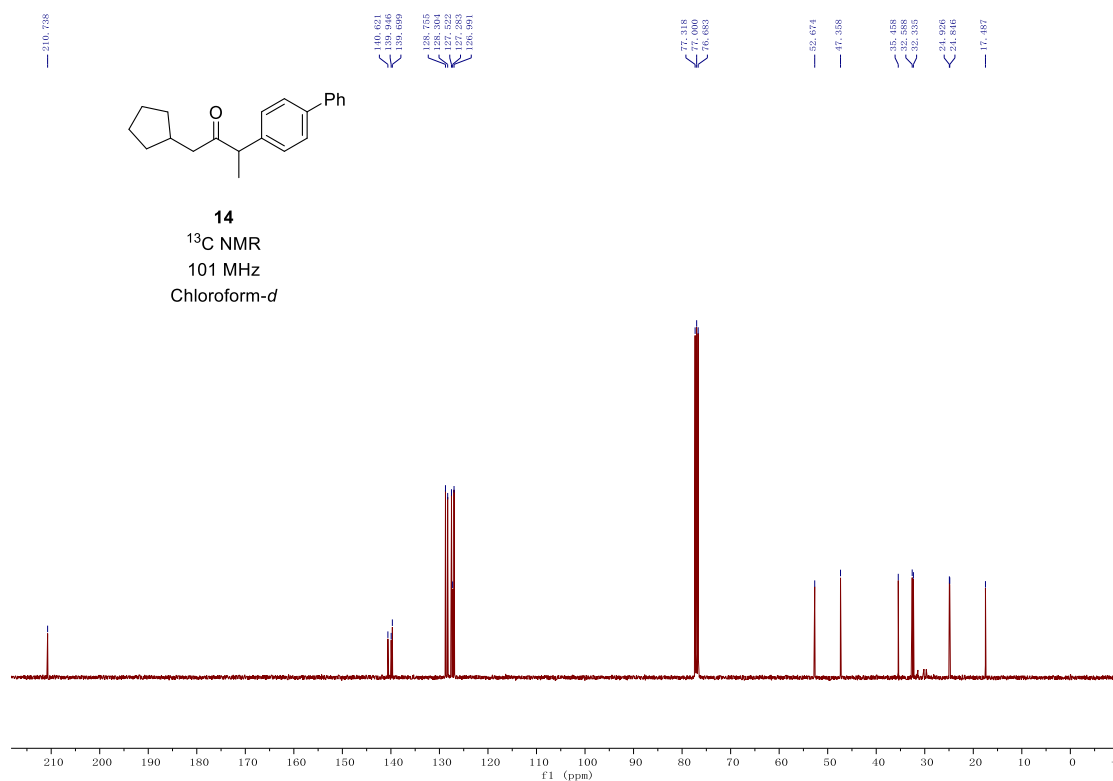

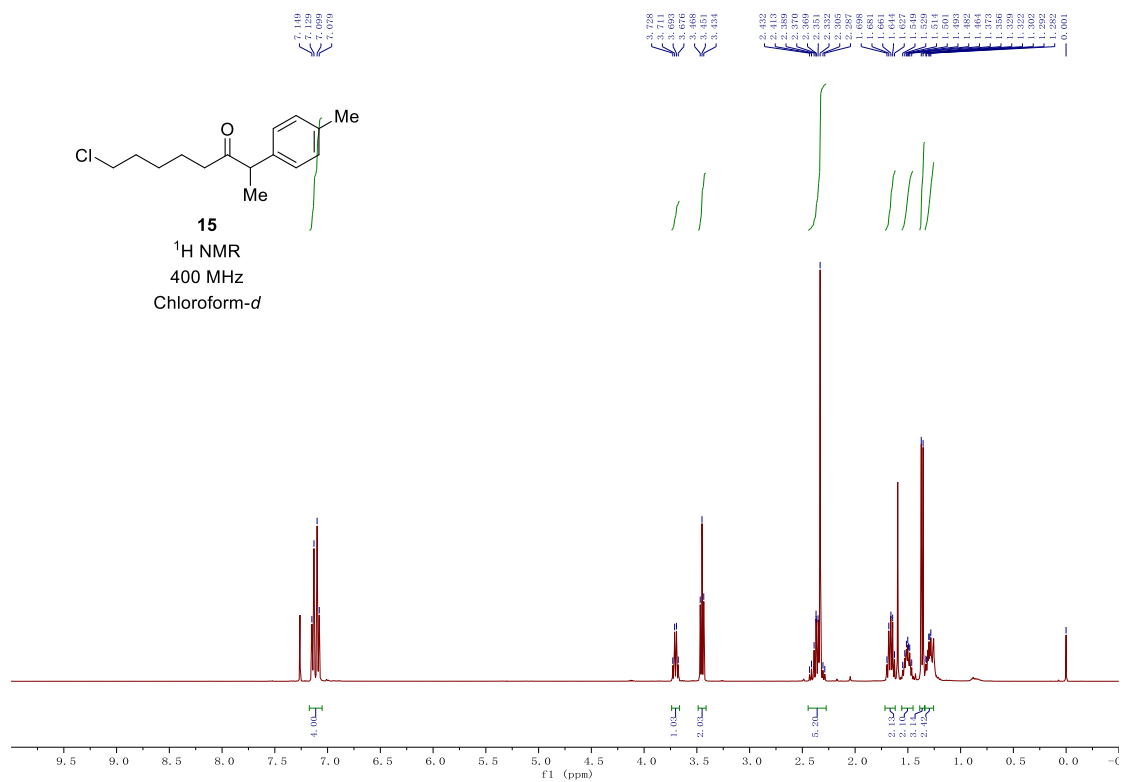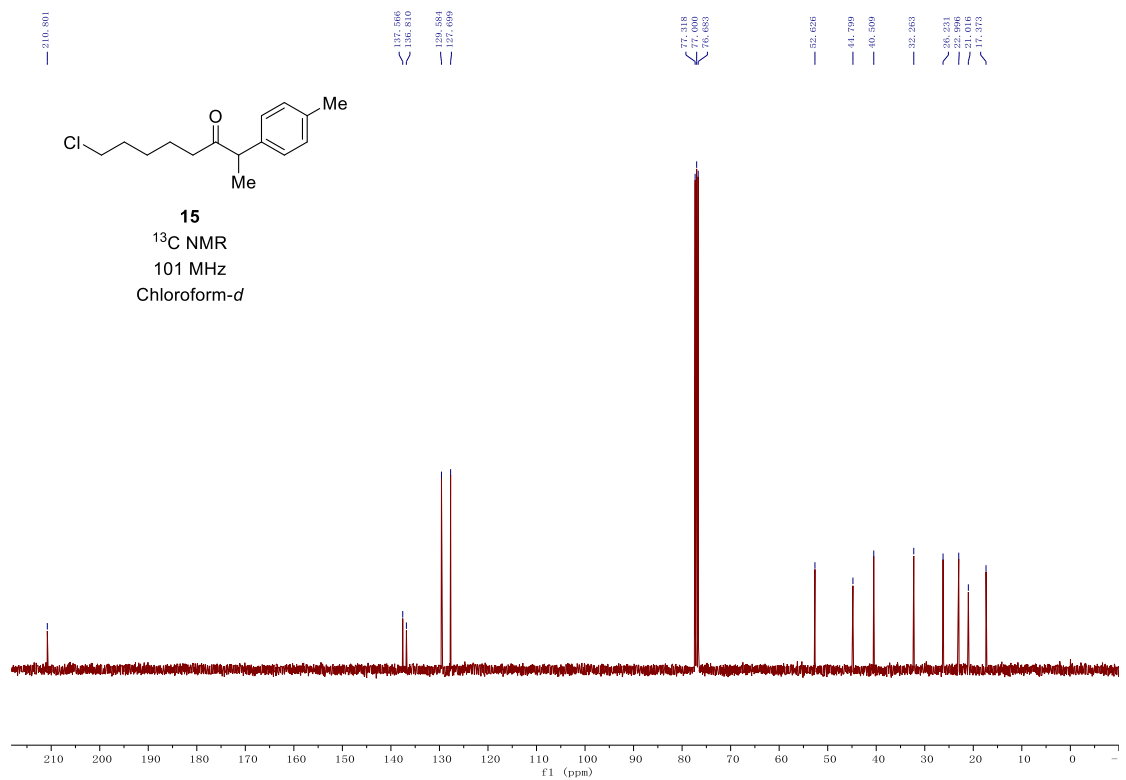

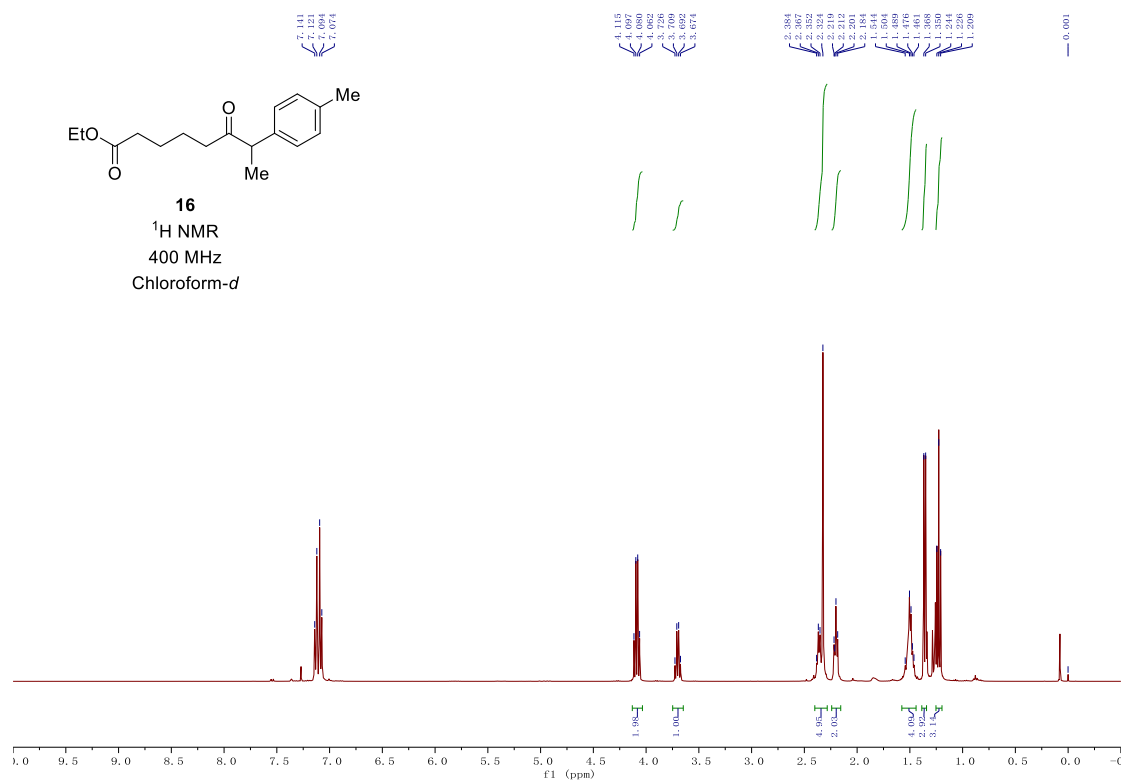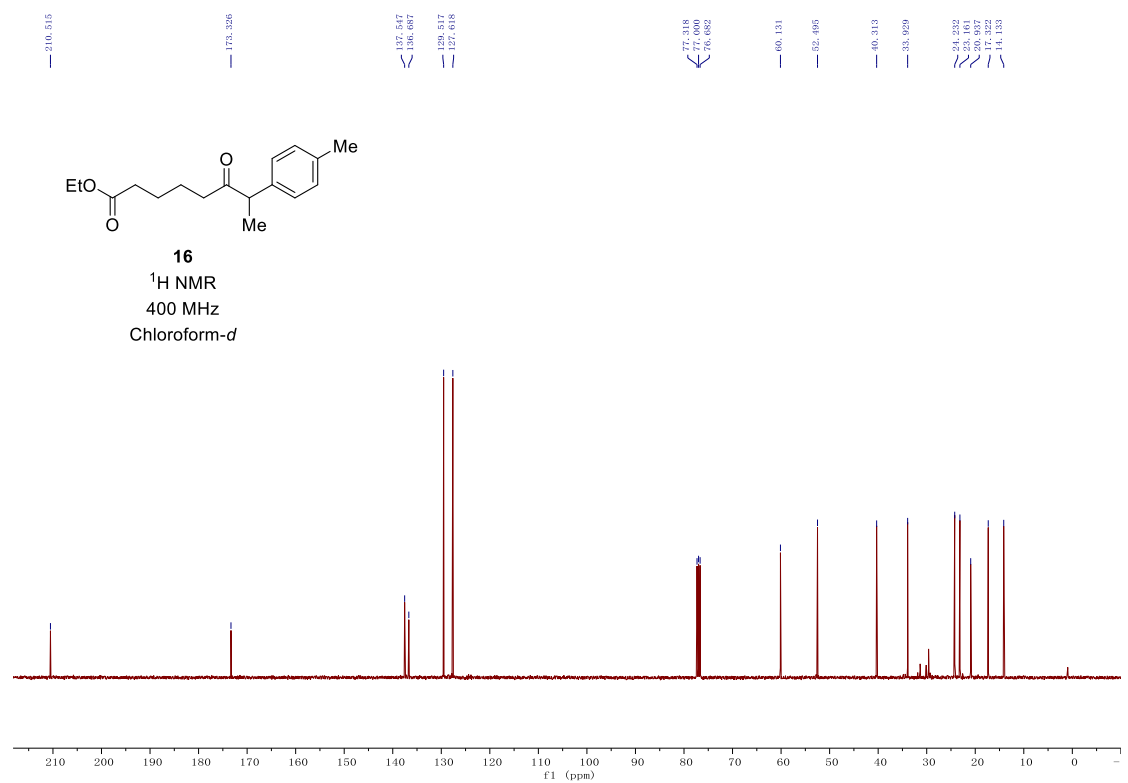



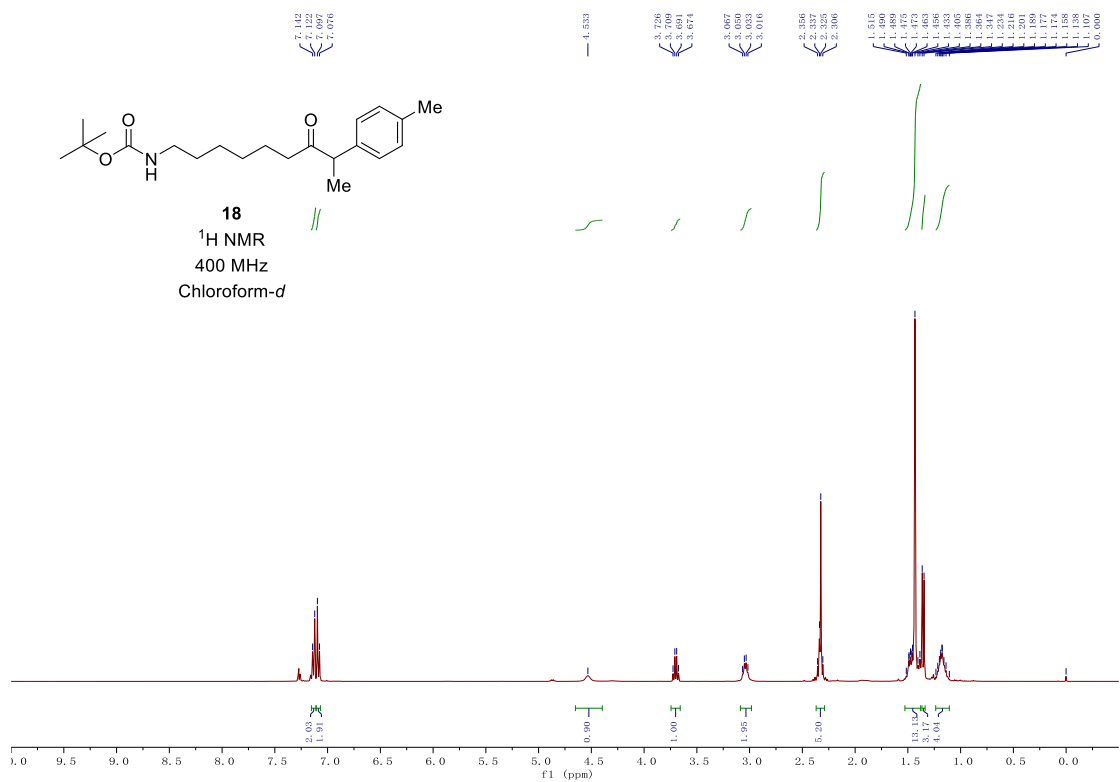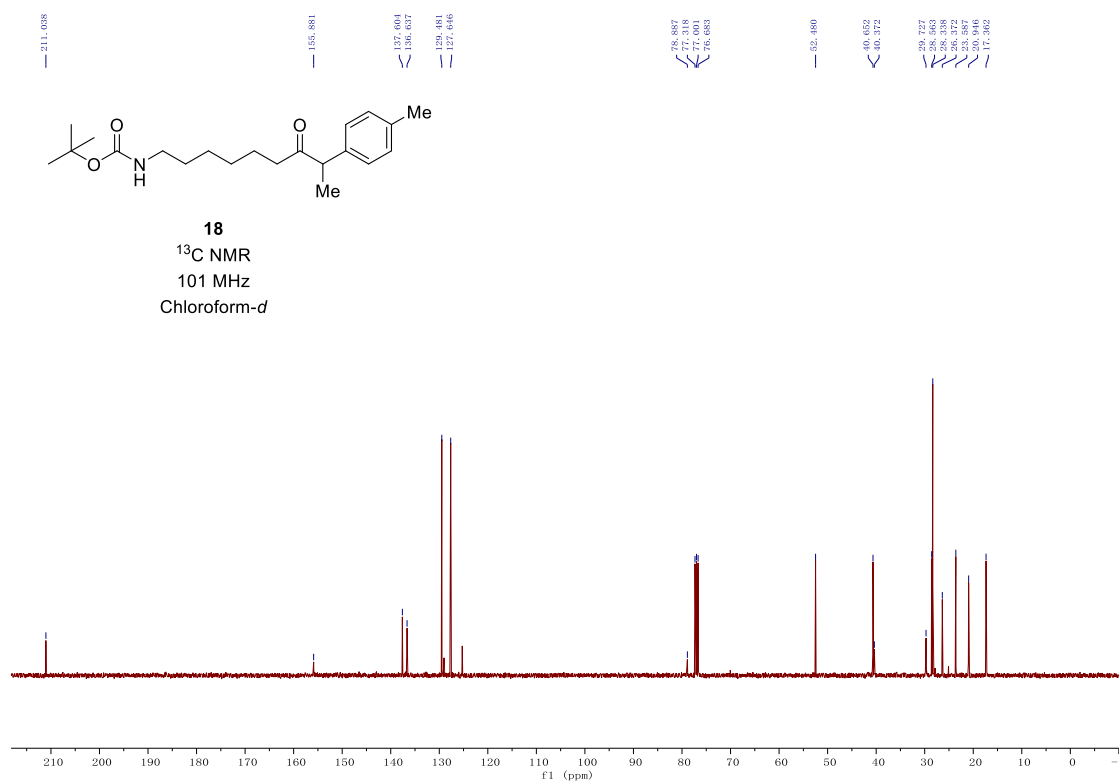

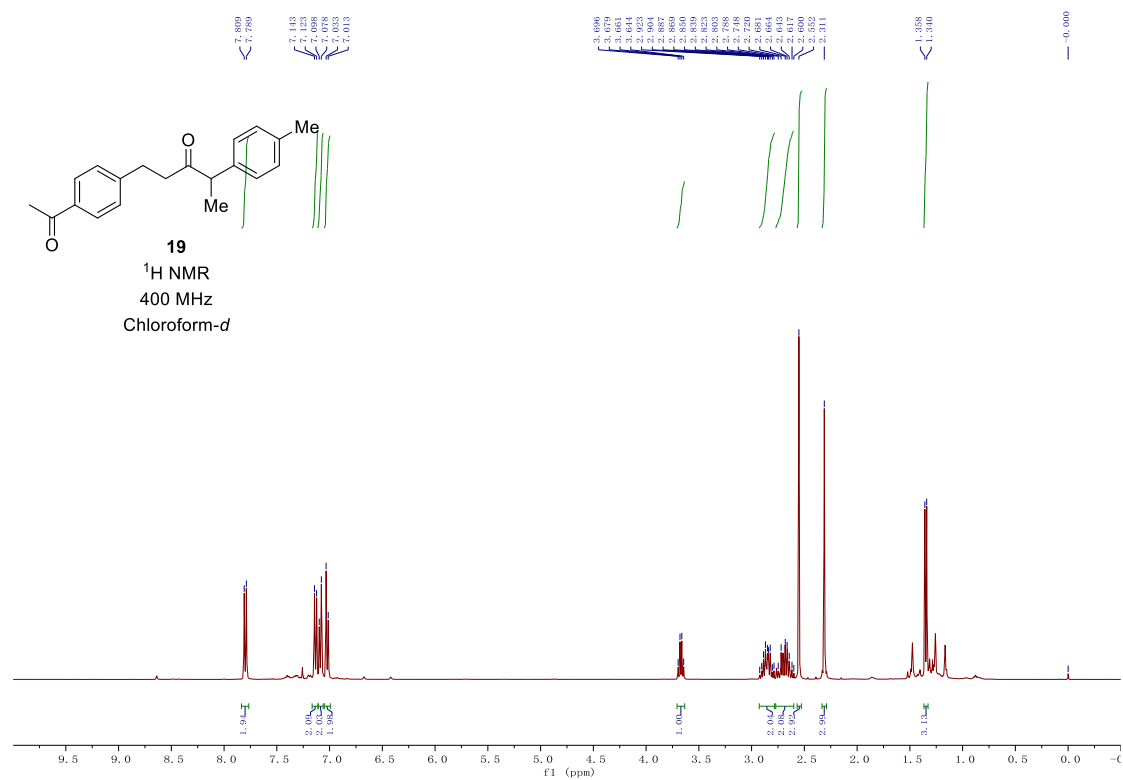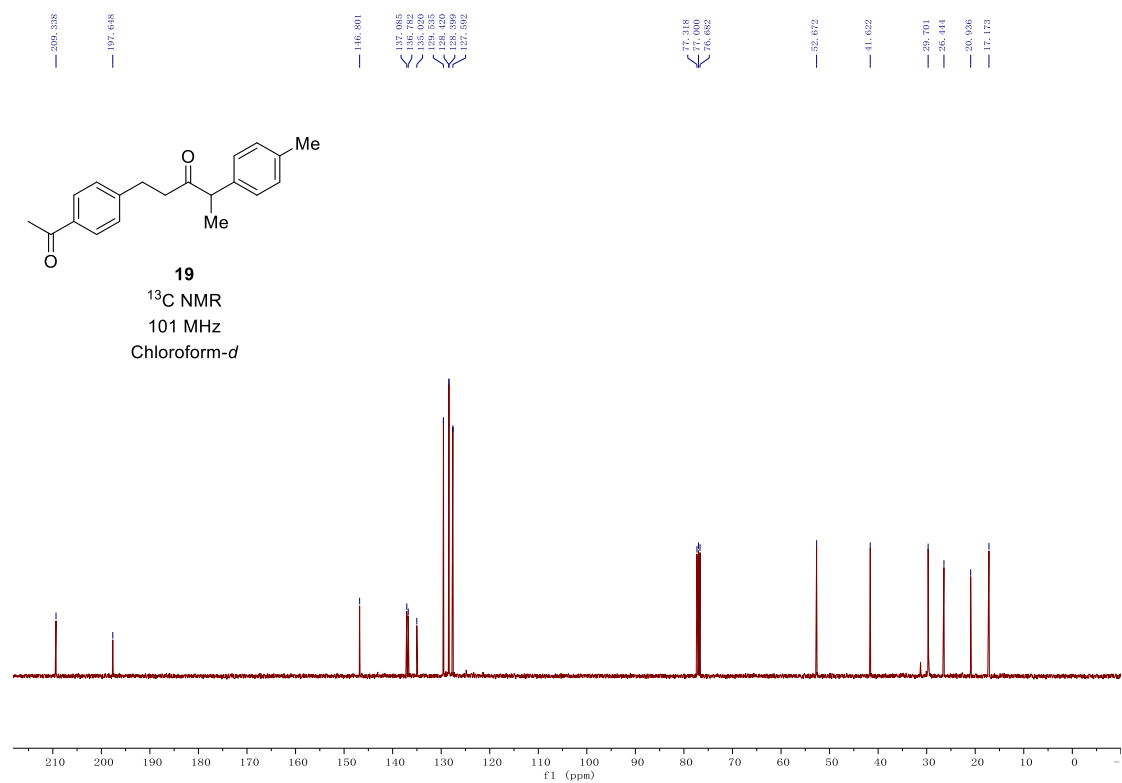

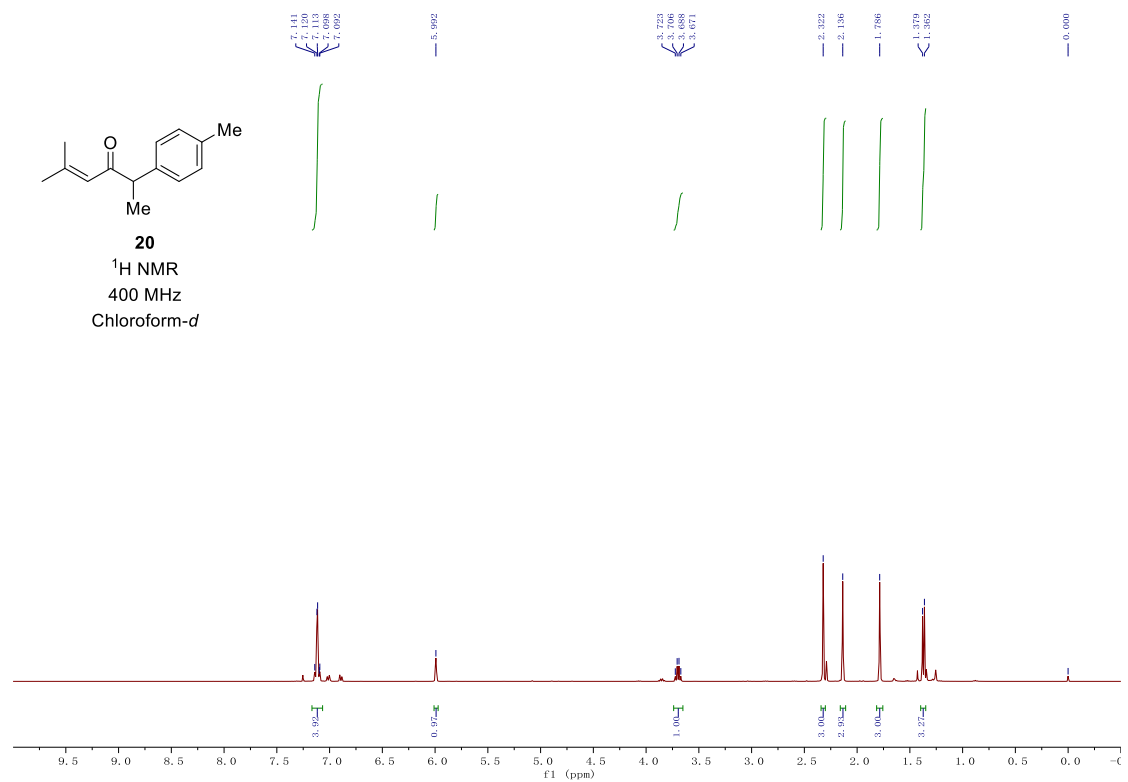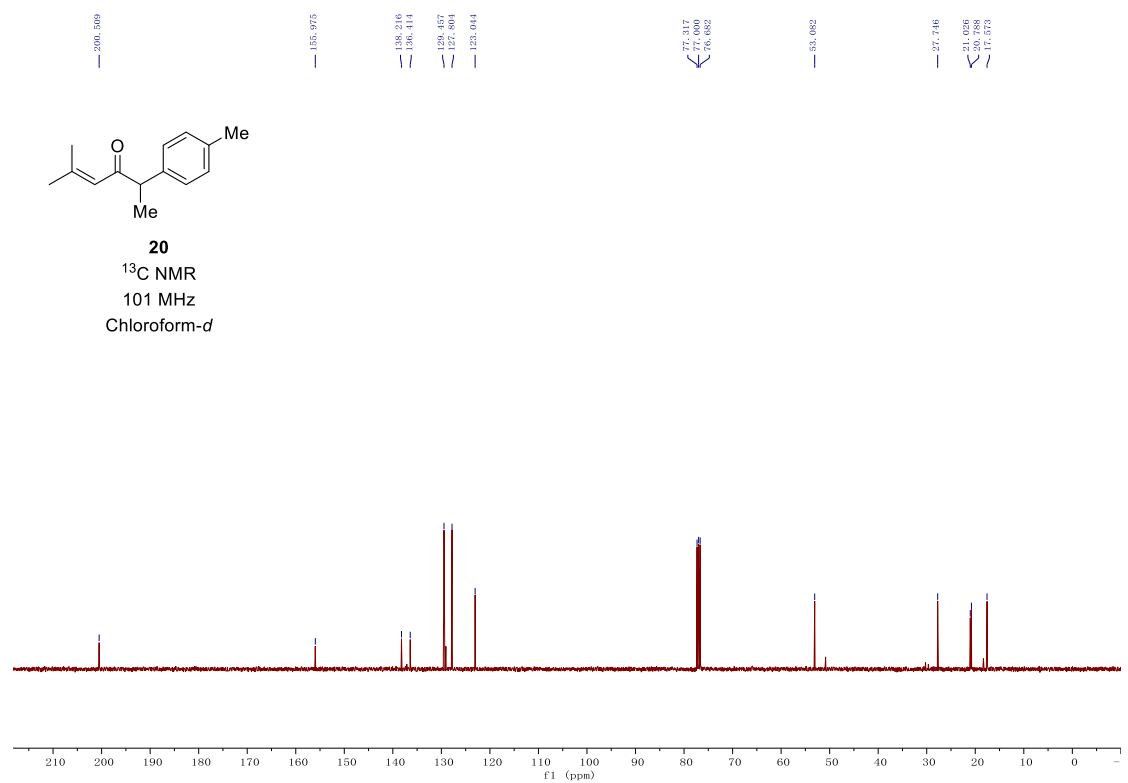

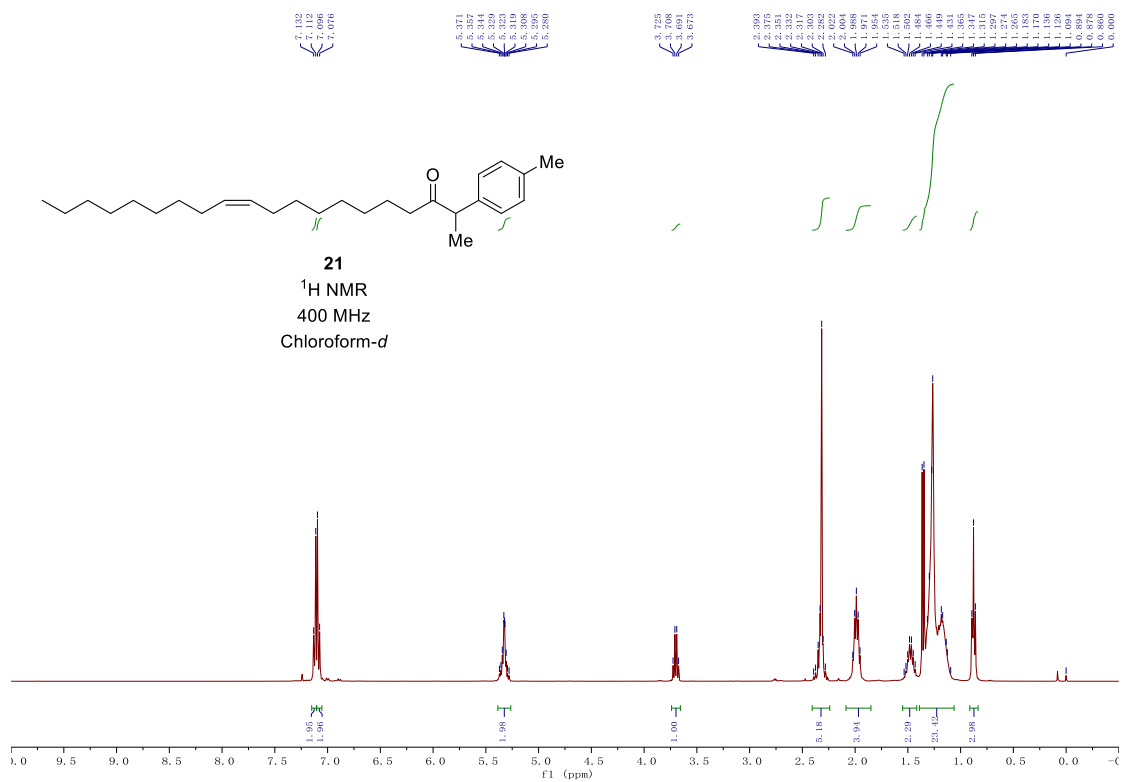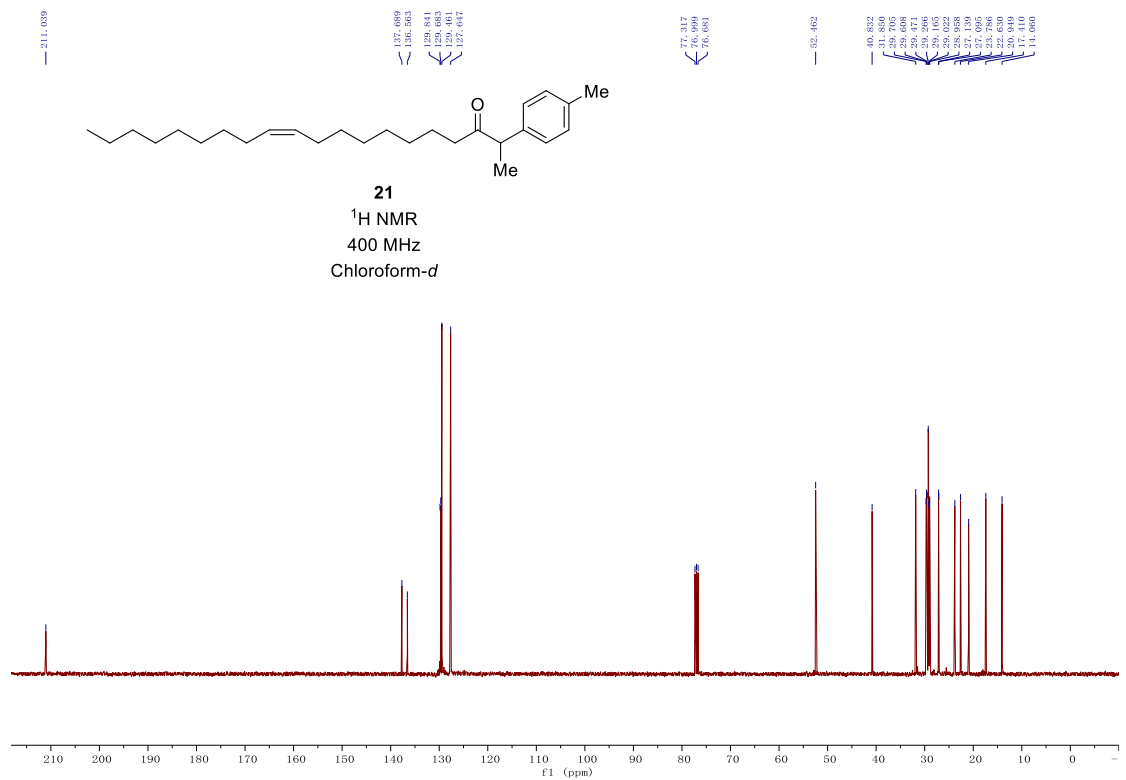



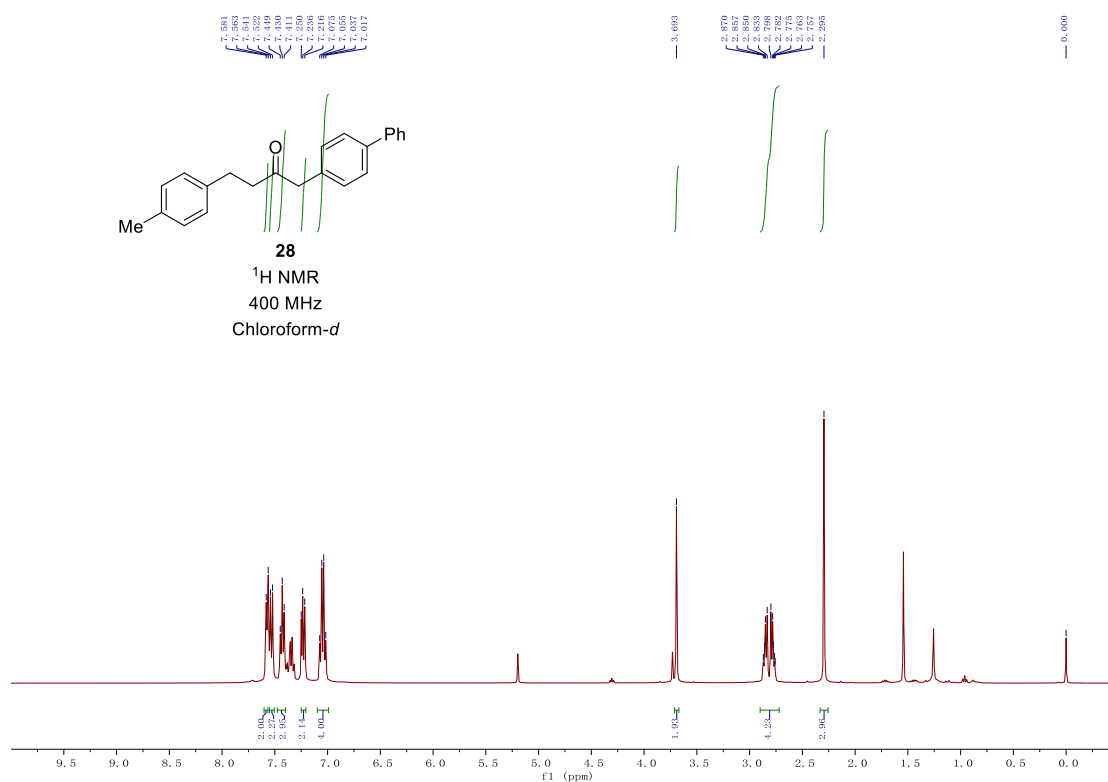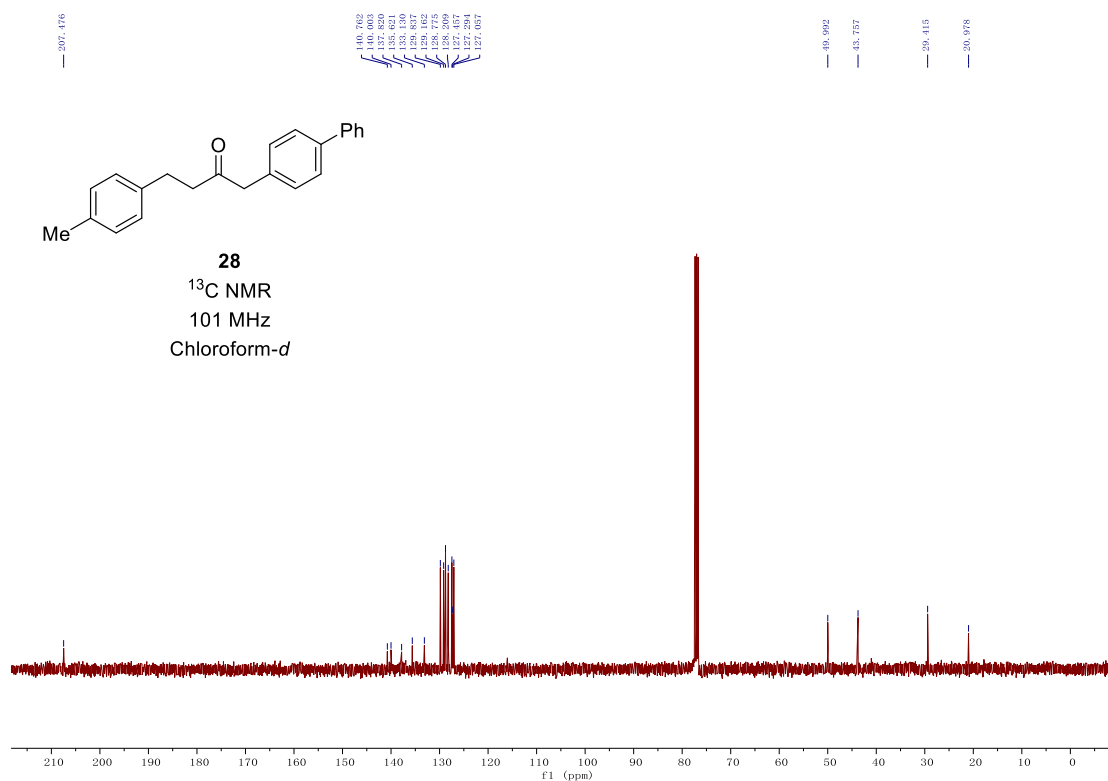

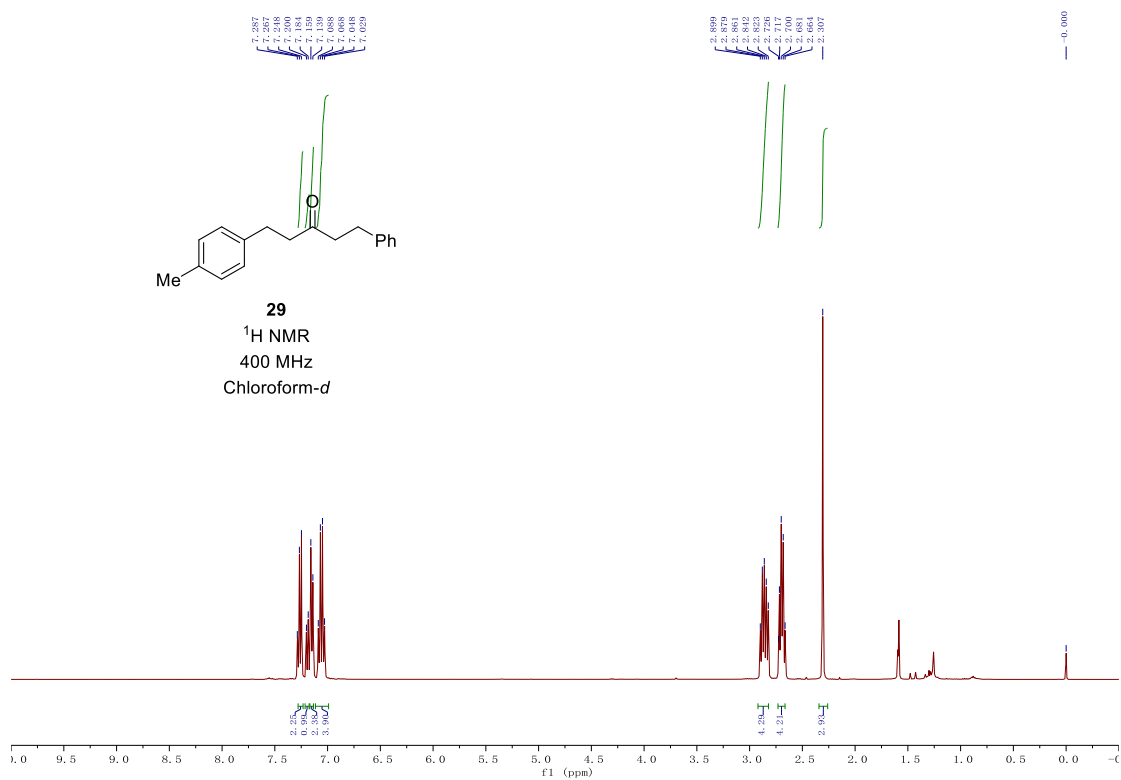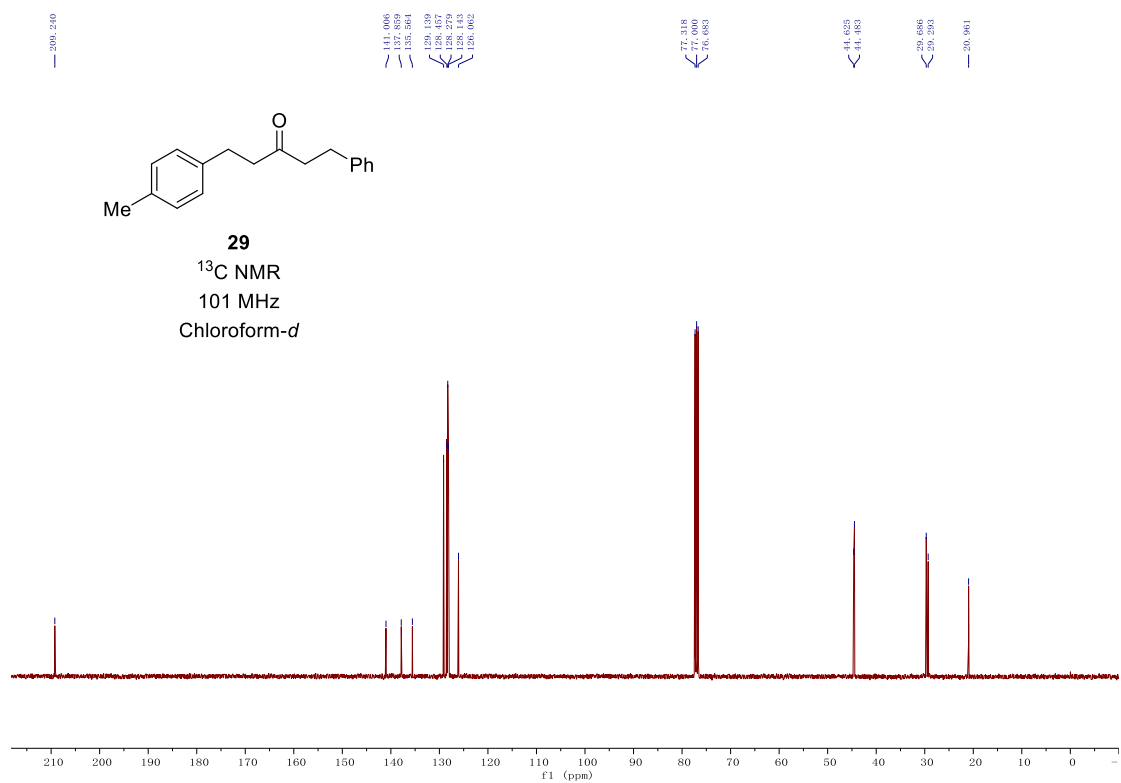

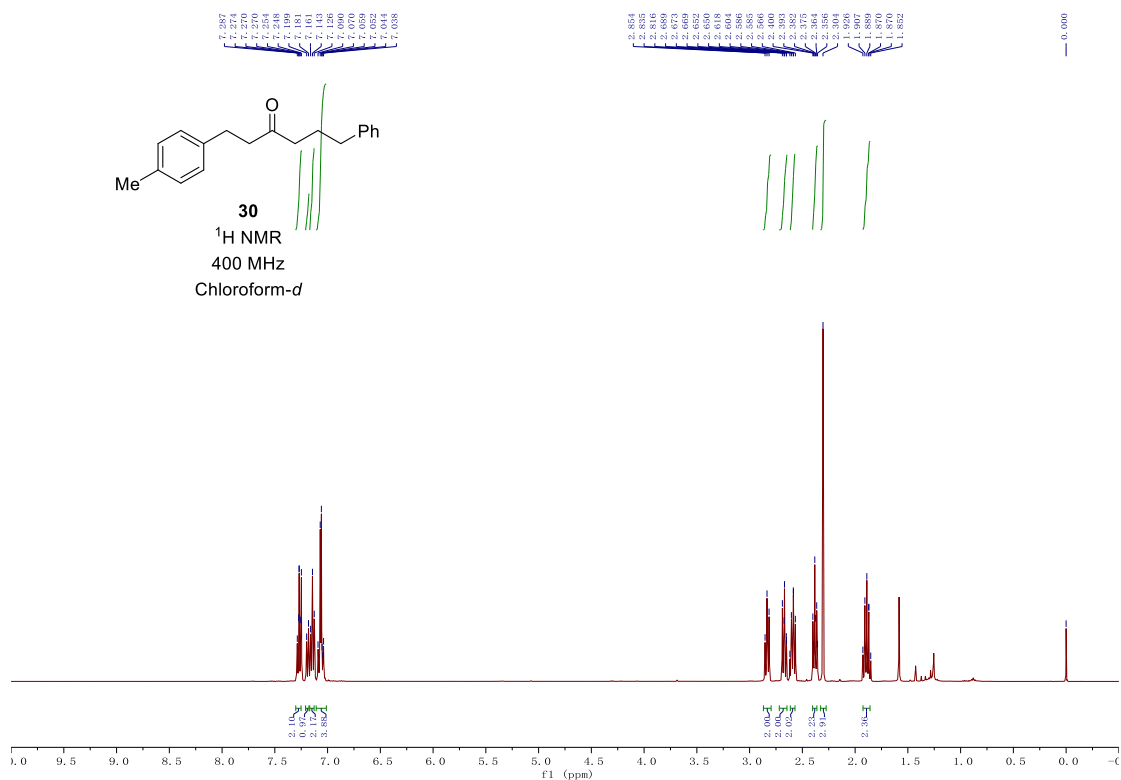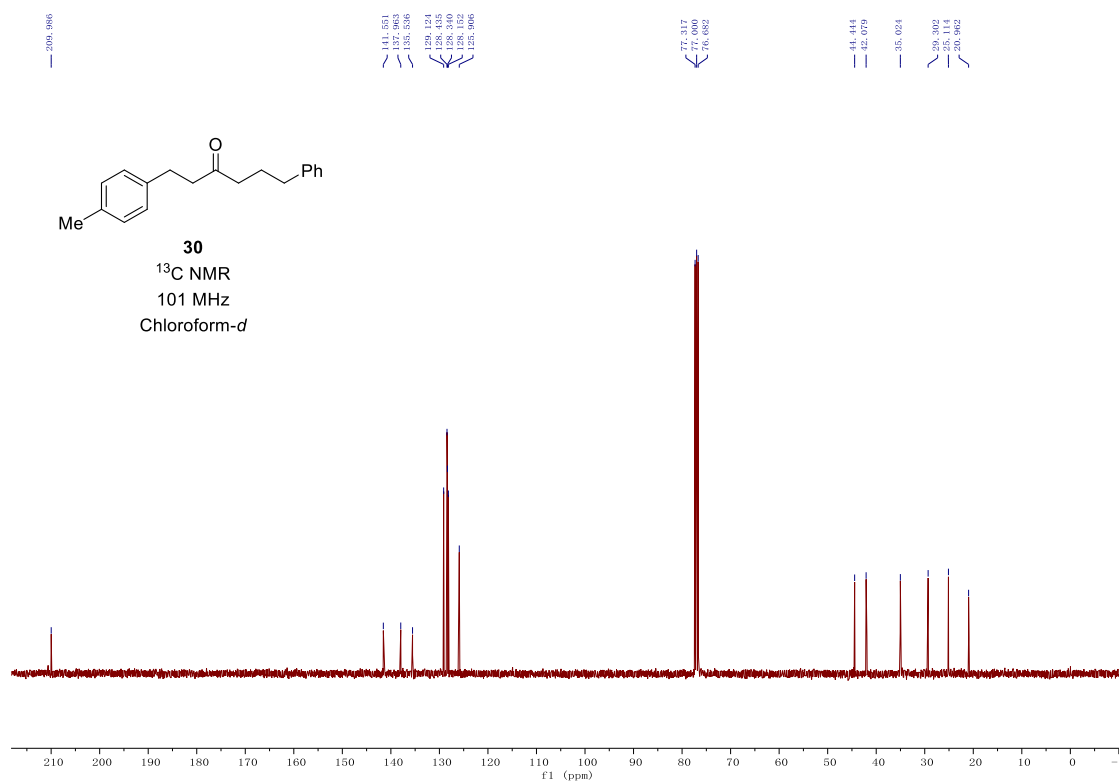

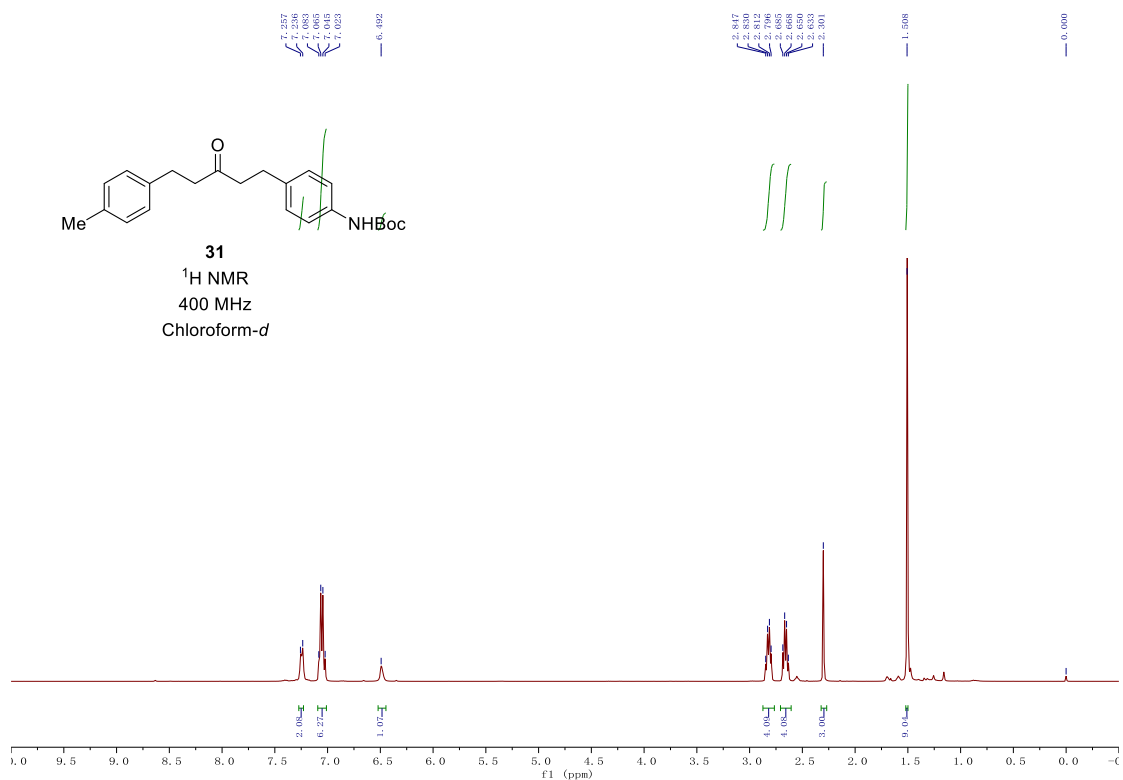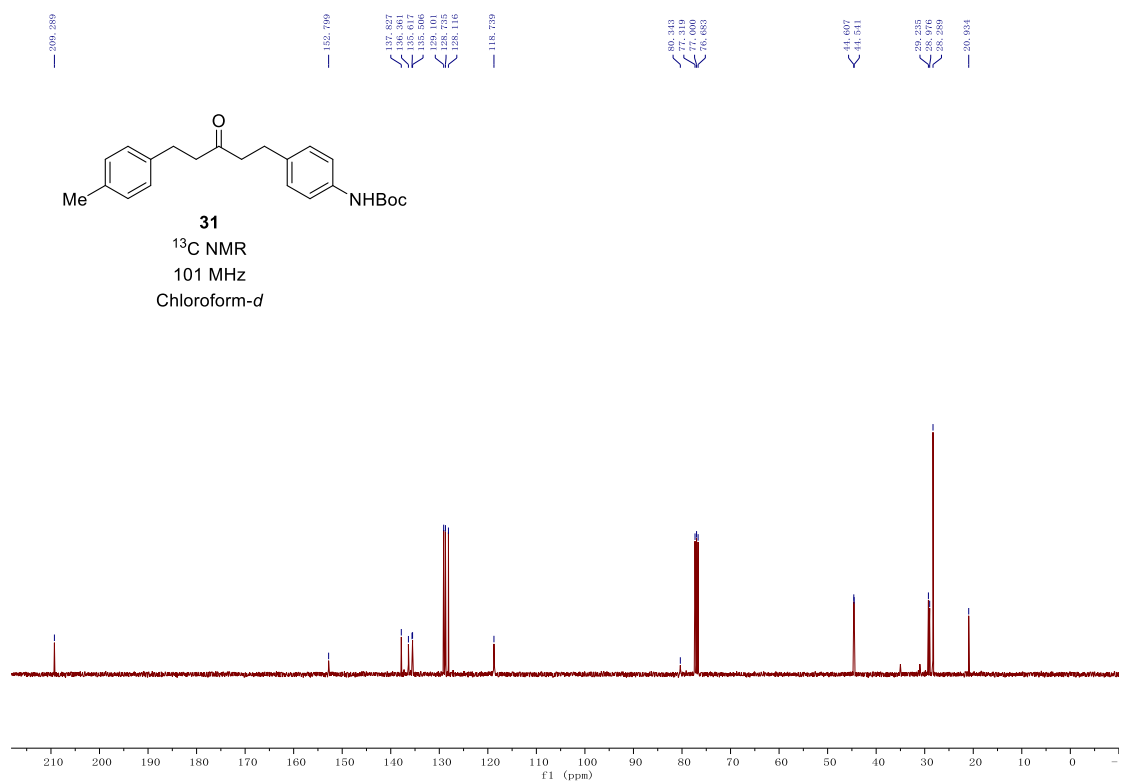

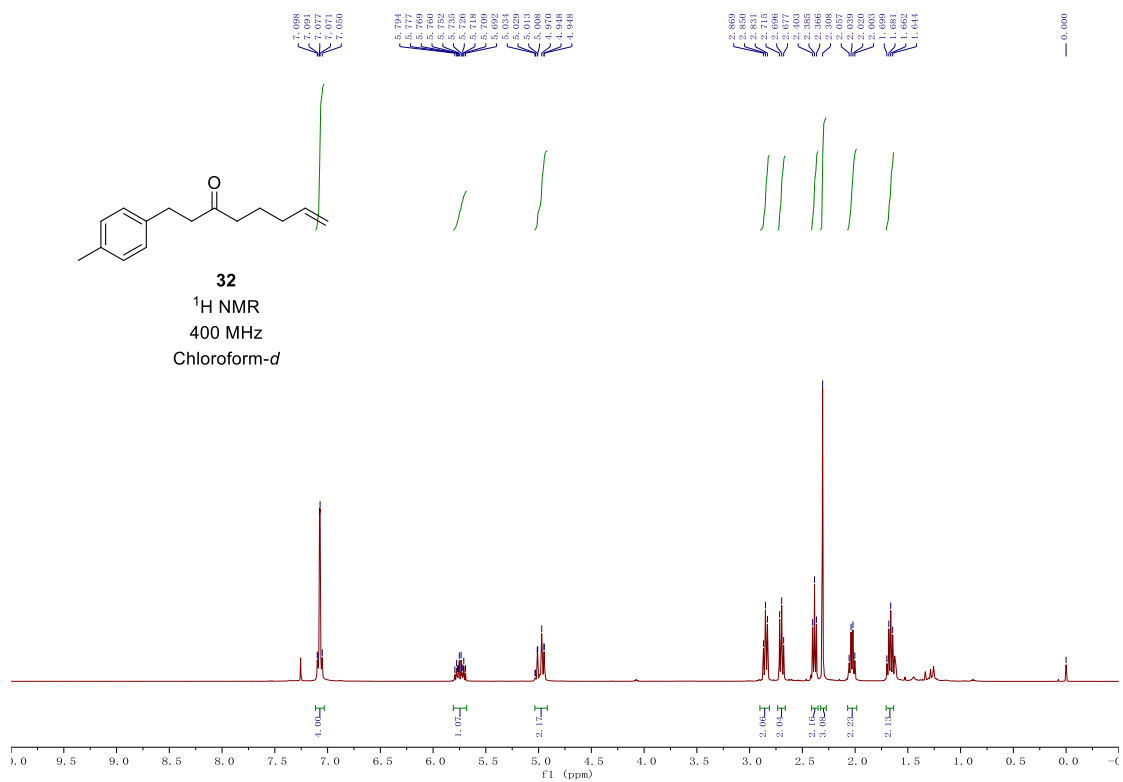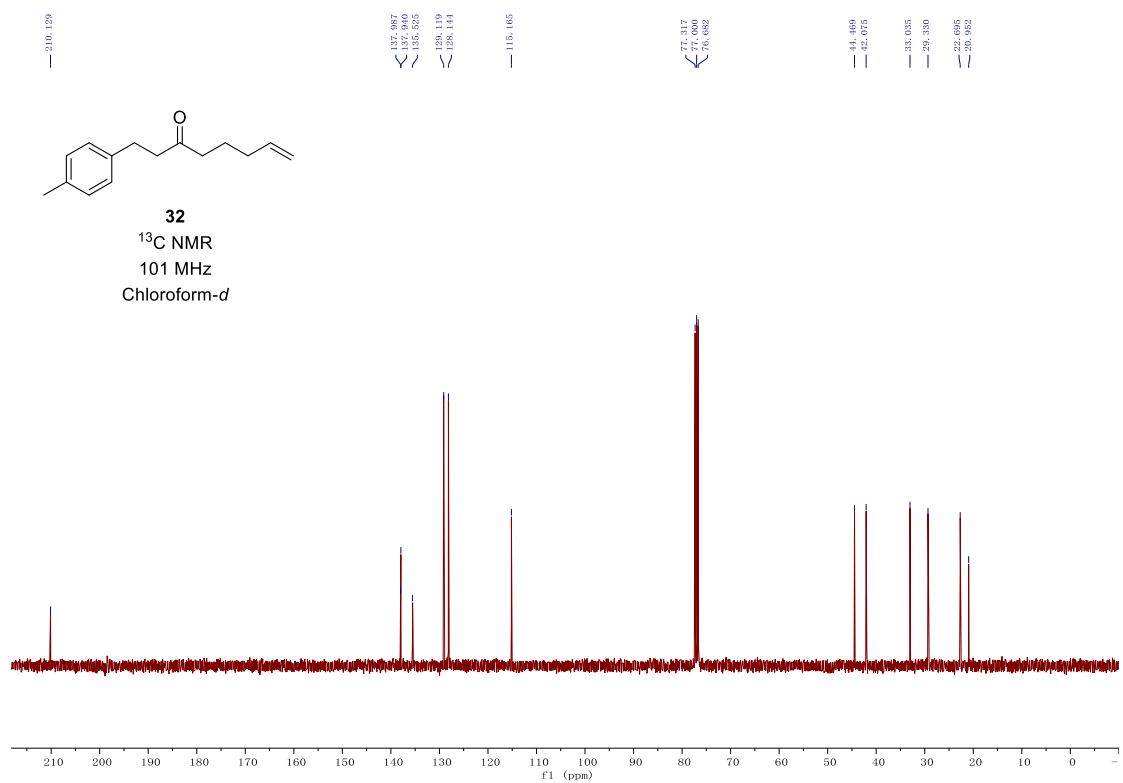

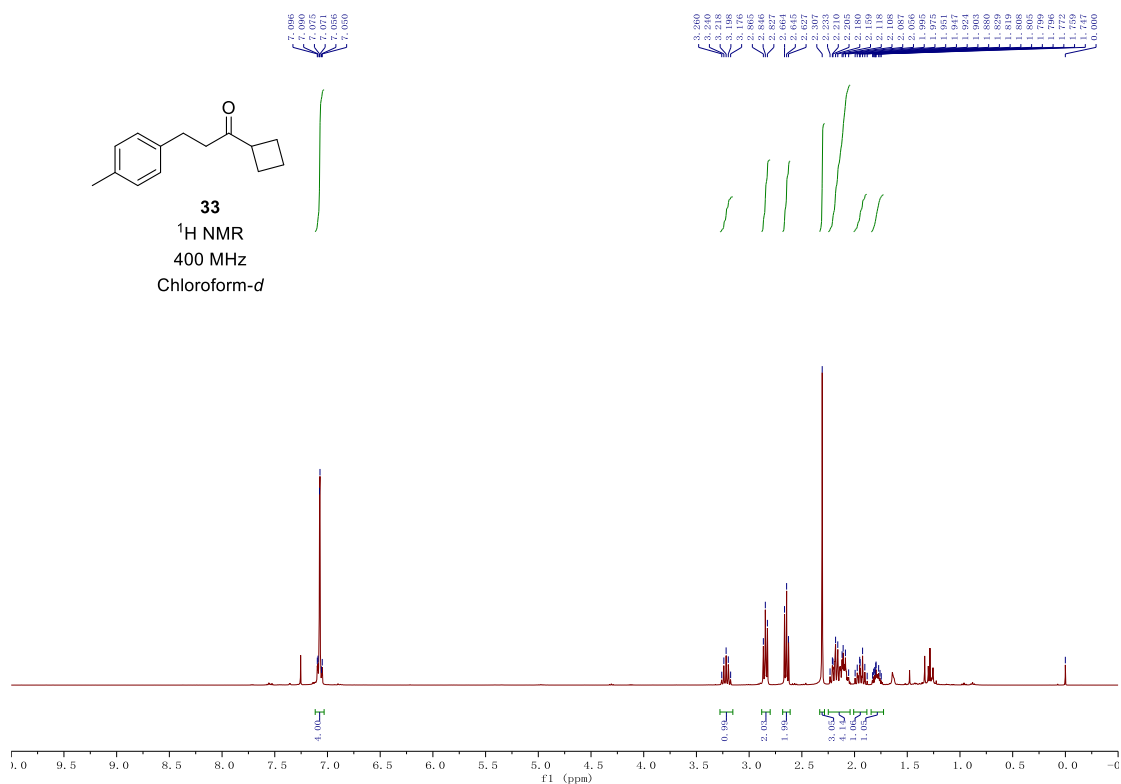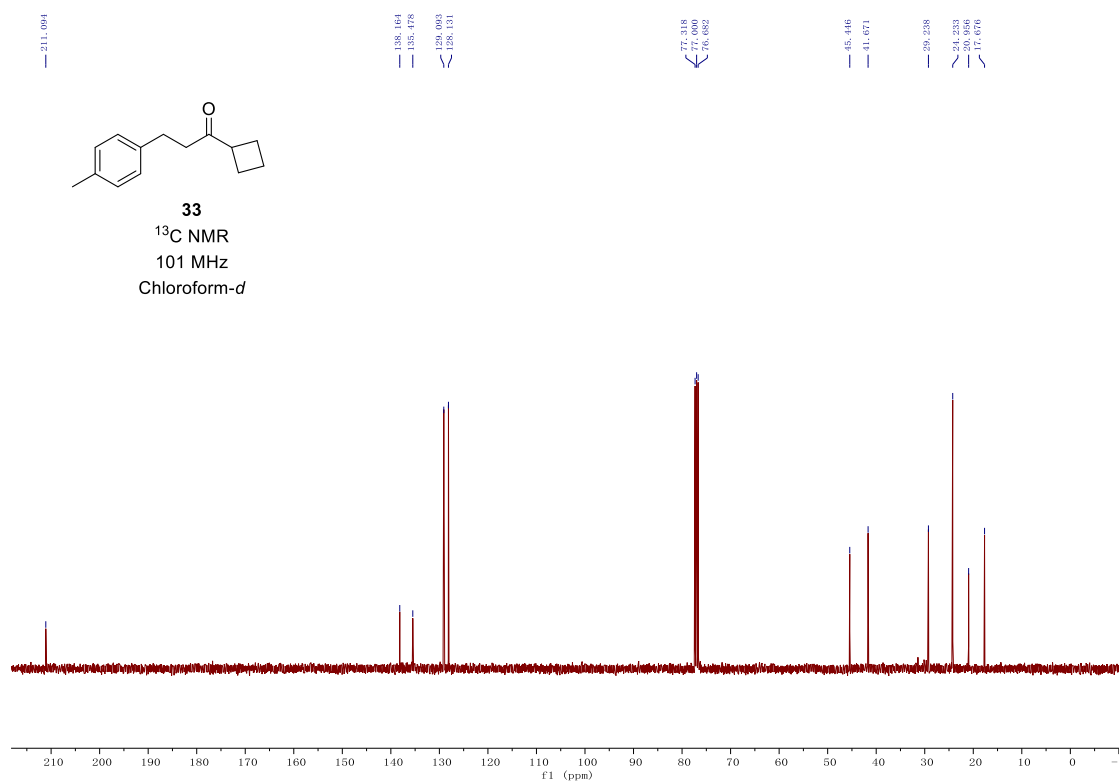

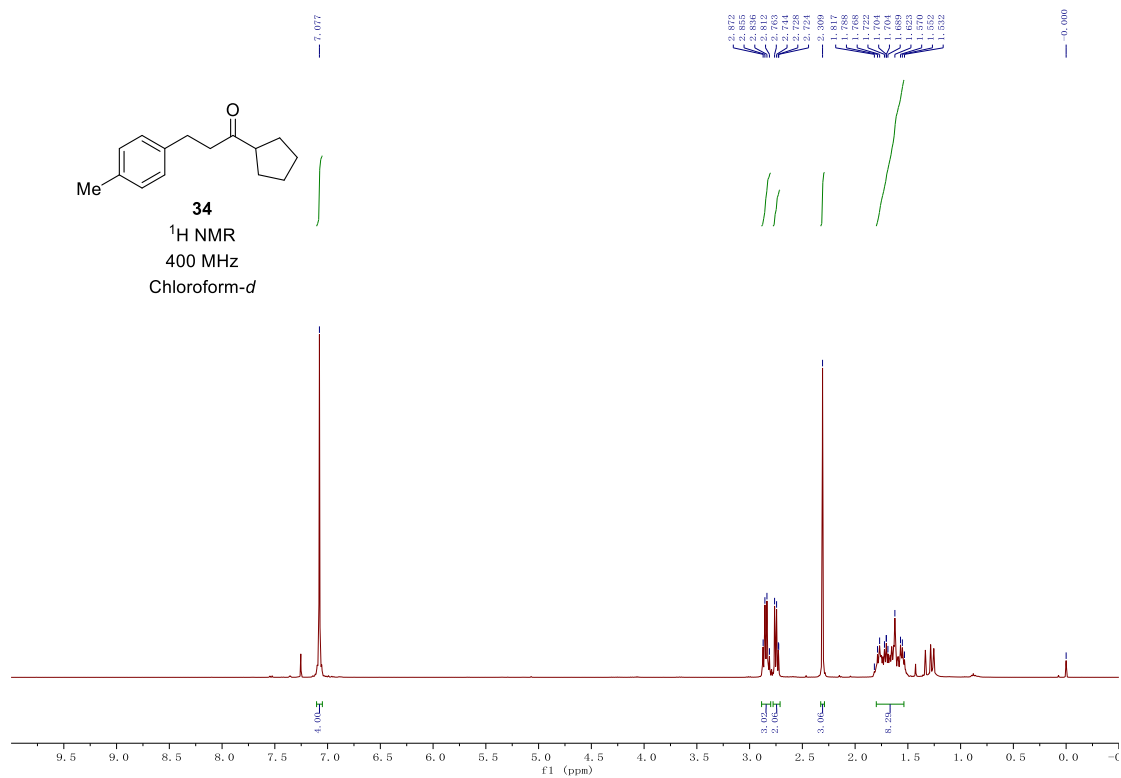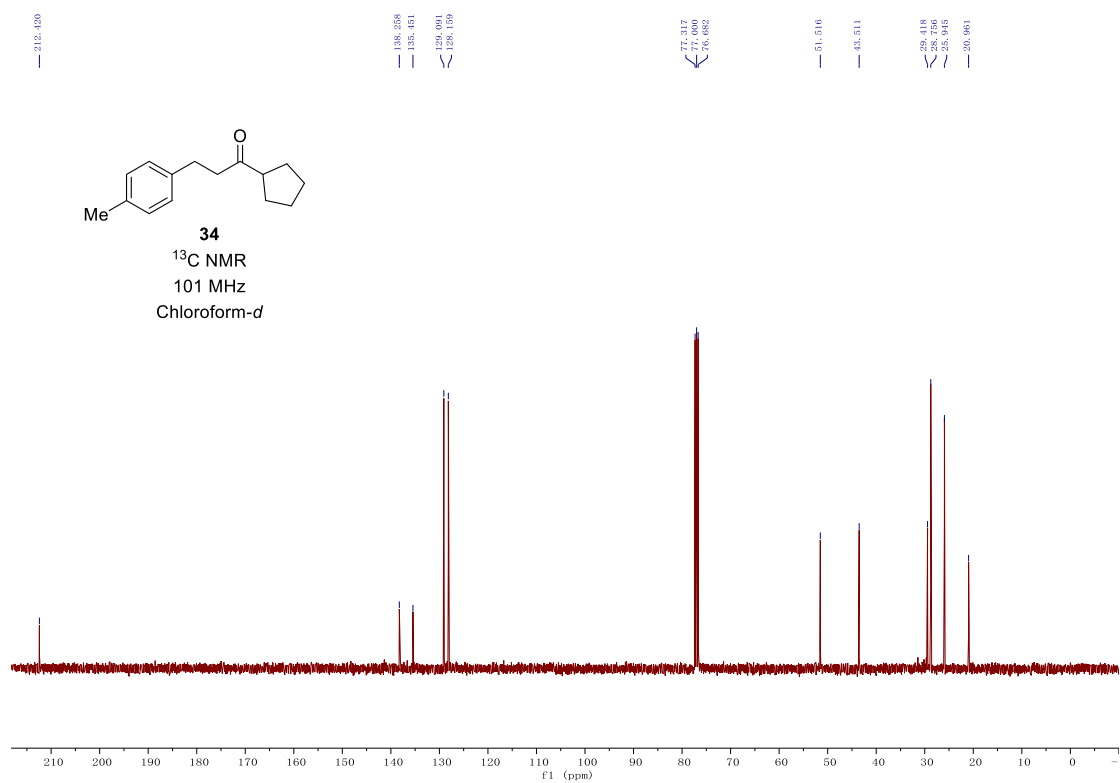



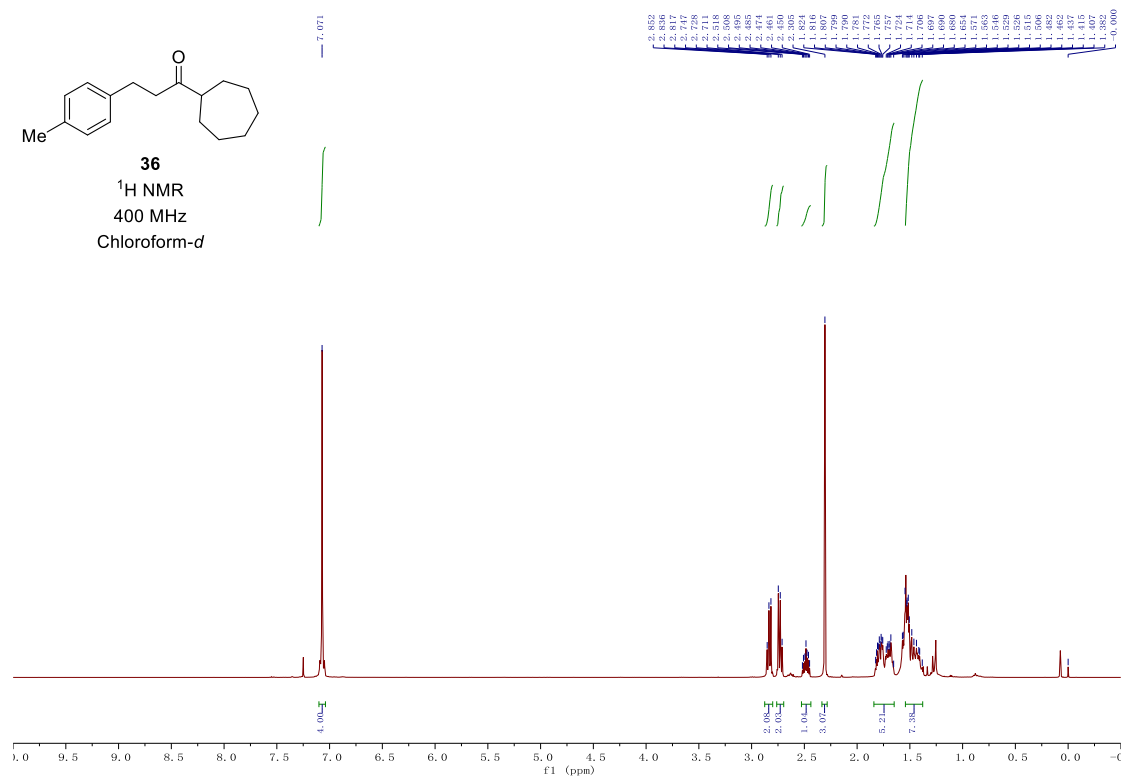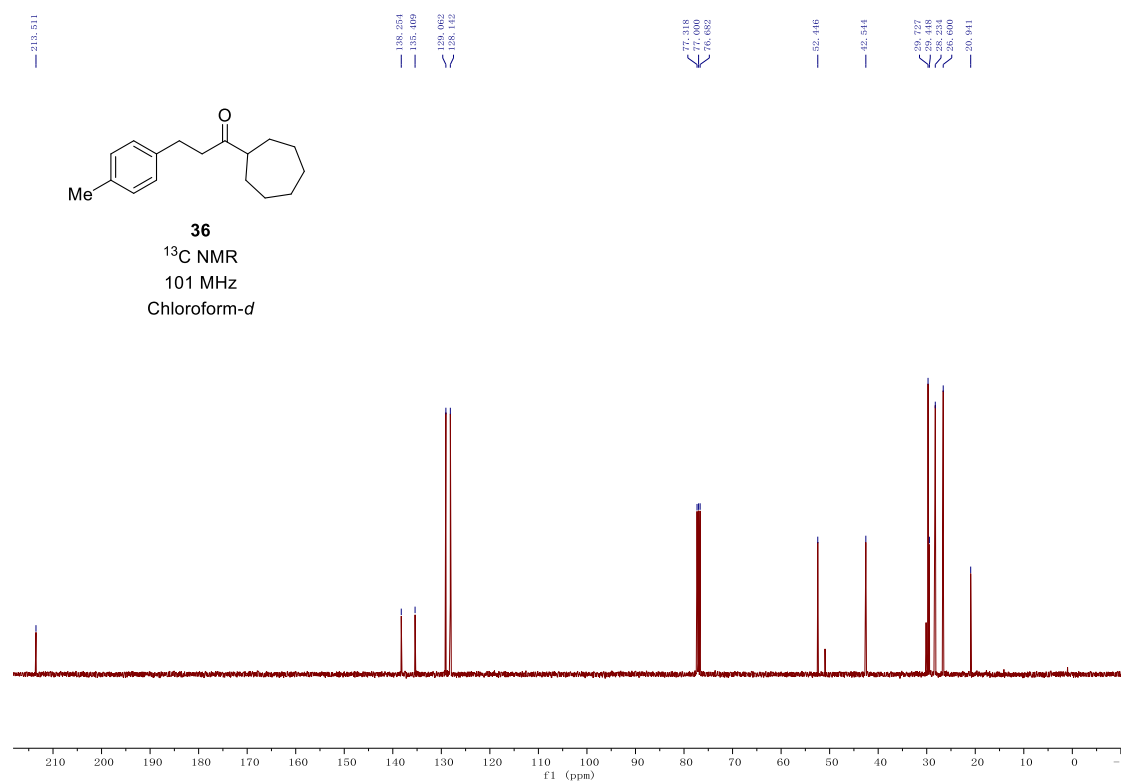

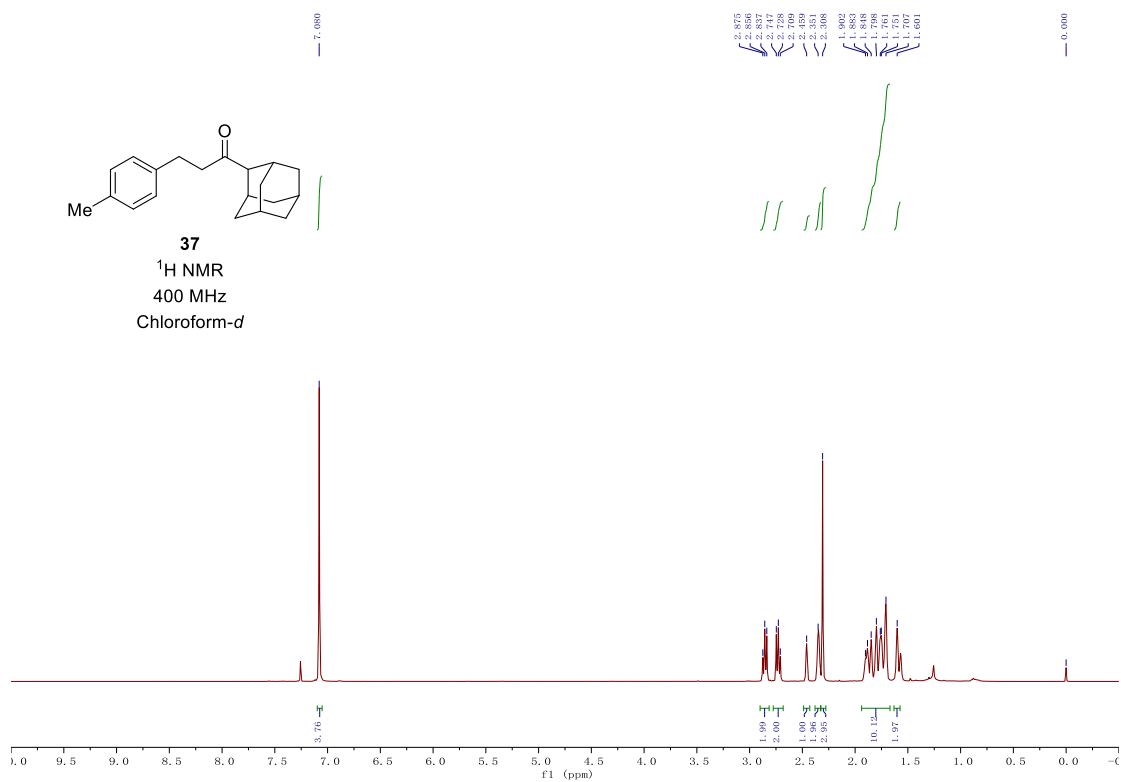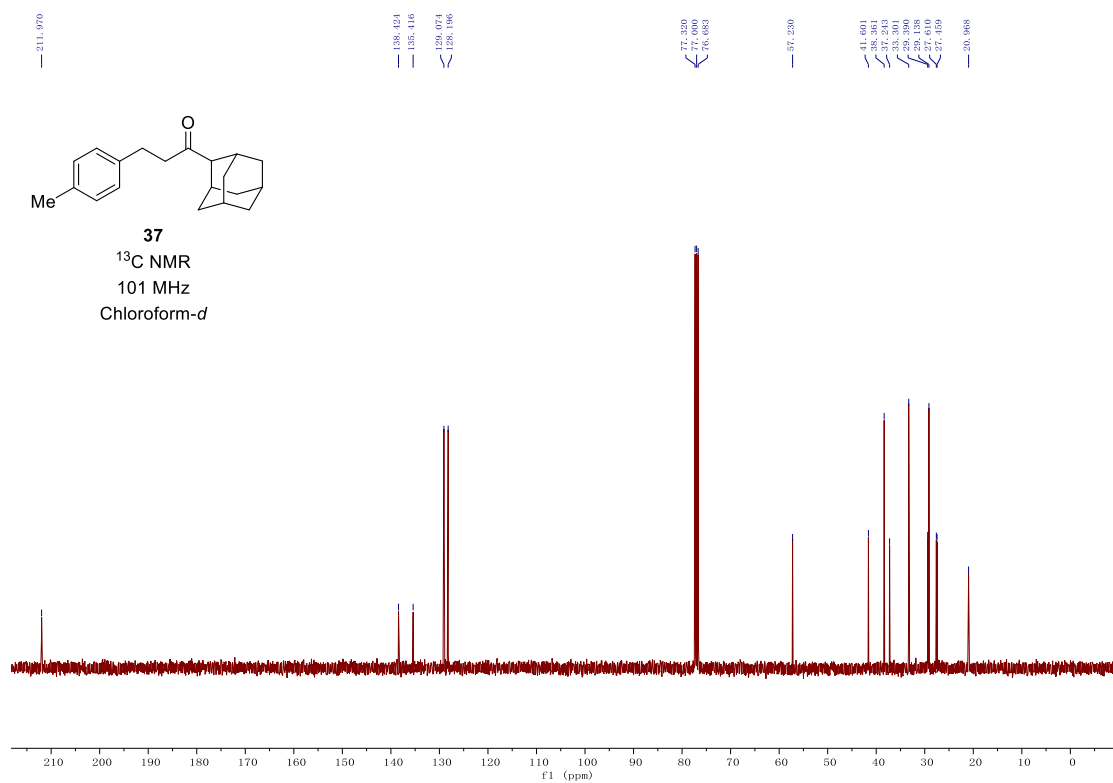

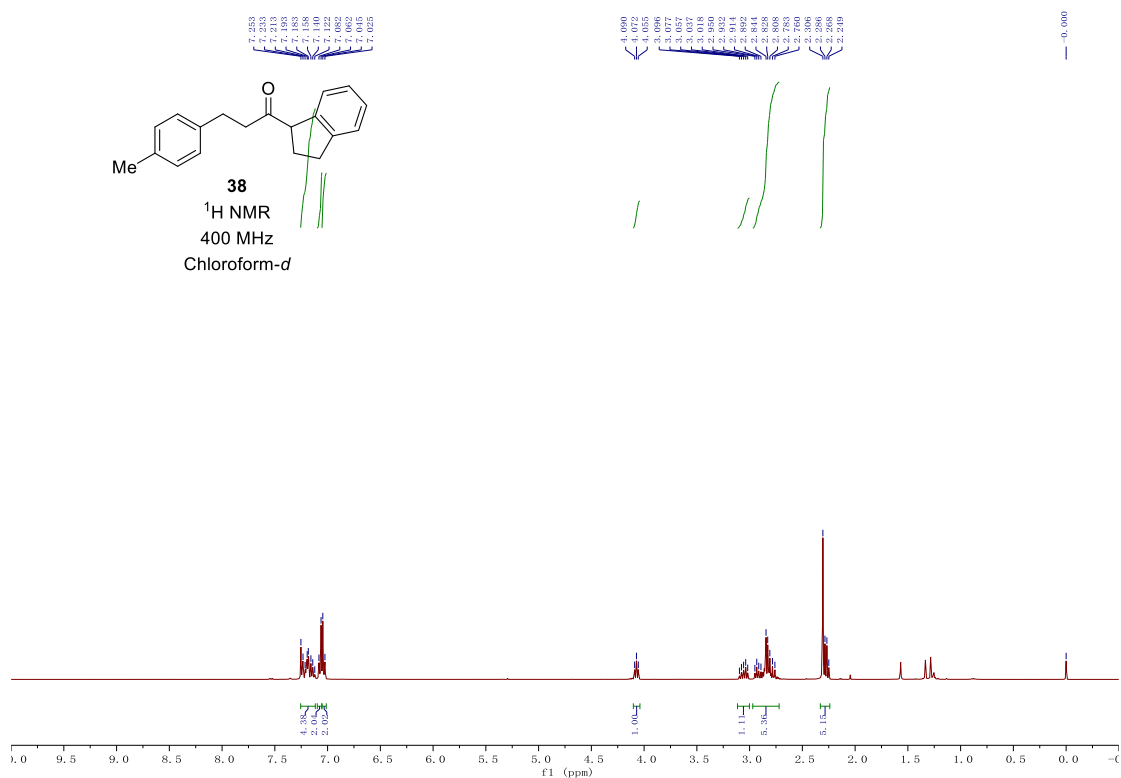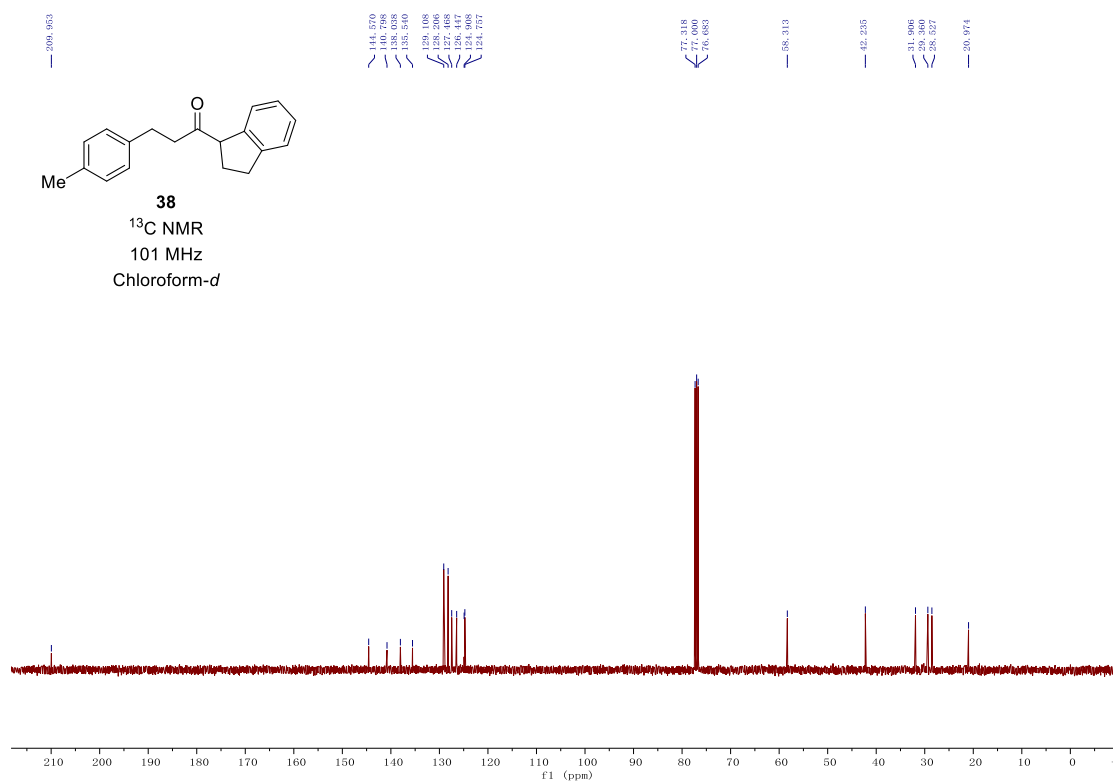

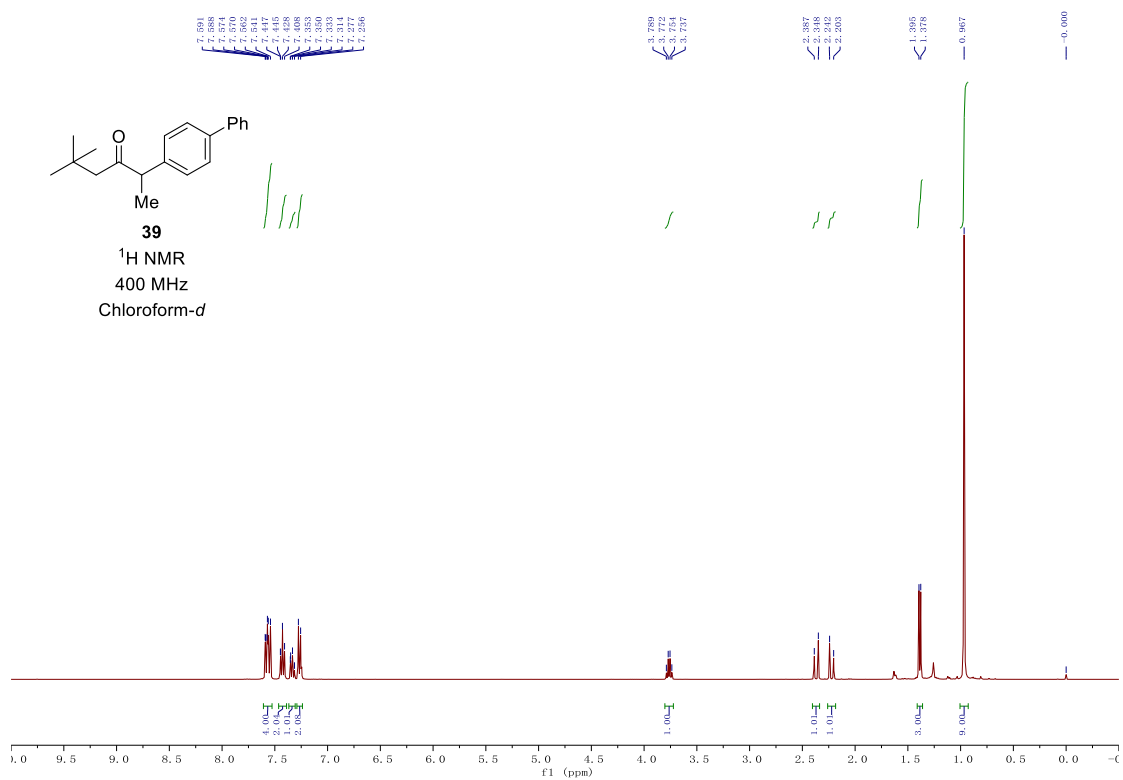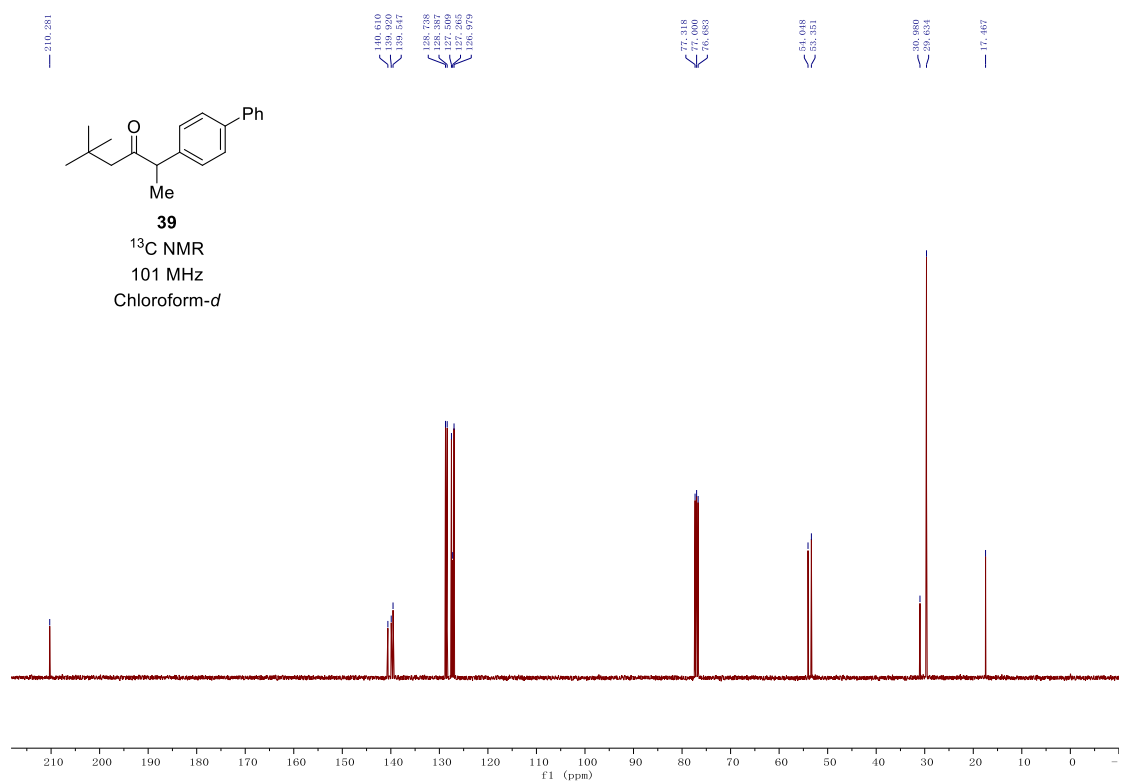

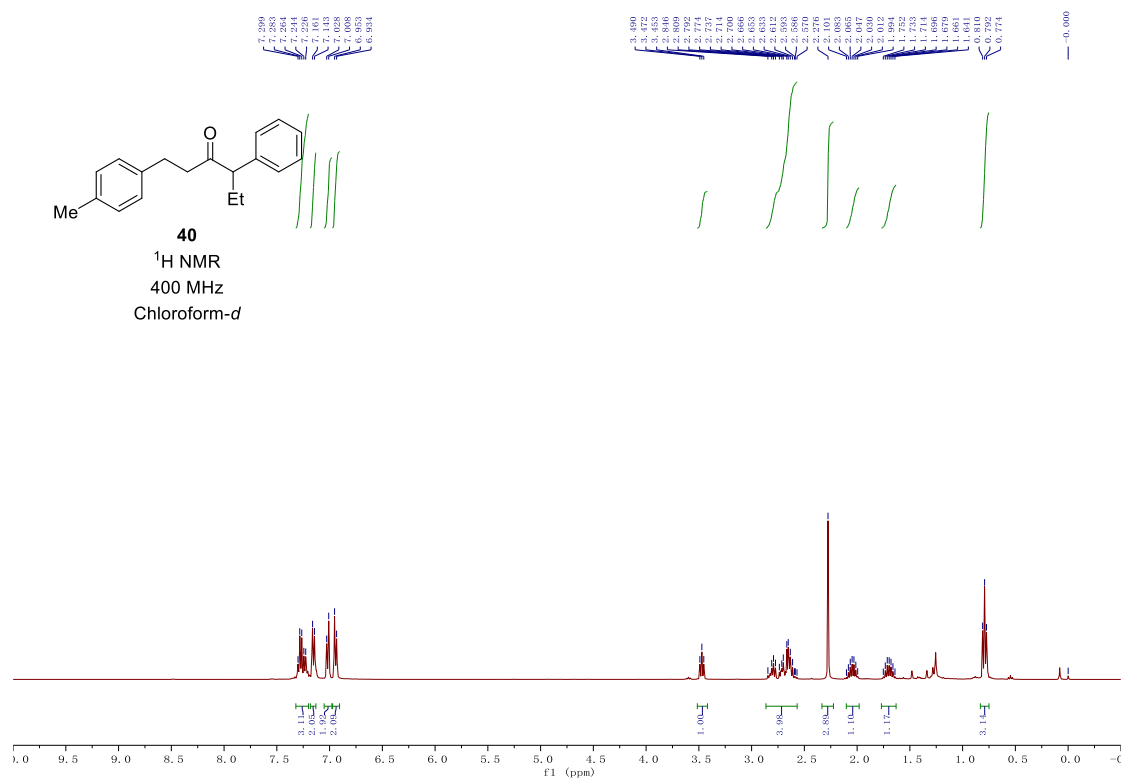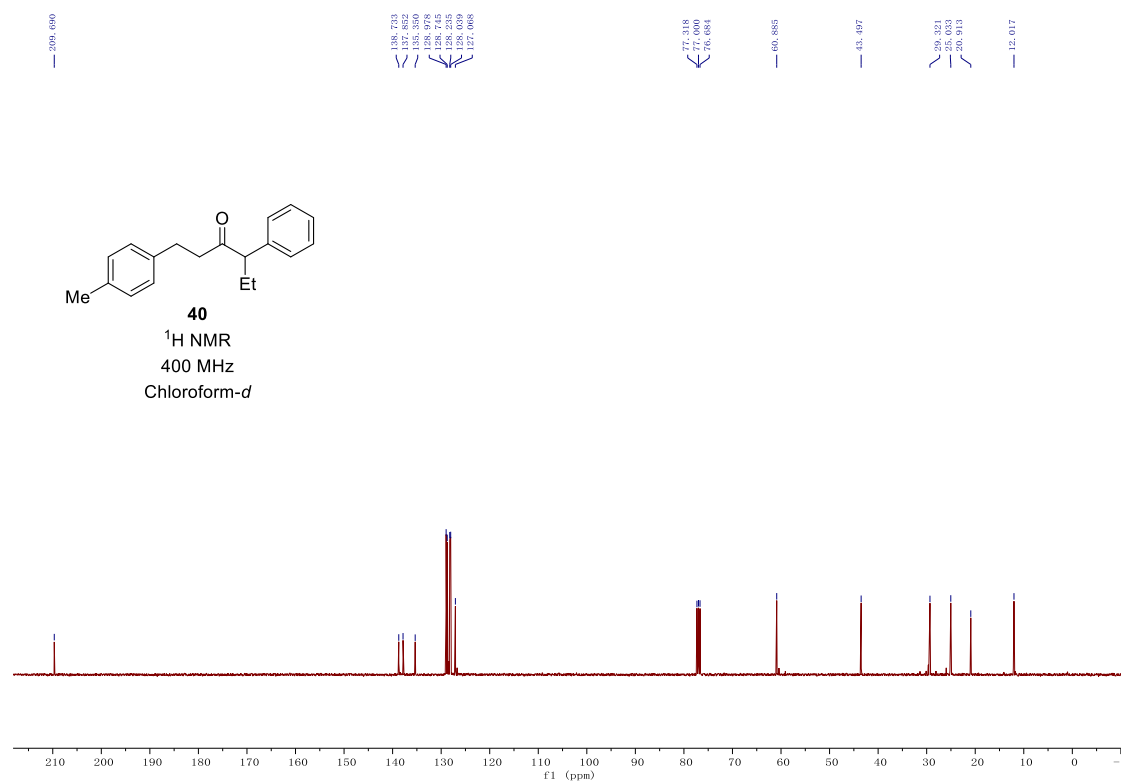

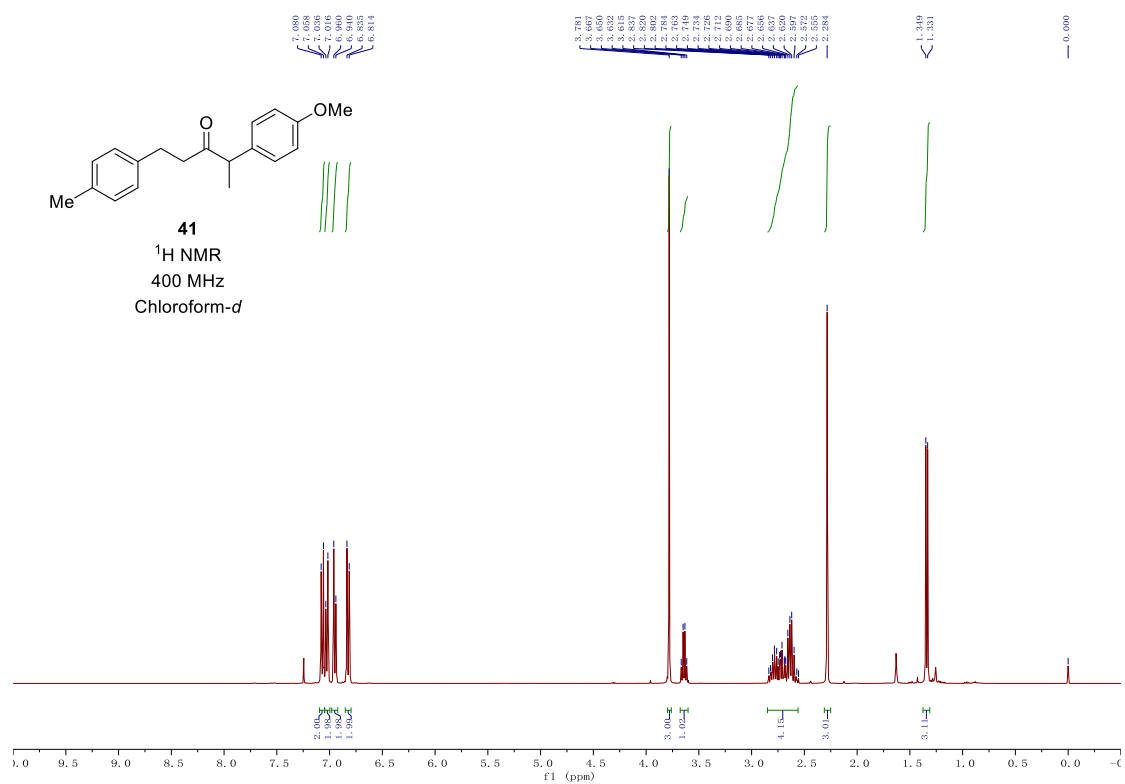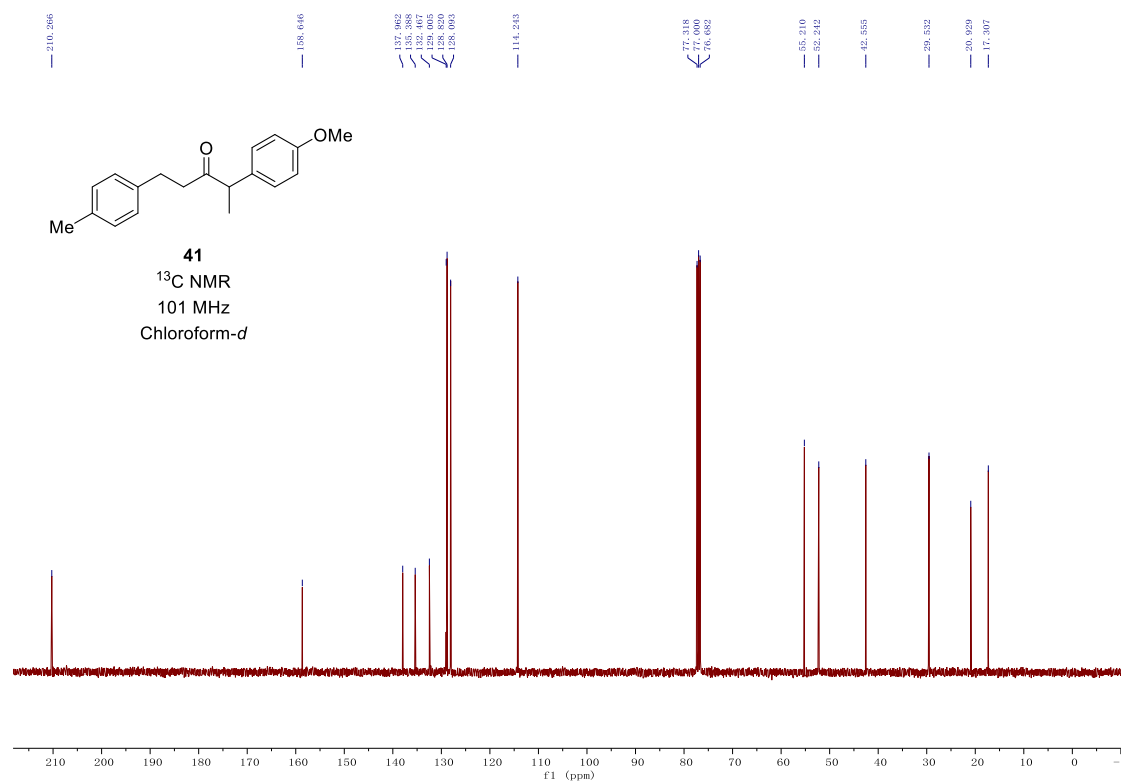

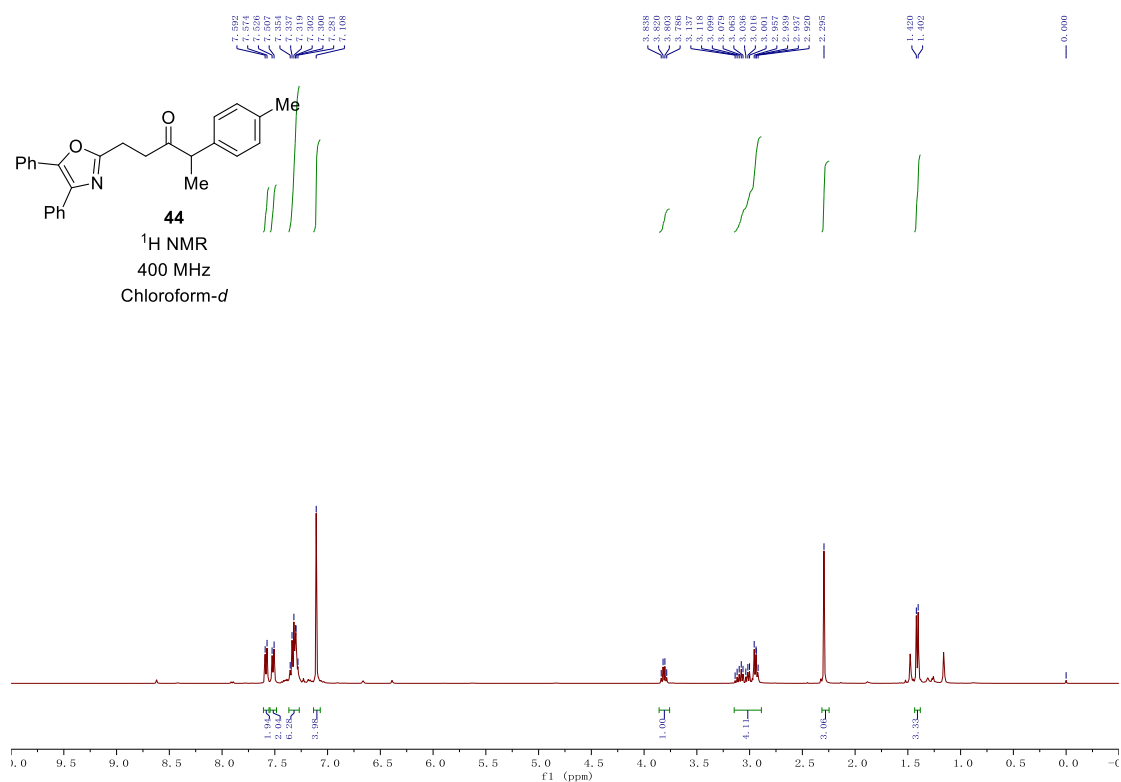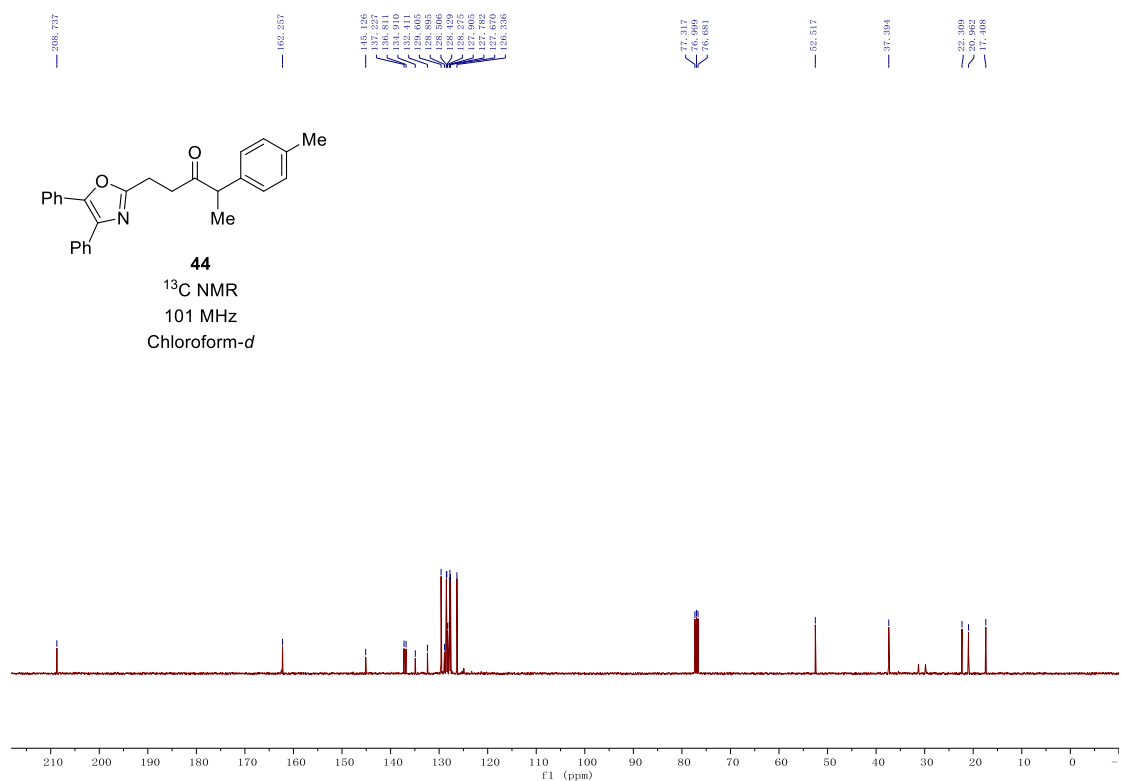

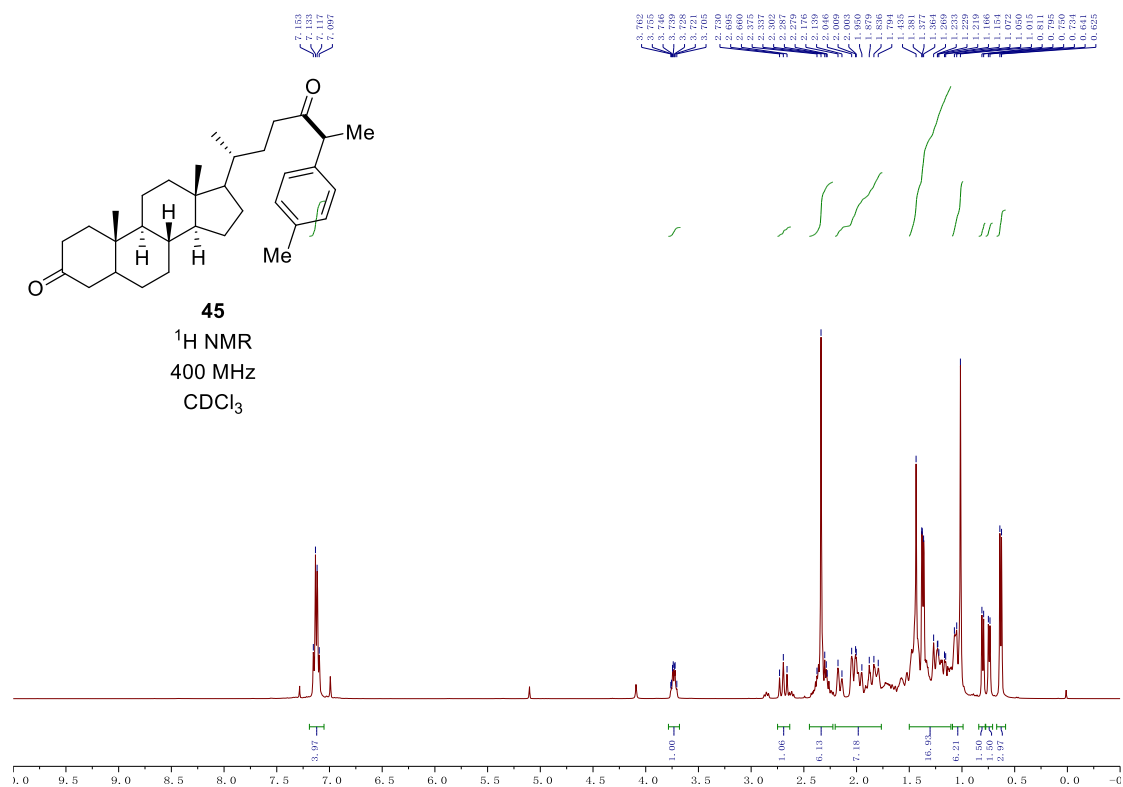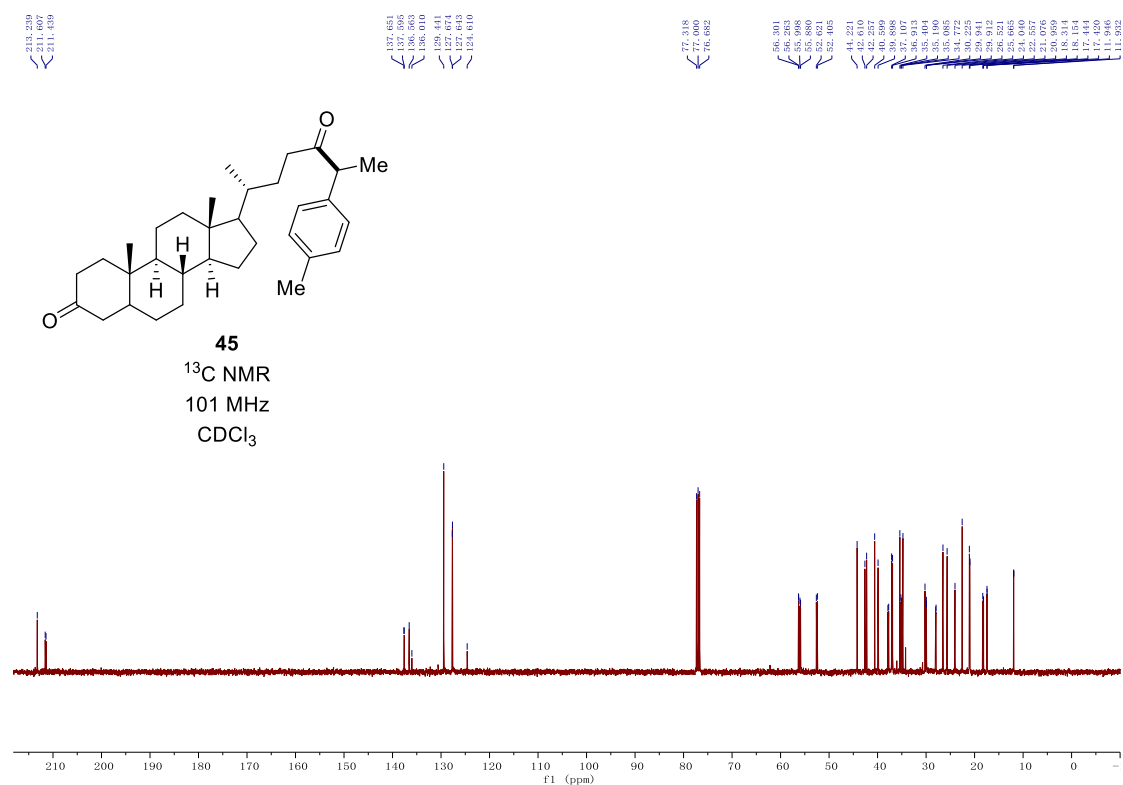

Supplement: d4sc05420b1.pdf [file d4sc05420b1.pdf]
